# Supplementary material
Source: PubMed Central journal article supplement (PMC4885755)
Supplement: NIHMS787181-supplement.pdf [file NIHMS787181-supplement.pdf]

## Lens ER-stress response during cataract development in *Mip*-mutant mice

Yuefang Zhou, Thomas M. Bennett, and Alan Shiels

### Supplemental Data

**Supplemental Figure 1.** Boxplot analysis of non-normalized raw microarray data for *Lop/+* and wild-type mouse lenses at P1 and P7.

**Supplemental Figure 2.** Validation of selected gene expression in the *Lop/+* lens (P7). (A) qPCR analysis confirms up-regulation of *Hspa5* and *Ddit3* transcripts. End-point RT-PCR confirms splicing of *Xbp1* transcripts (B) and up-regulation of *Ddit3*, *Chac1*, *Retnla*, and *Cox6a2* transcripts (C). D. Immunoblot analysis confirms up-regulation of p62.

**Supplemental Figure 3.** Immunofluorescence imaging of *Ddit3* expression in the *Lop/+* mouse lens. Sagittal cryo-sections of wild-type (A and B) and *Lop/+* (C and D) lenses (P7) stained (red) with anti-GADD153/DDIT3/CHOP (A and C) merged with DAPI staining (blue) of cell nuclei (B and D). Note immunostaining is restricted to nuclei of degenerating fiber cells toward the center of the *Lop/+* lens (C and D).

**Supplemental Table 1.** PCR primers used for end-point RT-PCR amplification

**Supplemental Table 2.** E14 *Lop/+* lens differentially regulated genes (>1.3-fold) detected by microarray analysis (Mouse-6 BeadChip).

**Supplemental Table 3.** P7 *Lop/+* lens differentially regulated genes (>2-fold,  $p < 0.05$ ) detected by microarray analysis (Mouse-Ref8 BeadChip).

**Supplemental Table 4.** P1 *Lop/+* lens differentially regulated genes (>2-fold,  $p < 0.05$ ) detected by microarray analysis (Mouse-Ref8 BeadChip).

**Supplemental Table 5.** P1 *Lop/+* lens pathway analysis using the KEGG database

**Supplemental Table 6.** P7 *Lop/+* lens pathway analysis using the KEGG database

**Supplemental Table 7.** P7 *Lop/+* lens pathway analysis using the GO database

**Supplemental Table 8.** P7 *Lop/+* lens differentially regulated genes detected by UPR qPCR-array

**Supplemental Table 9.** P1 *Lop/+* lens differentially regulated genes detected by UPR qPCR-array

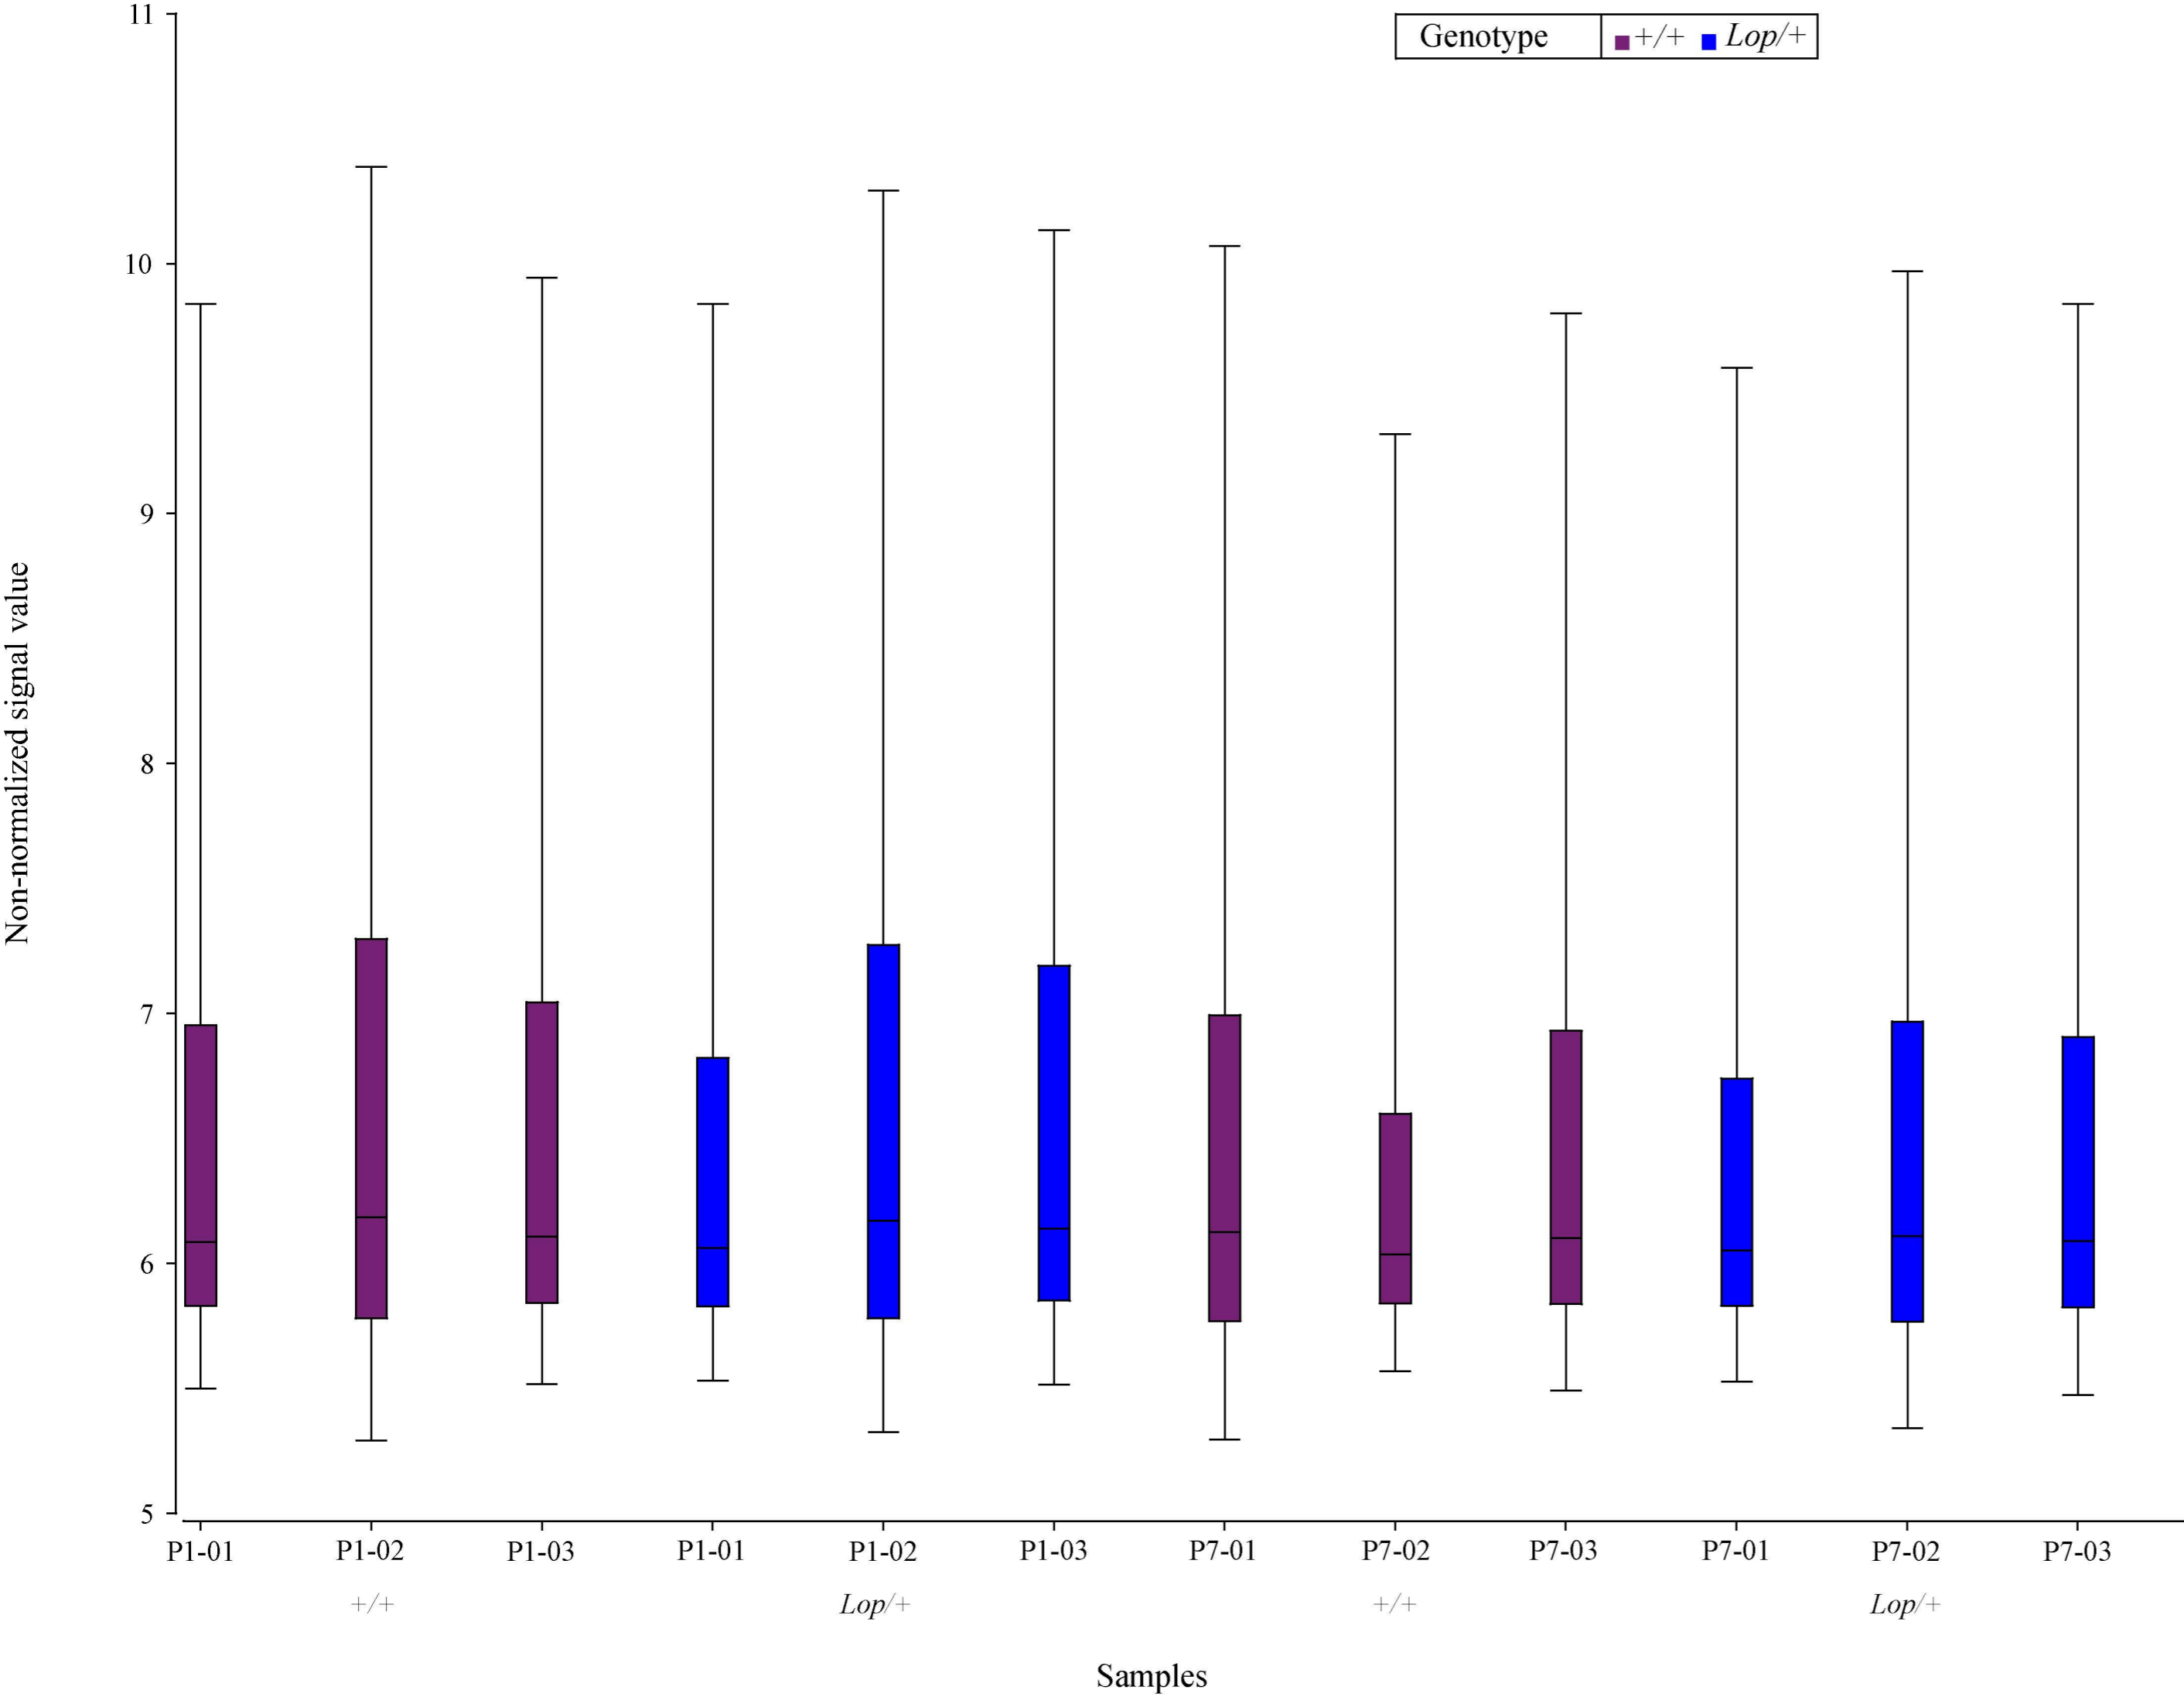

A

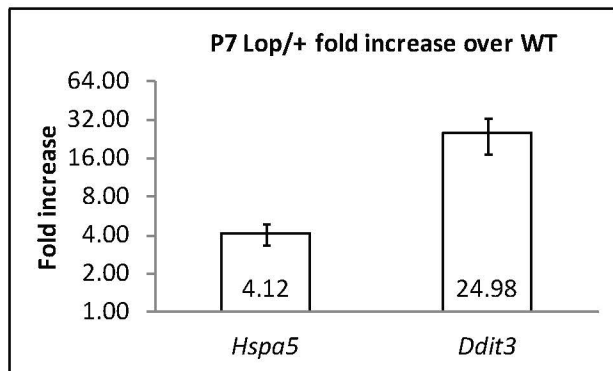

B

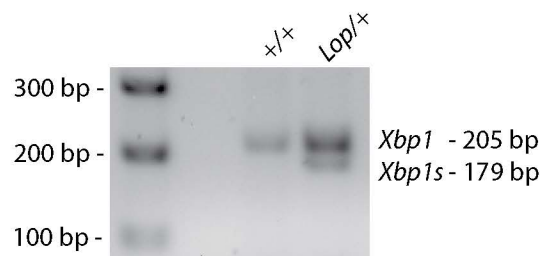

C

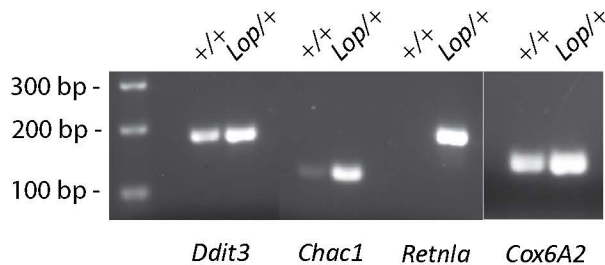

D

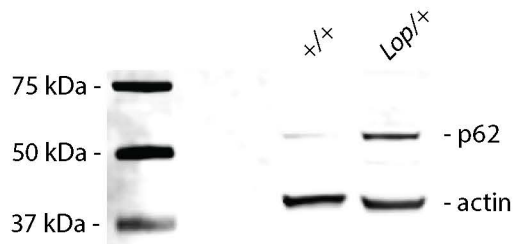

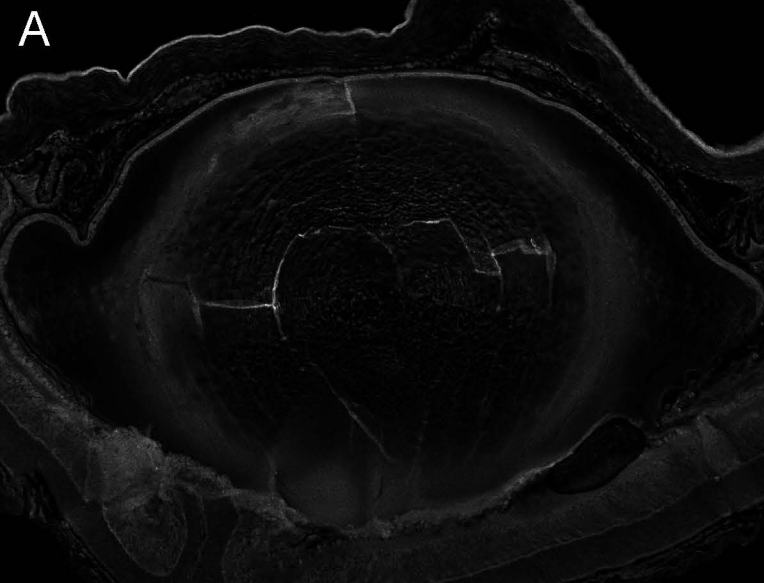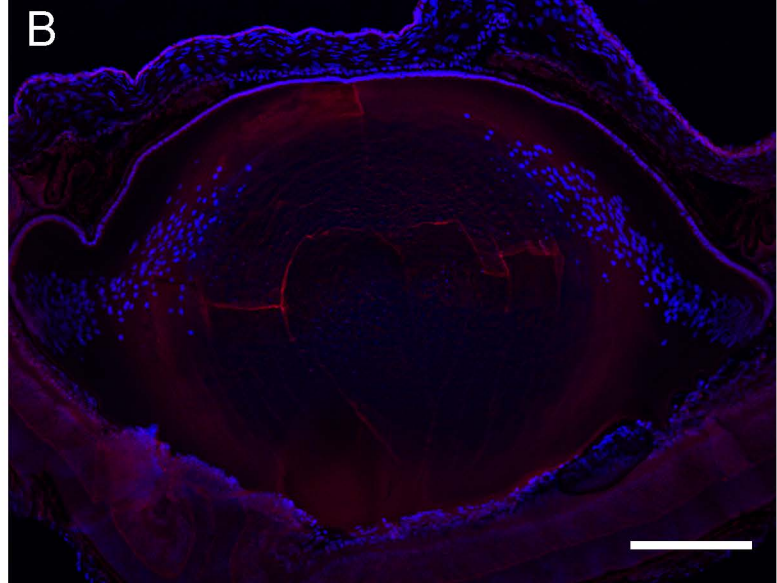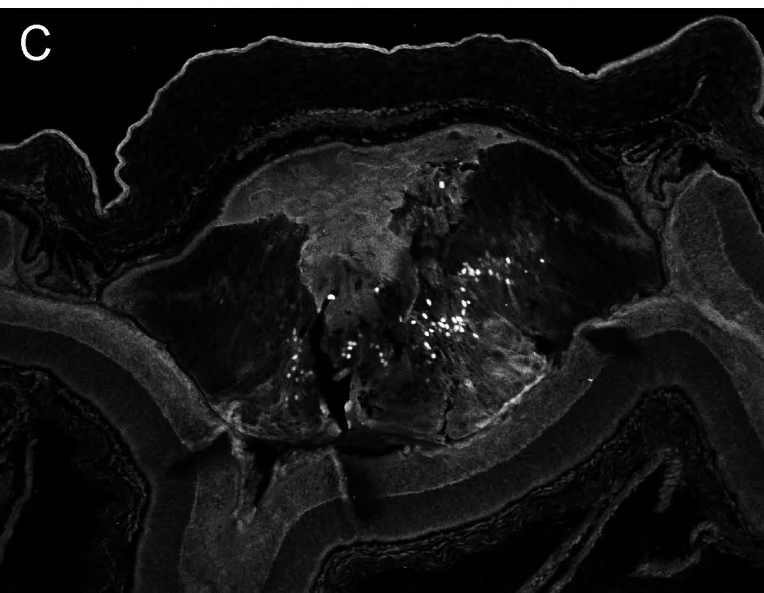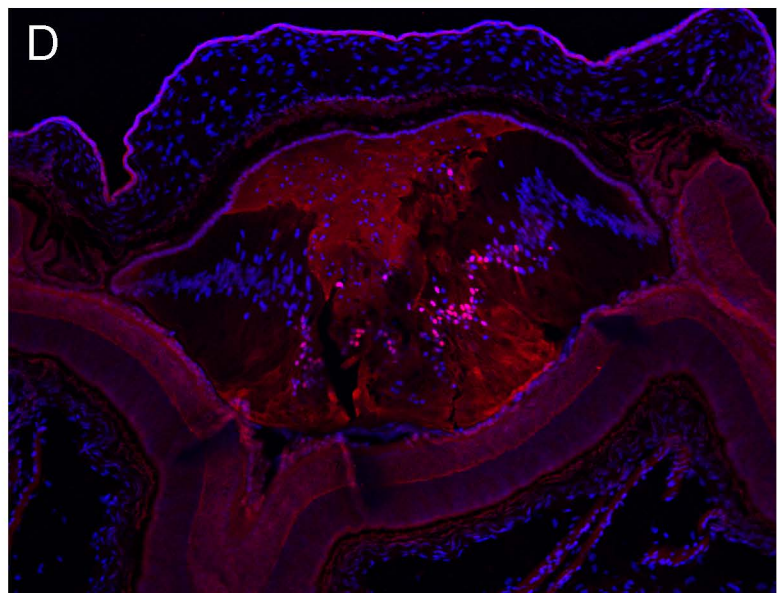

Supplemental Table 1

| Name       | Sequence (5' - 3')    | Amplicon size (bp)       |
|------------|-----------------------|--------------------------|
| Chac1 RTF  | CTGTGGATTTTCGGGTACGG  | 122                      |
| Chac1 RTR  | CCCCTATGGAAGGTGTCTCC  |                          |
| Cox6A2 RTF | CTGCTCCCTTAACTGCTGGAT | 128                      |
| Cox6A2 RTR | GATTGTGGAAAAGCGTGTGGT |                          |
| Ddit3 RTF  | CTGCCTTTCACCTTGGAGAC  | 178                      |
| Ddit3 RTR  | CTGTCAGCCAAGCTAGGGAC  |                          |
| Sqstm1 RTF | ATGTGGAACATGGAGGGAAGA | 294                      |
| Sqstm1 RTR | GGAGTTCACCTGTAGATGGGT |                          |
| Xbp1_RTf   | GAACCAGGAGTTAAGAACACG | 205/179                  |
| Xbp1_RTR   | AGGCAACAGTGTGAGAGTCC  |                          |
| MipUps-F   | AAGGGGTTAAGAGGCAGAGC  | 307 bp (Ups-F to 151G-R) |
| Mip151G-R  | CTGCACCAATGTAGCCAAGGC |                          |
| Mip151C-F  | TGGCTTTGGCCTTTGGCCTGC | 215 bp (151C-F to 345R)  |
| Mip345R    | GTTTCCTCGGACAGCTGGTGG | 481 bp (Ups-F to 345R)   |

Supplemental Table 2

| Gene symbol         | Fold-Change<br>(E14 * Lop/+ vs.<br>E14 * WT) | p-value (E14 *<br>Lop/+ vs. E14 *<br>WT) |
|---------------------|----------------------------------------------|------------------------------------------|
| <i>Birc7</i>        | 1.6945                                       | 0.46                                     |
| <i>mt-Nd4</i>       | 1.6872                                       | 0.37                                     |
| <i>LOC676420</i>    | 1.6774                                       | 0.34                                     |
| <i>mtDNA_ND2</i>    | 1.6322                                       | 0.54                                     |
| <i>Atp6v1b2</i>     | 1.6261                                       | 0.11                                     |
| <i>Nupr1</i>        | 1.6128                                       | 0.17                                     |
| <i>Hmox1</i>        | 1.5977                                       | 0.48                                     |
| <i>mtDNA_ND4</i>    | 1.5849                                       | 0.32                                     |
| <i>Ank2</i>         | 1.5777                                       | 0.16                                     |
| <i>LOC381283</i>    | 1.5701                                       | 0.35                                     |
| <i>mtDNA_ND5</i>    | 1.5406                                       | 0.34                                     |
| <i>Abi2</i>         | 1.5106                                       | 0.34                                     |
| <i>mtDNA_COXII</i>  | 1.4927                                       | 0.61                                     |
| <i>LOC100048638</i> | 1.4816                                       | 0.65                                     |
| <i>Stx11</i>        | 1.4702                                       | 0.60                                     |
| <i>Ndel1</i>        | 1.4671                                       | 0.36                                     |
| <i>Fat1</i>         | 1.4604                                       | 0.36                                     |
| <i>LOC385699</i>    | 1.4527                                       | 0.49                                     |
| <i>Prickle1</i>     | 1.4498                                       | 0.56                                     |
| <i>Scn11a</i>       | 1.4444                                       | 0.43                                     |
| <i>Rai14</i>        | 1.4414                                       | 0.34                                     |
| <i>lars</i>         | 1.4410                                       | 0.34                                     |
| <i>LOC100048105</i> | 1.4372                                       | 0.58                                     |
| <i>Lama1</i>        | 1.4367                                       | 0.48                                     |
| <i>mt-Nd1</i>       | 1.4335                                       | 0.69                                     |
| <i>Sqstm1</i>       | 1.4316                                       | 0.17                                     |
| <i>Dnase2b</i>      | 1.4290                                       | 0.49                                     |
| <i>Sema5a</i>       | 1.4258                                       | 0.57                                     |
| <i>mtDNA_ATP8</i>   | 1.4237                                       | 0.50                                     |
| <i>Shc1</i>         | 1.4221                                       | 0.46                                     |
| <i>Mboat1</i>       | 1.4194                                       | 0.40                                     |
| <i>Prdm16</i>       | 1.4185                                       | 0.24                                     |
| <i>LOC100043671</i> | 1.4183                                       | 0.28                                     |
| <i>Inpp5a</i>       | 1.4118                                       | 0.40                                     |
| <i>Scd2</i>         | 1.4085                                       | 0.50                                     |
| <i>Ubg</i>          | 1.4059                                       | 0.53                                     |
| <i>Ctnna1</i>       | 1.4046                                       | 0.34                                     |
| <i>Nid1</i>         | 1.3987                                       | 0.68                                     |
| <i>mt-Cytb</i>      | 1.3933                                       | 0.34                                     |
| <i>Frag1</i>        | 1.3929                                       | 0.39                                     |
| <i>Sema5a</i>       | 1.3893                                       | 0.65                                     |
| <i>Rnf145</i>       | 1.3874                                       | 0.16                                     |
| <i>Ccdc117</i>      | 1.3866                                       | 0.55                                     |
| <i>Spnb1</i>        | 1.3813                                       | 0.34                                     |

Supplemental Table 2

|                      |        |      |
|----------------------|--------|------|
| <i>LOC100044124</i>  | 1.3807 | 0.59 |
| <i>Lamc1</i>         | 1.3721 | 0.32 |
| <i>Col4a2</i>        | 1.3701 | 0.49 |
| <i>Snx18</i>         | 1.3695 | 0.71 |
| <i>Hectd1</i>        | 1.3686 | 0.32 |
| <i>Nisch</i>         | 1.3664 | 0.50 |
| <i>Actn2</i>         | 1.3648 | 0.69 |
| <i>Ftl1</i>          | 1.3629 | 0.54 |
| <i>Peg3</i>          | 1.3620 | 0.58 |
| <i>Tcp1</i>          | 1.3588 | 0.51 |
| <i>1110014020Rik</i> | 1.3581 | 0.46 |
| <i>Spna2</i>         | 1.3562 | 0.28 |
| <i>Slc7a11</i>       | 1.3531 | 0.42 |
| <i>Ube2o</i>         | 1.3528 | 0.71 |
| <i>LOC100048105</i>  | 1.3520 | 0.60 |
| <i>B3gnt5</i>        | 1.3493 | 0.72 |
| <i>Slc39a7</i>       | 1.3407 | 0.34 |
| <i>Sym</i>           | 1.3394 | 0.35 |
| <i>Frag1</i>         | 1.3357 | 0.52 |
| <i>Gbf1</i>          | 1.3343 | 0.57 |
| <i>Csnk1g3</i>       | 1.3316 | 0.45 |
| <i>LOC383099</i>     | 1.3305 | 0.72 |
| <i>0610010105Rik</i> | 1.3296 | 0.72 |
| <i>Zmym2</i>         | 1.3269 | 0.58 |
| <i>Eif5</i>          | 1.3253 | 0.57 |
| <i>0610040015Rik</i> | 1.3252 | 0.16 |
| <i>App</i>           | 1.3238 | 0.76 |
| <i>Herc2</i>         | 1.3220 | 0.35 |
| <i>Ccng1</i>         | 1.3208 | 0.57 |
| <i>Cnrip1</i>        | 1.3207 | 0.53 |
| <i>mtDNA_CytB</i>    | 1.3206 | 0.34 |
| <i>LOC100045882</i>  | 1.3205 | 0.55 |
| <i>Herpud1</i>       | 1.3200 | 0.78 |
| <i>Fads1</i>         | 1.3195 | 0.58 |
| <i>Tmbim6</i>        | 1.3195 | 0.57 |
| <i>Psmc1</i>         | 1.3185 | 0.46 |
| <i>Gadd45a</i>       | 1.3166 | 0.56 |
| <i>Igfbp5</i>        | 1.3162 | 0.69 |
| <i>Pbrm1</i>         | 1.3160 | 0.34 |
| <i>Ubap2</i>         | 1.3119 | 0.57 |
| <i>Hspa8</i>         | 1.3100 | 0.81 |
| <i>Efna5</i>         | 1.3095 | 0.47 |
| <i>Ccnd2</i>         | 1.3089 | 0.55 |
| <i>Chordc1</i>       | 1.3085 | 0.59 |
| <i>Sept8</i>         | 1.3079 | 0.36 |
| <i>Pappa</i>         | 1.3070 | 0.47 |
| <i>Kif1b</i>         | 1.3054 | 0.43 |



Supplemental Table 2

|                      |         |      |
|----------------------|---------|------|
| <i>Mast4</i>         | 1.3048  | 0.34 |
| <i>Sec16a</i>        | 1.3037  | 0.46 |
| <i>Spnb3</i>         | 1.3022  | 0.45 |
| <i>LOC100048105</i>  | 1.3018  | 0.65 |
| <i>LOC100041500</i>  | -1.3024 | 0.40 |
| <i>2310039H08Rik</i> | -1.3114 | 0.46 |
| <i>1810037I17Rik</i> | -1.3122 | 0.56 |
| <i>Hist1h1c</i>      | -1.3170 | 0.80 |
| <i>2210013O21Rik</i> | -1.3171 | 0.36 |
| <i>Hist1h1c</i>      | -1.3277 | 0.75 |
| <i>Esam</i>          | -1.3281 | 0.43 |
| <i>Hbb-bh1</i>       | -1.3283 | 0.35 |
| <i>Npm3</i>          | -1.3287 | 0.36 |
| <i>Fez1</i>          | -1.3349 | 0.58 |
| <i>Hbb-b1</i>        | -1.3418 | 0.81 |
| <i>Hba-x</i>         | -1.3470 | 0.59 |
| <i>Rtn1</i>          | -1.3472 | 0.76 |
| <i>E130112E08Rik</i> | -1.3473 | 0.80 |
| <i>Sox9</i>          | -1.3525 | 0.46 |
| <i>2410006H16Rik</i> | -1.3572 | 0.45 |
| <i>0610007P14Rik</i> | -1.3585 | 0.34 |
| <i>Tcfap2b</i>       | -1.3627 | 0.67 |
| <i>Mgp</i>           | -1.3727 | 0.46 |
| <i>Acta2</i>         | -1.3761 | 0.69 |
| <i>0610006I08Rik</i> | -1.3775 | 0.39 |
| <i>Stfa1</i>         | -1.3804 | 0.94 |
| <i>Mt1</i>           | -1.3905 | 0.83 |
| <i>Stfa1</i>         | -1.3922 | 0.95 |
| <i>Npm3-ps1</i>      | -1.4129 | 0.17 |
| <i>Ttr</i>           | -1.4179 | 0.77 |
| <i>Cdk5r1</i>        | -1.4338 | 0.65 |
| <i>Slc4a1</i>        | -1.4395 | 0.40 |
| <i>EG434402</i>      | -1.4461 | 0.44 |
| <i>Sox11</i>         | -1.4570 | 0.57 |
| <i>Eraf</i>          | -1.4763 | 0.36 |
| <i>S100a8</i>        | -1.5387 | 0.66 |
| <i>Hbb-b1</i>        | -1.6495 | 0.34 |
| <i>LOC100045403</i>  | -1.6523 | 0.72 |
| <i>Hbb-y</i>         | -1.6677 | 0.74 |
| <i>Hbb-y</i>         | -1.9486 | 0.57 |

Supplemental Table 3

| ILMN_Gene     | log2FC<br>(Het vs<br>WT) | Fold Change<br>(Het vs WT) | CI.L   | CI.R   | AveExpr | t       | P.Value  | adj.P.Val | B       | DEFINITION                                                                                                                                              | ENTREZ_GEN<br>E_ID | CYTOBAND |
|---------------|--------------------------|----------------------------|--------|--------|---------|---------|----------|-----------|---------|---------------------------------------------------------------------------------------------------------------------------------------------------------|--------------------|----------|
| CHAC1         | 6.3956                   | 84.1904                    | 5.8633 | 6.9278 | 8.9723  | 26.0267 | 2.20E-12 | 6.73E-09  | 18.0984 | Mus musculus ChaC, cation transport regulator-like 1 (E. coli) (Chac1), mRNA.                                                                           | 69065              | 2qE5     |
| COX6A2        | 4.9092                   | 30.0486                    | 4.5625 | 5.2559 | 11.4451 | 30.6720 | 2.83E-13 | 1.30E-09  | 19.6262 | Mus musculus cytochrome c oxidase, subunit VI a, polypeptide 2 (Cox6a2), nuclear gene encoding mitochondrial protein, mRNA.                             | 12862              | 7qF3     |
| RETNLA        | 4.0537                   | 16.6070                    | 3.4747 | 4.6327 | 7.8015  | 15.1643 | 1.68E-09 | 9.09E-07  | 12.2947 | Mus musculus resistin like alpha (Retnla), mRNA.                                                                                                        | 57262              | 16qB5    |
| DDIT3         | 3.5623                   | 11.8131                    | 2.8715 | 4.2532 | 8.7083  | 11.1690 | 6.30E-08 | 1.38E-05  | 8.7656  | Mus musculus DNA-damage inducible transcript 3 (Ddit3), mRNA.                                                                                           | 13198              | 10qD3    |
| EMP1          | 3.4874                   | 11.2155                    | 2.5184 | 4.4564 | 9.0782  | 7.7955  | 3.48E-06 | 1.97E-04  | 4.7089  | Mus musculus epithelial membrane protein 1 (Emp1), mRNA.                                                                                                | 13730              | 6qG1     |
| FOS           | 3.4287                   | 10.7685                    | 2.9345 | 3.9230 | 7.2473  | 15.0261 | 1.88E-09 | 9.58E-07  | 12.1899 | Mus musculus FBJ osteosarcoma oncogene (Fos), mRNA.                                                                                                     | 14281              | 12qD2    |
| IL4           | 3.0930                   | 8.5327                     | 2.4329 | 3.7531 | 9.7319  | 10.1483 | 1.89E-07 | 2.79E-05  | 7.6635  | Mus musculus interleukin 4 (Il4), mRNA.                                                                                                                 | 16189              | 11qB1.3  |
| HYAL1         | 3.0694                   | 8.3944                     | 2.7829 | 3.3559 | 8.3377  | 23.2039 | 9.17E-12 | 1.68E-08  | 16.9505 | Mus musculus hyaluronoglucosaminidase 1 (Hyal1), mRNA.                                                                                                  | 15586              | 9qF1     |
| PLK3          | 3.0636                   | 8.3606                     | 2.8505 | 3.2768 | 8.8272  | 31.1298 | 2.35E-13 | 1.30E-09  | 19.7567 | Mus musculus polo-like kinase 3 (Plk3), mRNA                                                                                                            | 12795              | 4 D1     |
| ACTG2         | 3.0576                   | 8.3259                     | 2.1268 | 3.9884 | 6.1892  | 7.1150  | 9.05E-06 | 3.97E-04  | 3.7290  | Mus musculus actin, gamma 2, smooth muscle, enteric (Actg2), mRNA.                                                                                      | 11468              | 6qC3     |
| FAM115C       | 3.0097                   | 8.0541                     | 2.7514 | 3.2681 | 7.8521  | 25.2358 | 3.23E-12 | 7.41E-09  | 17.7958 | Mus musculus family with sequence similarity 115, member C (Fam115c), mRNA.                                                                             | 232748             | 6qB2.1   |
| EAR11         | 2.9368                   | 7.6568                     | 2.3975 | 3.4760 | 6.7401  | 11.7968 | 3.33E-08 | 8.26E-06  | 9.3976  | Mus musculus eosinophil-associated, ribonuclease A family, member 11 (Ear11), mRNA.                                                                     | 93726              | 14qC1    |
| TNFRSF12A     | 2.9116                   | 7.5247                     | 2.5043 | 3.3190 | 8.7249  | 15.4821 | 1.31E-09 | 8.59E-07  | 12.5316 | Mus musculus tumor necrosis factor receptor superfamily, member 12a (Tnfrsf12a), mRNA.                                                                  | 27279              | 17qA3.3  |
| CCK           | 2.7843                   | 6.8889                     | 2.1763 | 3.3922 | 6.9235  | 9.9196  | 2.45E-07 | 3.31E-05  | 7.4028  | Mus musculus cholecystokinin (Cck), mRNA.                                                                                                               | 12424              | 9qF4     |
| ARG1          | 2.6286                   | 6.1843                     | 1.9731 | 3.2842 | 6.2751  | 8.6851  | 1.08E-06 | 9.53E-05  | 5.9007  | Mus musculus arginase 1, liver (Arg1), mRNA.                                                                                                            | 11846              | 10qA4    |
| ADRB2         | 2.5858                   | 6.0033                     | 2.2066 | 2.9650 | 7.1593  | 14.7699 | 2.31E-09 | 1.01E-06  | 11.9928 | Mus musculus adrenergic receptor, beta 2 (Adrb2), mRNA.                                                                                                 | 11555              | 18qE1    |
| CCL7          | 2.5779                   | 5.9705                     | 2.1876 | 2.9681 | 6.8993  | 14.3088 | 3.39E-09 | 1.41E-06  | 11.6285 | Mus musculus chemokine (C-C motif) ligand 7 (Ccl7), mRNA.                                                                                               | 20306              | 11qC     |
| 1700029G01RIK | 2.4831                   | 5.5908                     | 2.0835 | 2.8826 | 7.4774  | 13.4607 | 7.03E-09 | 2.80E-06  | 10.9242 | Mus musculus RIKEN cDNA 1700029G01 gene (1700029G01Rik), mRNA.                                                                                          | 66938              | 4qD2.2   |
| SQSTM1        | 2.3882                   | 5.2352                     | 2.1249 | 2.6515 | 11.8187 | 19.6456 | 7.18E-11 | 7.31E-08  | 15.1906 | Mus musculus sequestosome 1 (Sqstm1), mRNA.                                                                                                             | 18412              | 11qB1.3  |
| ATF3          | 2.3716                   | 5.1752                     | 1.7337 | 3.0095 | 6.6251  | 8.0525  | 2.46E-06 | 1.59E-04  | 5.0632  | Mus musculus activating transcription factor 3 (Atf3), mRNA.                                                                                            | 11910              | 1qH6     |
| TNFAIP8       | 2.2823                   | 4.8647                     | 2.0655 | 2.4992 | 8.5861  | 22.8002 | 1.14E-11 | 1.74E-08  | 16.7699 | Mus musculus tumor necrosis factor, alpha-induced protein 8 (Tnfaip8), mRNA.                                                                            | 106869             | 18qD1    |
| GPNMB         | 2.2727                   | 4.8322                     | 1.6274 | 2.9180 | 6.9411  | 7.6286  | 4.37E-06 | 2.28E-04  | 4.4742  | Mus musculus glycoprotein (transmembrane) nmb (Gpnmb), mRNA.                                                                                            | 93695              | 6qB2.3   |
| LGALS3        | 2.2499                   | 4.7565                     | 1.6347 | 2.8651 | 10.2989 | 7.9213  | 2.93E-06 | 1.82E-04  | 4.8834  | Mus musculus lectin, galactose binding, soluble 3 (Lgals3), mRNA.                                                                                       | 16854              | 14qC1    |
| TRIB3         | 2.2324                   | 4.6993                     | 1.6538 | 2.8110 | 6.6051  | 8.3573  | 1.65E-06 | 1.23E-04  | 5.4728  | Mus musculus tribbles homolog 3 (Drosophila) (Trib3), mRNA.                                                                                             | 228775             | 2qG3     |
| TSPAN10       | 2.1938                   | 4.5751                     | 1.7957 | 2.5919 | 7.2805  | 11.9357 | 2.91E-08 | 7.62E-06  | 9.5331  | Mus musculus tetraspanin 10 (Tspan10), mRNA.                                                                                                            | 208634             | 11qE2    |
| EGR1          | 2.1331                   | 4.3867                     | 1.5315 | 2.7348 | 7.7093  | 7.6796  | 4.07E-06 | 2.19E-04  | 4.5463  | Mus musculus early growth response 1 (Egr1), mRNA.                                                                                                      | 13653              | 18qB1    |
| XBP1          | 2.0525                   | 4.1483                     | 1.7623 | 2.3427 | 10.8416 | 15.3187 | 1.49E-09 | 9.09E-07  | 12.4105 | Mus musculus X-box binding protein 1 (Xbp1), mRNA.                                                                                                      | 22433              | 11qA1    |
| LOC100046232  | 2.0065                   | 4.0180                     | 1.6739 | 2.3390 | 8.7354  | 13.0680 | 9.99E-09 | 3.27E-06  | 10.5820 | PREDICTED: Mus musculus similar to NFIL3/E4BP4 transcription factor (LOC100046232), mRNA (NB: Withdrawn by NCBI - not predicted in a later annotation). | 100046232          |          |
| C1QB          | 2.0010                   | 4.0029                     | 1.6034 | 2.3987 | 6.7814  | 10.8993 | 8.36E-08 | 1.61E-05  | 8.4837  | Mus musculus complement component 1, q subcomponent, beta polypeptide (C1qb), mRNA.                                                                     | 12260              | 4qD3     |
| PAQR7         | 1.9833                   | 3.9540                     | 1.7396 | 2.2271 | 9.3063  | 17.6239 | 2.72E-10 | 2.26E-07  | 13.9945 | Mus musculus progesterin and adipoQ receptor family member VII (Paqr7), mRNA.                                                                           | 71904              | 4qD3     |
| CD74          | 1.9057                   | 3.7468                     | 1.4238 | 2.3875 | 6.5739  | 8.5661  | 1.26E-06 | 1.03E-04  | 5.7468  | Mus musculus CD74 antigen (invariant polypeptide of major histocompatibility complex, class II antigen-associated) (Cd74), transcript variant 1, mRNA.  | 16149              | 18qE1    |
| AXUD1         | 1.9032                   | 3.7403                     | 1.5228 | 2.2835 | 6.7958  | 10.8379 | 8.92E-08 | 1.67E-05  | 8.4186  | Mus musculus AXIN1 up-regulated 1 (Axud1), mRNA.                                                                                                        | 215418             | 9qF4     |
| NAT6          | 1.8873                   | 3.6993                     | 1.6386 | 2.1359 | 7.5829  | 16.4408 | 6.33E-10 | 4.84E-07  | 13.2139 | Mus musculus N-acetyltransferase 6 (Nat6), mRNA.                                                                                                        | 56441              | 9qF1     |
| SRXN1         | 1.8781                   | 3.6759                     | 1.6246 | 2.1317 | 7.1891  | 16.0448 | 8.51E-10 | 6.01E-07  | 12.9378 | Mus musculus sulfiredoxin 1 homolog (S. cerevisiae) (Srxn1), mRNA.                                                                                      | 76650              | 2qG3     |
| CHKB          | 1.8723                   | 3.6612                     | 1.5300 | 2.2146 | 7.8379  | 11.8485 | 3.17E-08 | 8.07E-06  | 9.4482  | Mus musculus choline kinase beta (Chkb), mRNA.                                                                                                          | 12651              | 15qE3    |
| ST8SIA5       | 1.8556                   | 3.6190                     | 1.2633 | 2.4478 | 6.1794  | 6.7863  | 1.47E-05 | 5.58E-04  | 3.2333  | Mus musculus ST8 alpha-N-acetylneuraminidase alpha-2,8-sialyltransferase 5 (St8sia5), transcript variant 2, mRNA.                                       | 225742             | 18qE3    |
| MMD           | 1.8408                   | 3.5820                     | 1.6496 | 2.0319 | 10.2355 | 20.8553 | 3.44E-11 | 4.50E-08  | 15.8338 | Mus musculus monocyte to macrophage differentiation-associated (Mmd), mRNA.                                                                             | 67468              | 11qC     |
| TGFB1         | 1.7841                   | 3.4441                     | 1.4639 | 2.1043 | 6.4364  | 12.0701 | 2.55E-08 | 7.12E-06  | 9.6627  | Mus musculus transforming growth factor, beta induced (Tgfb1), mRNA.                                                                                    | 21810              | 13qB1    |
| SERPINA3G     | 1.7387                   | 3.3373                     | 1.1872 | 2.2901 | 6.2133  | 6.8294  | 1.38E-05 | 5.33E-04  | 3.2991  | Mus musculus serine (or cysteine) peptidase inhibitor, clade A, member 3G (Serpina3g), mRNA.                                                            | 20715              | 12qE     |
| EAR2          | 1.7384                   | 3.3366                     | 1.1983 | 2.2784 | 6.7931  | 6.9723  | 1.11E-05 | 4.54E-04  | 3.5156  | Mus musculus eosinophil-associated, ribonuclease A family, member 2 (Ear2), mRNA.                                                                       | 13587              | 14qC1    |
| TFRC          | 1.6740                   | 3.1910                     | 1.3140 | 2.0340 | 9.0168  | 10.0715 | 2.07E-07 | 2.91E-05  | 7.5765  | Mus musculus transferrin receptor (Tfrc), mRNA.                                                                                                         | 22042              | 16qB3    |
| EAR4          | 1.6542                   | 3.1475                     | 1.1140 | 2.1944 | 5.7854  | 6.6325  | 1.85E-05 | 6.80E-04  | 2.9962  | Mus musculus eosinophil-associated, ribonuclease A family, member 4 (Ear4), mRNA.                                                                       | 53877              |          |
| SERPINA3N     | 1.6494                   | 3.1370                     | 1.0588 | 2.2400 | 6.9368  | 6.0492  | 4.57E-05 | 1.36E-03  | 2.0666  | Mus musculus serine (or cysteine) peptidase inhibitor, clade A, member 3N (Serpina3n), mRNA.                                                            | 20716              | 12qE     |
| GCH1          | 1.6073                   | 3.0468                     | 1.1929 | 2.0217 | 6.9510  | 8.4008  | 1.55E-06 | 1.18E-04  | 5.5304  | Mus musculus GTP cyclohydrolase 1 (Gch1), mRNA                                                                                                          | NA                 |          |
| 1700003F12RIK | 1.5979                   | 3.0269                     | 1.3171 | 1.8786 | 8.3389  | 12.3275 | 1.99E-08 | 5.89E-06  | 9.9069  | Mus musculus RIKEN cDNA 1700003F12 gene (1700003F12Rik), mRNA. XM_976207                                                                                | 75480              | 2qH1     |
| LOC641240     | 1.5939                   | 3.0187                     | 1.1737 | 2.0141 | 6.6760  | 8.2165  | 1.98E-06 | 1.37E-04  | 5.2850  | PREDICTED: Mus musculus similar to MHC class II antigen beta chain (LOC641240), mRNA.                                                                   | 641240             |          |
| DNAJB9        | 1.5933                   | 3.0174                     | 1.1448 | 2.0418 | 7.0648  | 7.6942  | 3.99E-06 | 2.17E-04  | 4.5669  | Mus musculus Dnaj (Hsp40) homolog, subfamily B, member 9 (Dnajb9), mRNA.                                                                                | 27362              | 12qB3    |
| LMNA          | 1.5294                   | 2.8867                     | 1.1950 | 1.8638 | 8.5253  | 9.9074  | 2.49E-07 | 3.31E-05  | 7.3887  | Mus musculus lamin A (Lmna), transcript variant 1, mRNA.                                                                                                | 16905              | 3qF1     |
| SLC7A3        | 1.5279                   | 2.8837                     | 1.1143 | 1.9416 | 6.4247  | 8.0007  | 2.63E-06 | 1.69E-04  | 4.9925  | Mus musculus solute carrier family 7 (cationic amino acid transporter, y+ system), member 3 (Slc7a3), mRNA.                                             | 11989              | XqC3     |
| DHX32         | 1.4946                   | 2.8179                     | 1.2059 | 1.7834 | 13.2014 | 11.2113 | 6.03E-08 | 1.35E-05  | 8.8093  | Mus musculus DEAH (Asp-Glu-Ala-His) box polypeptide 32 (Dhx32), mRNA.                                                                                   | 101437             | 7qF3     |
| ASNS          | 1.4920                   | 2.8127                     | 1.1823 | 1.8017 | 8.0548  | 10.4343 | 1.38E-07 | 2.22E-05  | 7.9821  | Mus musculus asparagine synthetase (Asns), mRNA.                                                                                                        | 27053              | 6qA1     |
| DDIT4         | 1.4844                   | 2.7981                     | 1.1253 | 1.8436 | 8.8568  | 8.9520  | 7.74E-07 | 7.48E-05  | 6.2397  | Mus musculus DNA-damage-inducible transcript 4 (Ddit4), mRNA.                                                                                           | 74747              | 10qB4    |
| JUNB          | 1.4783                   | 2.7861                     | 1.1307 | 1.8258 | 6.9352  | 9.2123  | 5.63E-07 | 5.74E-05  | 6.5626  | Mus musculus Jun-B oncogene (Junb), mRNA.                                                                                                               | 16477              | 8qC3     |
| ENO2          | 1.4513                   | 2.7346                     | 1.2005 | 1.7021 | 8.6981  | 12.5336 | 1.64E-08 | 5.00E-06  | 10.0988 | Mus musculus enolase 2, gamma neuronal (Eno2), mRNA.                                                                                                    | 13807              | 6qF2     |
| C1QC          | 1.4280                   | 2.6908                     | 0.9756 | 1.8804 | 6.6932  | 6.8365  | 1.36E-05 | 5.31E-04  | 3.3100  | Mus musculus complement component 1, q subcomponent, C chain (C1qc), mRNA.                                                                              | 12262              | 4qD3     |
| H2-AB1        | 1.4279                   | 2.6905                     | 0.9393 | 1.9164 | 6.3753  | 6.3306  | 2.93E-05 | 9.65E-04  | 2.5212  | Mus musculus histocompatibility 2, class II antigen A, beta 1 (H2-Ab1), mRNA.                                                                           | 14961              | 17qB1    |
| ALDOA         | 1.4051                   | 2.6484                     | 1.0999 | 1.7103 | 11.6439 | 9.9725  | 2.31E-07 | 3.16E-05  | 7.4636  | Mus musculus aldolase A, fructose-bisphosphate (Aldoa), mRNA.                                                                                           | 11674              | 7qF3     |
| FHL2          | 1.3934                   | 2.6269                     | 1.1213 | 1.6654 | 5.7420  | 11.0942 | 6.81E-08 | 1.45E-05  | 8.6881  | Mus musculus four and a half LIM domains 2 (Fhl2), mRNA.                                                                                                | 14200              | 1qB      |
| LYZ           | 1.3869                   | 2.6152                     | 1.0184 | 1.7554 | 7.5281  | 8.1526  | 2.15E-06 | 1.47E-04  | 5.1990  | Mus musculus lysozyme (Lyz), mRNA.                                                                                                                      | 17110              | 10qD2    |
| I830077J02RIK | 1.3849                   | 2.6116                     | 0.9279 | 1.8420 | 6.2606  | 6.5633  | 2.05E-05 | 7.38E-04  | 2.8884  | Mus musculus RIKEN cDNA I830077J02 gene (I830077J02Rik), mRNA.                                                                                          | 433638             | 3qF2.2   |
| CD52          | 1.3831                   | 2.6082                     | 0.9506 | 1.8156 | 6.5935  | 6.9269  | 1.19E-05 | 4.77E-04  | 3.4472  | Mus musculus CD52 antigen (Cd52), mRNA.                                                                                                                 | 23833              | 4qD3     |
| KLF4          | 1.3431                   | 2.5370                     | 0.9535 | 1.7327 | 6.2308  | 7.4673  | 5.47E-06 | 2.70E-04  | 4.2439  | Mus musculus Kruppel-like factor 4 (gut) (Klf4), mRNA.                                                                                                  | 16600              | 4qB3     |
| SYN2          | 1.3357                   | 2.5240                     | 0.9690 | 1.7024 | 8.0689  | 7.8896  | 3.06E-06 | 1.87E-04  | 4.8396  | Mus musculus synapsin II (Syn2), mRNA.                                                                                                                  | 20965              | 6qE3     |
| PDK1          | 1.3222                   | 2.5004                     | 0.9952 | 1.6492 | 7.6288  | 8.7572  | 9.87E-07 | 8.87E-05  | 5.9931  | Mus musculus pyruvate dehydrogenase kinase, isoenzyme 1 (Pdk1), nuclear gene encoding mitochondrial protein, mRNA.                                      | 228026             | 2qC3     |
| CEBPB         | 1.3209                   | 2.4982                     | 0.6968 | 1.9450 | 6.9835  | 4.5844  | 5.46E-04 | 8.75E-03  | -0.4747 | Mus musculus CCAAT/enhancer binding protein (C/EBP), beta (Cebpb), mRNA.                                                                                | 12608              | 2qH3     |
| UAP1L1        | 1.3035                   | 2.4683                     | 1.0127 | 1.5943 | 7.3072  | 9.7087  | 3.13E-07 | 3.93E-05  | 7.1578  | Mus musculus UDP-N-acetylglucosamine pyrophosphorylase 1-like 1 (Uap1l1), mRNA. XM_918982                                                               | 227620             | 2qA3     |

Supplemental Table 3

|                    |         |         |         |         |         |          |          |          |         |                                                                                                                                |        |         |
|--------------------|---------|---------|---------|---------|---------|----------|----------|----------|---------|--------------------------------------------------------------------------------------------------------------------------------|--------|---------|
| ZFP36              | 1.3008  | 2.4637  | 0.8882  | 1.7135  | 9.0024  | 6.8282   | 1.38E-05 | 5.33E-04 | 3.2973  | Mus musculus zinc finger protein 36 (Zfp36), mRNA.                                                                             | 22695  | 7qA3    |
| RGS16              | 1.2938  | 2.4517  | 0.9349  | 1.6527  | 6.9475  | 7.8087   | 3.41E-06 | 1.95E-04 | 4.7273  | Mus musculus regulator of G-protein signaling 16 (Rgs16), mRNA.                                                                | 19734  | 1qG3    |
| TMEM39A            | 1.2567  | 2.3894  | 0.9481  | 1.5652  | 8.1366  | 8.8220   | 9.10E-07 | 8.42E-05 | 6.0756  | Mus musculus transmembrane protein 39a (Tmem39a), mRNA.                                                                        | 67846  | 16qB4   |
| HSD17B12           | 1.2277  | 2.3419  | 0.8901  | 1.5653  | 8.5929  | 7.8777   | 3.11E-06 | 1.87E-04 | 4.8231  | Mus musculus hydroxysteroid (17-beta) dehydrogenase 12 (Hsd17b12), mRNA.                                                       | 56348  | 2qE1    |
| CLIC4              | 1.2229  | 2.3341  | 0.8617  | 1.5841  | 7.9386  | 7.3340   | 6.61E-06 | 3.11E-04 | 4.0510  | Mus musculus chloride intracellular channel 4 (mitochondrial) (Clic4), nuclear gene encoding mitochondrial protein, mRNA.      | 29876  | 4qD3    |
| GAL                | 1.2061  | 2.3071  | 0.8109  | 1.6013  | 5.7952  | 6.6100   | 1.91E-05 | 6.96E-04 | 2.9612  | Mus musculus galanin (Gal), mRNA.                                                                                              | 14419  | 19qA    |
| LYZ2               | 1.1850  | 2.2736  | 0.6255  | 1.7445  | 5.5796  | 4.5878   | 5.42E-04 | 8.73E-03 | -0.4685 | Mus musculus lysozyme 2 (Lyz2), mRNA.                                                                                          | 17105  | 10qD2   |
| CD68               | 1.1631  | 2.2394  | 0.7601  | 1.5661  | 6.2394  | 6.2520   | 3.32E-05 | 1.07E-03 | 2.3953  | Mus musculus CD68 antigen (Cd68), mRNA.                                                                                        | 12514  | 11qB3   |
| LAPTM5             | 1.1623  | 2.2382  | 0.8047  | 1.5200  | 7.7617  | 7.0398   | 1.01E-05 | 4.23E-04 | 3.6170  | Mus musculus lysosomal-associated protein transmembrane 5 (Laptm5), mRNA.                                                      | 16792  | 4qD2.3  |
| VWF                | 1.1448  | 2.2111  | 0.7512  | 1.5383  | 6.7804  | 6.3006   | 3.07E-05 | 9.96E-04 | 2.4733  | Mus musculus Von Willebrand factor homolog (Vwf), mRNA.                                                                        | 22371  | 6qF3    |
| RNF145             | 1.1377  | 2.2002  | 0.8946  | 1.3807  | 8.5742  | 10.1390  | 1.91E-07 | 2.79E-05 | 7.6529  | Mus musculus ring finger protein 145 (Rnf145), mRNA.                                                                           | 74315  | 11qB1.1 |
| LITAF              | 1.1333  | 2.1936  | 0.8981  | 1.3685  | 10.0450 | 10.4359  | 1.38E-07 | 2.22E-05 | 7.9839  | Mus musculus LPS-induced TN factor (Litaf), mRNA.                                                                              | 56722  | 16qA1   |
| FAM129B            | 1.1273  | 2.1844  | 0.8784  | 1.3762  | 8.9763  | 9.8092   | 2.79E-07 | 3.60E-05 | 7.2751  | Mus musculus family with sequence similarity 129, member B (Fam129b), mRNA.                                                    | 227737 | 2qB     |
| CAR9               | 1.1184  | 2.1711  | 0.8007  | 1.4361  | 6.1784  | 7.6253   | 4.39E-06 | 2.28E-04 | 4.4695  | Mus musculus carbonic anhydrase 9 (Car9), mRNA.                                                                                | 230099 | 4qB1    |
| CD9                | 1.0977  | 2.1401  | 0.7936  | 1.4018  | 7.2358  | 7.8195   | 3.36E-06 | 1.95E-04 | 4.7424  | Mus musculus CD9 antigen (Cd9), mRNA                                                                                           | NA     |         |
| CDS1               | 1.0965  | 2.1384  | 0.8157  | 1.3774  | 6.8561  | 8.4568   | 1.45E-06 | 1.12E-04 | 5.6040  | Mus musculus CDP-diacylglycerol synthase 1 (Cds1), mRNA.                                                                       | 74596  | 5qE4    |
| P4HB               | 1.0849  | 2.1212  | 0.7953  | 1.3745  | 11.2015 | 8.1149   | 2.26E-06 | 1.50E-04 | 5.1480  | Mus musculus prolyl 4-hydroxylase, beta polypeptide (P4hb), mRNA.                                                              | 18453  | 11qE2   |
| FHL1               | 1.0822  | 2.1173  | 0.8814  | 1.2830  | 10.3575 | 11.6748  | 3.76E-08 | 9.08E-06 | 9.2774  | Mus musculus four and a half LIM domains 1 (Fhl1), transcript variant 2, mRNA.                                                 | 14199  | XqA5    |
| FBXL13             | 1.0798  | 2.1137  | 0.8167  | 1.3428  | 6.9865  | 8.8915   | 8.35E-07 | 7.89E-05 | 6.1636  | Mus musculus F-box and leucine-rich repeat protein 13 (Fbxl13), mRNA.                                                          | 320118 | 5qA3    |
| SLC6A17            | 1.0752  | 2.1069  | 0.6820  | 1.4683  | 8.2845  | 5.9230   | 5.59E-05 | 1.59E-03 | 1.8592  | Mus musculus solute carrier family 6 (neurotransmitter transporter), member 17 (Slc6a17), mRNA.                                | 229706 | 3qF2.3  |
| FAM102A            | 1.0626  | 2.0887  | 0.8479  | 1.2774  | 8.2218  | 10.7180  | 1.01E-07 | 1.76E-05 | 8.2905  | Mus musculus family with sequence similarity 102, member A (Fam102a), mRNA.                                                    | 98952  | 2qB     |
| PRNP               | 1.0603  | 2.0854  | 0.7923  | 1.3283  | 10.5656 | 8.5689   | 1.25E-06 | 1.03E-04 | 5.7504  | Mus musculus prion protein (Prnp), mRNA.                                                                                       | 19122  | 2qF2    |
| HERPUD1            | 1.0548  | 2.0775  | 0.7226  | 1.3871  | 10.7879 | 6.8763   | 1.28E-05 | 5.05E-04 | 3.3705  | Mus musculus homocysteine-inducible, endoplasmic reticulum stress-inducible, ubiquitin-like domain member 1 (Herpud1), mRNA.   | 64209  | 8qC5    |
| CPFB1              | 1.0548  | 2.0774  | 0.8423  | 1.2674  | 7.0079  | 10.7486  | 9.81E-08 | 1.76E-05 | 8.3234  | Mus musculus cytoplasmic polyadenylation element binding protein 1 (Cpeb1), mRNA.                                              | 12877  | 7qD3    |
| MSI2               | 1.0547  | 2.0773  | 0.8734  | 1.2360  | 8.4632  | 12.6038  | 1.53E-08 | 4.85E-06 | 10.1635 | Mus musculus Musashi homolog 2 (Drosophila) (Msi2), mRNA.                                                                      | 76626  | 11qC    |
| CKMT2              | 1.0458  | 2.0645  | 0.7499  | 1.3417  | 7.4612  | 7.6559   | 4.21E-06 | 2.23E-04 | 4.5129  | Mus musculus creatine kinase, mitochondrial 2 (Ckmt2), nuclear gene encoding mitochondrial protein, mRNA.                      | 76722  | 13qC3   |
| SF3B3              | 1.0381  | 2.0535  | 0.7540  | 1.3222  | 9.1452  | 7.9136   | 2.96E-06 | 1.82E-04 | 4.8727  | Mus musculus splicing factor 3b, subunit 3 (Sf3b3), mRNA.                                                                      | 101943 | 8qE1    |
| D3UCLA1            | 1.0367  | 2.0515  | 0.7761  | 1.2973  | 10.2775 | 8.6169   | 1.18E-06 | 1.02E-04 | 5.8127  | Mus musculus DNA segment, Chr 3, University of California at Los Angeles 1 (D3Ucla1), mRNA.                                    | 28146  | 3qD     |
| VAC14              | 1.0342  | 2.0479  | 0.6715  | 1.3968  | 8.6590  | 6.1767   | 3.73E-05 | 1.15E-03 | 2.2740  | Mus musculus Vac14 homolog (S. cerevisiae) (Vac14), mRNA.                                                                      | 234729 | 8qE1    |
| KLF9               | 1.0248  | 2.0347  | 0.7201  | 1.3295  | 8.4776  | 7.2854   | 7.08E-06 | 3.30E-04 | 3.9801  | Mus musculus Kruppel-like factor 9 (Klf9), mRNA.                                                                               | 16601  | 19qB    |
| CCL9               | 1.0241  | 2.0337  | 0.5941  | 1.4542  | 6.1733  | 5.1580   | 2.00E-04 | 4.18E-03 | 0.5541  | Mus musculus chemokine (C-C motif) ligand 9 (Ccl9), mRNA.                                                                      | 20308  | 11qC    |
| LDHA               | 1.0217  | 2.0303  | 0.7632  | 1.2802  | 11.6451 | 8.5603   | 1.27E-06 | 1.03E-04 | 5.7392  | Mus musculus lactate dehydrogenase A (Ldha), mRNA.                                                                             | 16828  | 7qB4    |
| RNF222             | 1.0196  | 2.0273  | 0.7859  | 1.2532  | 5.9210  | 9.4521   | 4.23E-07 | 4.73E-05 | 6.8534  | Mus musculus ring finger protein 222 (Rnf222), mRNA.                                                                           | 320040 | 11qB3   |
| MTHFD2             | 1.0117  | 2.0163  | 0.5199  | 1.5035  | 7.2530  | 4.4561   | 6.87E-04 | 1.04E-02 | -0.7099 | Mus musculus methylenetetrahydrofolate dehydrogenase (NAD+ dependent), methenyltetrahydrofolate cyclohydrolase (Mthfd2), mRNA. | 17768  | 6qC3    |
| TEX9               | -1.0008 | -2.0011 | -1.2841 | -0.7174 | 8.0903  | -7.6493  | 4.25E-06 | 2.24E-04 | 4.5036  | Mus musculus testis expressed gene 9 (Tex9), mRNA.                                                                             | 21778  | 9qD     |
| SPRYD4             | -1.0056 | -2.0078 | -1.2881 | -0.7231 | 7.3718  | -7.7111  | 3.90E-06 | 2.17E-04 | 4.5907  | Mus musculus SPRY domain containing 4 (Spryd4), mRNA.                                                                          | 66701  | 10qD3   |
| MRPS26             | -1.0103 | -2.0144 | -1.3537 | -0.6670 | 9.6341  | -6.3737  | 2.75E-05 | 9.12E-04 | 2.5896  | Mus musculus mitochondrial ribosomal protein S26 (Mrps26), nuclear gene encoding mitochondrial protein, mRNA.                  | 99045  | 2qF1    |
| C030030A07RIK      | -1.0535 | -2.0755 | -1.2967 | -0.8103 | 9.0262  | -9.3812  | 4.60E-07 | 4.90E-05 | 6.7680  | Mus musculus RIKEN cDNA C030030A07 gene (C030030A07Rik), mRNA.                                                                 | 654818 | 6qG1    |
| RBM38              | -1.0574 | -2.0812 | -1.3452 | -0.7696 | 8.3239  | -7.9590  | 2.79E-06 | 1.76E-04 | 4.9353  | Mus musculus RNA binding motif protein 38 (Rbm38), mRNA.                                                                       | 56190  | 2qH3    |
| TMEM177            | -1.0584 | -2.0826 | -1.3589 | -0.7579 | 7.7882  | -7.6295  | 4.37E-06 | 2.28E-04 | 4.4755  | Mus musculus transmembrane protein 177 (Tmem177), mRNA.                                                                        | 66343  | 1qE2.3  |
| CYP7B1             | -1.0602 | -2.0852 | -1.3387 | -0.7817 | 7.8492  | -8.2458  | 1.90E-06 | 1.33E-04 | 5.3243  | Mus musculus cytochrome P450, family 7, subfamily b, polypeptide 1 (Cyp7b1), mRNA.                                             | 13123  | 3qA1    |
| NASP               | -1.0712 | -2.1011 | -1.3924 | -0.7499 | 7.5692  | -7.2216  | 7.76E-06 | 3.54E-04 | 3.8866  | Mus musculus nuclear autoantigenic sperm protein (histone-binding) (Nasp), transcript variant 2, mRNA.                         | 50927  | 4qD1    |
| ORAOV1             | -1.0730 | -2.1039 | -1.4003 | -0.7458 | 8.2491  | -7.1022  | 9.22E-06 | 4.01E-04 | 3.7100  | Mus musculus oral cancer overexpressed 1 (Oraov1), mRNA.                                                                       | 72284  | 7qF5    |
| OTTMUSG00000005065 | -1.0784 | -2.1116 | -1.3747 | -0.7820 | 9.0323  | -7.8813  | 3.09E-06 | 1.87E-04 | 4.8281  | Mus musculus predicted gene, OTTMUSG00000005065 (OTTMUSG00000005065), mRNA.                                                    | 327860 | 11qA1   |
| ZFP365             | -1.0787 | -2.1121 | -1.4029 | -0.7545 | 9.7490  | -7.2076  | 7.92E-06 | 3.59E-04 | 3.8660  | Mus musculus zinc finger protein 365 (Zfp365), mRNA.                                                                           | 216049 | 10qB5.1 |
| MDK                | -1.0905 | -2.1295 | -1.3691 | -0.8119 | 8.4523  | -8.4781  | 1.41E-06 | 1.11E-04 | 5.6320  | Mus musculus midkine (Mdk), transcript variant 2, mRNA.                                                                        | 17242  | 2qE1    |
| ANKRD46            | -1.1062 | -2.1528 | -1.4903 | -0.7220 | 6.5946  | -6.2372  | 3.40E-05 | 1.08E-03 | 2.3715  | Mus musculus ankyrin repeat domain 46 (Ankrd46), mRNA.                                                                         | 68839  | 15qB3.1 |
| GADD45B            | -1.1226 | -2.1775 | -1.3600 | -0.8853 | 10.3821 | -10.2449 | 1.70E-07 | 2.60E-05 | 7.7720  | Mus musculus growth arrest and DNA-damage-inducible 45 beta (Gadd45b), mRNA.                                                   | 17873  | 10qC1   |
| HBA-A1             | -1.1410 | -2.2053 | -1.4343 | -0.5442 | 11.0077 | -4.1410  | 1.22E-03 | 1.62E-02 | -1.2944 | Mus musculus hemoglobin alpha, adult chain 1 (Hba-a1), mRNA.                                                                   | 15122  | 11qA4   |
| MXD1               | -1.1477 | -2.2156 | -1.5200 | -0.7754 | 6.3366  | -6.6774  | 1.73E-05 | 6.44E-04 | 3.0657  | Mus musculus MAX dimerization protein 1 (Mxd1), mRNA.                                                                          | 17119  | 6qD1    |
| 732482             | -1.1491 | -2.2177 | -1.4101 | -0.8880 | 7.9028  | -9.5353  | 3.83E-07 | 4.45E-05 | 6.9528  | Mus musculus predicted gene, 732482 (732482), non-coding RNA.                                                                  | 732482 | 8qA2    |
| MTNR1A             | -1.1509 | -2.2206 | -1.4164 | -0.8855 | 6.1658  | -9.3915  | 4.54E-07 | 4.90E-05 | 6.7805  | Mus musculus melatonin receptor 1A (Mtnr1a), mRNA.                                                                             | 17773  | 8qB1.1  |
| PPP2R5E            | -1.1523 | -2.2227 | -1.4394 | -0.8652 | 8.9135  | -8.6942  | 1.07E-06 | 9.52E-05 | 5.9123  | Mus musculus protein phosphatase 2, regulatory subunit B (B56), epsilon isoform (Ppp2r5e), mRNA.                               | 26932  | 12qC3   |
| SESN1              | -1.1548 | -2.2266 | -1.4556 | -0.8541 | 7.6849  | -8.3167  | 1.73E-06 | 1.27E-04 | 5.4190  | Mus musculus sestrin 1 (Sesn1), mRNA.                                                                                          | 140742 | 10qB2   |
| SORBS1             | -1.1634 | -2.2398 | -1.4909 | -0.8358 | 7.8965  | -7.6930  | 4.00E-06 | 2.17E-04 | 4.5651  | Mus musculus sorbin and SH3 domain containing 1 (Sorbs1), transcript variant 3, mRNA.                                          | 20411  | 19qC3   |
| EDNRB              | -1.1900 | -2.2816 | -1.4928 | -0.8872 | 8.6041  | -8.5126  | 1.35E-06 | 1.08E-04 | 5.6772  | Mus musculus endothelin receptor type B (Ednrb), mRNA.                                                                         | 13618  | 14qE2.3 |
| PELL1              | -1.1958 | -2.2908 | -1.5140 | -0.8776 | 7.5108  | -8.1401  | 2.19E-06 | 1.47E-04 | 5.1821  | Mus musculus pellino 1 (Peli1), mRNA.                                                                                          | 67245  | 11qA3.1 |
| CHFR               | -1.2035 | -2.3030 | -1.3999 | -1.0071 | 7.4683  | -13.2706 | 8.32E-09 | 2.94E-06 | 10.7598 | Mus musculus checkpoint with forkhead and ring finger domains (Chfr), mRNA.                                                    | 231600 | 5qF     |
| MYD116             | -1.2066 | -2.3079 | -1.4843 | -0.9289 | 9.4542  | -9.4105  | 4.44E-07 | 4.85E-05 | 6.8034  | Mus musculus myeloid differentiation primary response gene 116 (Myd116), mRNA.                                                 | 17872  | 7qB4    |
| TRIM26             | -1.2093 | -2.3122 | -1.4873 | -0.9313 | 9.2529  | -9.4209  | 4.39E-07 | 4.85E-05 | 6.8160  | Mus musculus tripartite motif-containing 26 (Trim26), transcript variant 1, mRNA.                                              | 22670  | 17qB1   |
| E330034G19RIK      | -1.2159 | -2.3229 | -1.5597 | -0.8721 | 9.2249  | -7.6600  | 4.19E-06 | 2.23E-04 | 4.5187  | Mus musculus RIKEN cDNA E330034G19 gene (E330034G19Rik), mRNA.                                                                 | 105418 | 14qA3   |
| PPP1R3C            | -1.2270 | -2.3407 | -1.5126 | -0.9414 | 9.2598  | -9.3049  | 5.04E-07 | 5.25E-05 | 6.6757  | Mus musculus protein phosphatase 1, regulatory (inhibitor) subunit 3C (Ppp1r3c), mRNA.                                         | 53412  | 19qC2   |
| 1810009O10RIK      | -1.2277 | -2.3419 | -1.5153 | -0.9400 | 8.8451  | -9.2446  | 5.42E-07 | 5.58E-05 | 6.6022  | Mus musculus RIKEN cDNA 1810009O10 gene (1810009O10Rik), mRNA.                                                                 | 69109  | 11qB5   |
| HN1L               | -1.2303 | -2.3461 | -1.5516 | -0.9089 | 8.7502  | -8.2917  | 1.79E-06 | 1.29E-04 | 5.3856  | Mus musculus hematological and neurological expressed 1-like (Hn1l), mRNA.                                                     | 52009  | 17qA3.3 |
| ANO4               | -1.2374 | -2.3577 | -1.5130 | -0.9617 | 6.3349  | -9.7235  | 3.07E-07 | 3.92E-05 | 7.1752  | Mus musculus anoctamin 4 (Ano4), mRNA.                                                                                         | 320091 | 10qC1   |
| CCKBR              | -1.2522 | -2.3821 | -1.5061 | -0.9983 | 9.1480  | -10.6822 | 1.05E-07 | 1.76E-05 | 8.2520  | Mus musculus cholecystokinin B receptor (Cckbr), mRNA.                                                                         | 12426  | 7qE3    |
| INTS3              | -1.2647 | -2.4029 | -1.5534 | -0.9761 | 8.7978  | -9.4898  | 4.04E-07 | 4.58E-05 | 6.8986  | Mus musculus integrator complex subunit 3 (Ints3), transcript variant 1, mRNA.                                                 | 229543 | 3qF1    |
| UBR5               | -1.2764 | -2.4223 | -1.5077 | -1.0450 | 9.7484  | -11.9491 | 2.87E-08 | 7.62E-06 | 9.5461  | Mus musculus ubiquitin protein ligase E3 component n-recognin 5 (Ubr5), mRNA.                                                  | 70790  | 15qB3.1 |
| SLC46A3            | -1.2802 | -2.4287 | -1.6238 | -0.9365 | 10.1475 | -8.0691  | 2.40E-06 | 1.56E-04 | 5.0859  | Mus musculus solute carrier family 46, member 3 (Slc46a3), mRNA.                                                               | 71706  | 5qG3    |

Supplemental Table 3

|               |         |          |         |         |         |          |          |          |         |                                                                                                                            |        |           |
|---------------|---------|----------|---------|---------|---------|----------|----------|----------|---------|----------------------------------------------------------------------------------------------------------------------------|--------|-----------|
| SKAP2         | -1.3007 | -2.4636  | -1.7525 | -0.8490 | 9.1192  | -6.2367  | 3.40E-05 | 1.08E-03 | 2.3707  | Mus musculus src family associated phosphoprotein 2 (Skap2), mRNA.                                                         | 54353  | 6qB3      |
| BCDO2         | -1.3394 | -2.5305  | -1.6105 | -1.0683 | 6.6189  | -10.7020 | 1.03E-07 | 1.76E-05 | 8.2733  | Mus musculus beta-carotene 9', 10'-dioxygenase 2 (Bcdo2), mRNA.                                                            | 170752 | 9qA5.3    |
| FAS           | -1.3633 | -2.5727  | -1.6344 | -1.0921 | 6.8104  | -10.8905 | 8.44E-08 | 1.61E-05 | 8.4744  | Mus musculus Fas (TNF receptor superfamily member 6) (Fas), mRNA.                                                          | 14102  | 19qC1     |
| 2310021H06RIK | -1.3698 | -2.5844  | -1.6476 | -1.0920 | 6.5562  | -10.6799 | 1.06E-07 | 1.76E-05 | 8.2495  | Mus musculus RIKEN cDNA 2310021H06 gene (2310021H06Rik), mRNA.                                                             | 67135  | 2qH1      |
| GSC           | -1.3822 | -2.6067  | -1.6551 | -1.1094 | 6.1705  | -10.9733 | 7.73E-08 | 1.57E-05 | 8.5618  | Mus musculus goosecoid homeobox (Gsc), mRNA.                                                                               | 14836  | 12qE      |
| PBLD          | -1.3866 | -2.6147  | -1.7362 | -1.0370 | 6.8146  | -8.5908  | 1.22E-06 | 1.03E-04 | 5.7789  | Mus musculus phenazine biosynthesis-like protein domain containing (Pbld), mRNA.                                           | 68371  | 10qB4     |
| DBF4          | -1.3881 | -2.6173  | -1.7520 | -1.0241 | 6.7778  | -8.2617  | 1.86E-06 | 1.31E-04 | 5.3455  | Mus musculus DBF4 homolog (S. cerevisiae) (Dbf4), mRNA.                                                                    | 27214  | 5qA1      |
| CCDC53        | -1.3988 | -2.6368  | -1.6038 | -1.1938 | 10.1163 | -14.7776 | 2.30E-09 | 1.01E-06 | 11.9988 | Mus musculus coiled-coil domain containing 53 (Ccdc53), mRNA.                                                              | 67282  | 10qC1     |
| SUSD3         | -1.4103 | -2.6580  | -1.7664 | -1.0543 | 6.2378  | -8.5796  | 1.24E-06 | 1.03E-04 | 5.7644  | Mus musculus sushi domain containing 3 (Susd3), mRNA.                                                                      | 66329  | 13qA5     |
| 1500012F01RIK | -1.4150 | -2.6666  | -1.7817 | -1.0483 | 9.6214  | -8.3576  | 1.64E-06 | 1.23E-04 | 5.4732  | Mus musculus RIKEN cDNA 1500012F01 gene (1500012F01Rik), mRNA.                                                             | 68949  | 2qH3      |
| FRMD6         | -1.4158 | -2.6681  | -1.6823 | -1.1493 | 7.6058  | -11.5080 | 4.45E-08 | 1.05E-05 | 9.1110  | Mus musculus FERM domain containing 6 (Frmd6), mRNA.                                                                       | 319710 | 12qC2-qC3 |
| STAMBPL1      | -1.4176 | -2.6714  | -1.7736 | -1.0615 | 8.9992  | -8.6235  | 1.17E-06 | 1.02E-04 | 5.8212  | Mus musculus Stam binding protein like 1 (Stambpl1), mRNA.                                                                 | 76630  | 19qC1     |
| PLEKHA4       | -1.4632 | -2.7573  | -1.7043 | -1.2221 | 6.1563  | -13.1448 | 9.32E-09 | 3.16E-06 | 10.6497 | Mus musculus pleckstrin homology domain containing, family A (phosphoinositide binding specific) member 4 (Plekha4), mRNA. | 69217  | 7qB4      |
| H2-EB1        | -1.4686 | -2.7675  | -1.9279 | -1.0093 | 7.6470  | -6.9261  | 1.19E-05 | 4.77E-04 | 3.4459  | Mus musculus histocompatibility 2, class II antigen E beta (H2-Eb1), mRNA.                                                 | 14969  | 17qB1     |
| SFRS14        | -1.4735 | -2.7769  | -1.7697 | -1.1773 | 9.0454  | -10.7751 | 9.54E-08 | 1.75E-05 | 8.3517  | Mus musculus splicing factor, arginine/serine-rich 14 (Sfrs14), mRNA.                                                      | 234373 | 8qB3.3    |
| PAX4          | -1.5010 | -2.8303  | -1.8162 | -1.1858 | 6.2925  | -10.3139 | 1.58E-07 | 2.45E-05 | 7.8489  | Mus musculus paired box gene 4 (Pax4), mRNA.                                                                               | 18506  | 6qA3.3    |
| SCNN1B        | -1.5137 | -2.8555  | -1.8390 | -1.1885 | 7.5718  | -10.0801 | 2.05E-07 | 2.91E-05 | 7.5863  | Mus musculus sodium channel, nonvoltage-gated 1 beta (Scnn1b), mRNA.                                                       | 20277  | 7qF2      |
| PPM1E         | -1.5775 | -2.9845  | -1.8877 | -1.2672 | 6.9521  | -11.0122 | 7.42E-08 | 1.55E-05 | 8.6025  | Mus musculus protein phosphatase 1E (PP2C domain containing) (Ppm1e), mRNA.                                                | 320472 | 11qC      |
| LENEP         | -1.5835 | -2.9970  | -1.9885 | -1.1785 | 8.5881  | -8.4681  | 1.43E-06 | 1.12E-04 | 5.6188  | Mus musculus lens epithelial protein (Lenep), mRNA.                                                                        | NA     |           |
| USP45         | -1.6638 | -3.1686  | -1.9325 | -1.3952 | 6.3068  | -13.4142 | 7.32E-09 | 2.80E-06 | 10.8842 | Mus musculus ubiquitin specific petidase 45 (Usp45), mRNA. XM_920449 XM_920458                                             | 77593  | 4qA3      |
| RAB32         | -1.6736 | -3.1901  | -1.9741 | -1.3732 | 7.2167  | -12.0652 | 2.56E-08 | 7.12E-06 | 9.6580  | Mus musculus RAB32, member RAS oncogene family (Rab32), mRNA.                                                              | 67844  | 10qA1     |
| 6330503C03RIK | -1.6838 | -3.2128  | -2.0638 | -1.3039 | 7.9895  | -9.5986  | 3.56E-07 | 4.35E-05 | 7.0280  | Mus musculus RIKEN cDNA 6330503C03 gene (6330503C03Rik), mRNA.                                                             | 76156  | 6qB2.1    |
| OXT           | -1.7209 | -3.2963  | -2.1691 | -1.2726 | 7.6068  | -8.3161  | 1.74E-06 | 1.27E-04 | 5.4181  | Mus musculus oxytocin (Oxt), mRNA.                                                                                         | 18429  | 2qF1      |
| SLC6A13       | -1.7281 | -3.3128  | -2.4592 | -0.9969 | 7.1987  | -5.1193  | 2.13E-04 | 4.39E-03 | 0.4859  | Mus musculus solute carrier family 6 (neurotransmitter transporter, GABA), member 13 (Slc6a13), mRNA.                      | 14412  | 6qF1      |
| 1700021K19RIK | -1.7817 | -3.4383  | -2.0406 | -1.5228 | 7.9937  | -14.9046 | 2.07E-09 | 1.00E-06 | 12.0970 | Mus musculus RIKEN cDNA 1700021K19 gene (1700021K19Rik), mRNA.                                                             | 224118 | 16qB3     |
| SLC13A4       | -1.8382 | -3.5756  | -2.7997 | -0.8767 | 8.1811  | -4.1409  | 1.22E-03 | 1.62E-02 | -1.2946 | Mus musculus solute carrier family 13 (sodium/sulfate symporters), member 4 (Slc13a4), mRNA.                               | 243755 | 6qB1      |
| TRAFD1        | -1.8750 | -3.6681  | -2.2796 | -1.4705 | 9.1719  | -10.0391 | 2.14E-07 | 2.98E-05 | 7.5397  | Mus musculus TRAF type zinc finger domain containing 1 (Trafd1), mRNA.                                                     | 231712 | 5qF       |
| DGAT2         | -1.8892 | -3.7044  | -2.1964 | -1.5821 | 7.7230  | -13.3218 | 7.95E-09 | 2.92E-06 | 10.8043 | Mus musculus diacylglycerol O-acyltransferase 2 (Dgat2), mRNA.                                                             | 67800  | 7qE2      |
| IGF2          | -1.9230 | -3.7920  | -2.6416 | -1.2044 | 10.6363 | -5.7963  | 6.86E-05 | 1.87E-03 | 1.6486  | Mus musculus insulin-like growth factor 2 (Igf2), mRNA.                                                                    | 16002  | 7qF5      |
| GADD45G       | -1.9941 | -3.9838  | -2.2780 | -1.7103 | 9.9701  | -15.2146 | 1.62E-09 | 9.09E-07 | 12.3325 | Mus musculus growth arrest and DNA-damage-inducible 45 gamma (Gadd45g), mRNA.                                              | 23882  | 13qA5     |
| SNX22         | -2.0256 | -4.0715  | -2.4841 | -1.5670 | 9.3734  | -9.5675  | 3.69E-07 | 4.39E-05 | 6.9912  | Mus musculus sorting nexin 22 (Snx22), mRNA.                                                                               | 382083 | 9qC       |
| TCP11         | -2.1301 | -4.3774  | -2.6965 | -1.5636 | 9.0544  | -8.1447  | 2.17E-06 | 1.47E-04 | 5.1884  | Mus musculus t-complex protein 11 (Tcp11), mRNA.                                                                           | 21463  | 17qA3.3   |
| GJB6          | -2.1346 | -4.3910  | -2.5877 | -1.6815 | 5.9756  | -10.2040 | 1.78E-07 | 2.68E-05 | 7.7262  | Mus musculus gap junction protein, beta 6 (Gjb6), transcript variant 2, mRNA.                                              | 14623  | 14qC3     |
| KLHL22        | -2.4230 | -5.3628  | -2.7074 | -2.1386 | 8.0373  | -18.4513 | 1.55E-10 | 1.42E-07 | 14.5037 | Mus musculus kelch-like 22 (Drosophila) (Klhl22), mRNA.                                                                    | 224023 | 16qA3     |
| HMOX1         | -2.4233 | -5.3640  | -3.0423 | -1.8043 | 11.7014 | -8.4798  | 1.40E-06 | 1.11E-04 | 5.6342  | Mus musculus heme oxygenase (decycling) 1 (Hmox1), mRNA.                                                                   | 15368  | 8qC1      |
| RSAD2         | -2.4449 | -5.4447  | -2.9281 | -1.9616 | 7.9109  | -10.9576 | 7.86E-08 | 1.57E-05 | 8.5452  | Mus musculus radical S-adenosyl methionine domain containing 2 (Rsad2), mRNA.                                              | 58185  | 12qA2     |
| TREX1         | -2.5871 | -6.0090  | -3.1708 | -2.0034 | 9.7744  | -9.6002  | 3.55E-07 | 4.35E-05 | 7.0300  | Mus musculus three prime repair exonuclease 1 (Trex1), transcript variant 2, mRNA.                                         | 22040  | 9qF2      |
| 1190002N15RIK | -2.6266 | -6.1757  | -3.2726 | -1.9806 | 8.4727  | -8.8070  | 9.27E-07 | 8.42E-05 | 6.0565  | Mus musculus RIKEN cDNA 1190002N15 gene (1190002N15Rik), mRNA.                                                             | 68861  | 9qE3.3    |
| RGS4          | -3.0628 | -8.3560  | -3.3850 | -2.7406 | 8.2222  | -20.5902 | 4.02E-11 | 4.61E-08 | 15.6971 | Mus musculus regulator of G-protein signaling 4 (Rgs4), mRNA.                                                              | 19736  | 1qH3      |
| HSPB1         | -3.7833 | -13.7687 | -5.2072 | -2.3594 | 11.0213 | -5.7550  | 7.34E-05 | 1.96E-03 | 1.5796  | Mus musculus heat shock protein 1 (Hspb1), mRNA.                                                                           | 15507  | 5qG2      |

Supplemental Table 4

| ILMN_Gene     | log2FC<br>(Het vs<br>WT) | Fold Change<br>(Het vs WT) | CI.L    | CI.R    | AveExpr | t       | P.Value  | adj.P.Val | B           | DEFINITION                                                                                                                  | ENTREZ_GENE_<br>ID | CYTOBAND |
|---------------|--------------------------|----------------------------|---------|---------|---------|---------|----------|-----------|-------------|-----------------------------------------------------------------------------------------------------------------------------|--------------------|----------|
| ARG1          | 3.4152                   | 10.6682                    | 2.4406  | 4.3899  | 6.3901  | 7.5124  | 2.75E-06 | 1.48E-03  | 4.952656728 | Mus musculus arginase 1, liver (Arg1), mRNA.                                                                                | 11846              | 10qA4    |
| RETNLA        | 2.8281                   | 7.1014                     | 2.1440  | 3.5122  | 6.6829  | 8.8632  | 3.93E-07 | 3.63E-04  | 6.71119699  | Mus musculus resistin like alpha (Retnla), mRNA.                                                                            | 57262              | 16qB5    |
| IL4           | 2.7753                   | 6.8463                     | 2.4617  | 3.0889  | 8.6068  | 18.9735 | 2.03E-11 | 1.97E-07  | 14.21227704 | Mus musculus interleukin 4 (Il4), mRNA.                                                                                     | 16189              | 11qB1.3  |
| PLK3          | 2.2894                   | 4.8885                     | 1.9662  | 2.6125  | 8.3382  | 15.1879 | 4.04E-10 | 1.96E-06  | 12.25439988 | Mus musculus polo-like kinase 3 (Plk3), mRNA                                                                                | NA                 |          |
| TNFRSF12A     | 2.1252                   | 4.3627                     | 1.4727  | 2.7777  | 8.1059  | 6.9822  | 6.26E-06 | 2.77E-03  | 4.189179512 | Mus musculus tumor necrosis factor receptor superfamily, member 12a (Tnfrsf12a), mRNA.                                      | 27279              | 17qA3.3  |
| FOS           | 2.0562                   | 4.1588                     | 1.1789  | 2.9335  | 6.3049  | 5.0246  | 1.83E-04 | 2.44E-02  | 0.992403885 | Mus musculus FBJ osteosarcoma oncogene (Fos), mRNA.                                                                         | 14281              | 12qD2    |
| COX6A2        | 2.0075                   | 4.0210                     | 1.6705  | 2.3446  | 9.7204  | 12.7698 | 3.97E-09 | 9.64E-06  | 10.5573367  | Mus musculus cytochrome c oxidase, subunit VI a, polypeptide 2 (Cox6a2), nuclear gene encoding mitochondrial protein, mRNA. | 12862              | 7qF3     |
| TNFAIP8       | 1.8948                   | 3.7186                     | 1.6135  | 2.1760  | 8.6240  | 14.4420 | 7.89E-10 | 2.55E-06  | 11.7749161  | Mus musculus tumor necrosis factor, alpha-induced protein 8 (Tnfaip8), mRNA.                                                | 106869             | 18qD1    |
| EAR11         | 1.8505                   | 3.6062                     | 1.1876  | 2.5133  | 5.9809  | 5.9850  | 3.27E-05 | 9.36E-03  | 2.634747548 | Mus musculus eosinophil-associated, ribonuclease A family, member 11 (Ear11), mRNA.                                         | 93726              | 14qC1    |
| CCL7          | 1.6071                   | 3.0464                     | 1.2020  | 2.0122  | 6.1551  | 8.5054  | 6.44E-07 | 5.21E-04  | 6.270270428 | Mus musculus chemokine (C-C motif) ligand 7 (Ccl7), mRNA.                                                                   | 20306              | 11qC     |
| ATF3          | 1.5376                   | 2.9031                     | 0.9015  | 2.1737  | 6.1201  | 5.1823  | 1.37E-04 | 2.09E-02  | 1.27144958  | Mus musculus activating transcription factor 3 (Atf3), mRNA.                                                                | 11910              | 1qH6     |
| SQSTM1        | 1.3751                   | 2.5938                     | 1.0412  | 1.7089  | 10.9061 | 8.8293  | 4.12E-07 | 3.63E-04  | 6.670199137 | Mus musculus sequestosome 1 (Sqstm1), mRNA.                                                                                 | 18412              | 11qB1.3  |
| OLFM1         | 1.2554                   | 2.3873                     | 0.9608  | 1.5500  | 8.0529  | 9.1345  | 2.73E-07 | 2.94E-04  | 7.034121708 | Mus musculus olfactomedin 1 (Olfm1), transcript variant 1, mRNA. XM_923993 XM_923996 XM_924001                              | 56177              | 2qA3     |
| TSPAN10       | 1.2550                   | 2.3867                     | 1.0220  | 1.4881  | 7.4148  | 11.5457 | 1.46E-08 | 2.83E-05  | 9.52104388  | Mus musculus tetraspanin 10 (Tspan10), mRNA.                                                                                | 208634             | 11qE2    |
| PAQR7         | 1.2301                   | 2.3458                     | 0.9696  | 1.4906  | 9.1017  | 10.1241 | 7.68E-08 | 1.07E-04  | 8.134153257 | Mus musculus progesterone and adipoQ receptor family member VII (Paqr7), mRNA.                                              | 71904              | 4qD3     |
| HYAL1         | 1.1625                   | 2.2384                     | 0.6484  | 1.6765  | 8.4138  | 4.8481  | 2.55E-04 | 2.78E-02  | 0.676352954 | Mus musculus hyaluronoglucosaminidase 1 (Hyal1), mRNA.                                                                      | 15586              | 9qF1     |
| RASGRP1       | 1.1233                   | 2.1784                     | 0.7986  | 1.4479  | 6.4852  | 7.4181  | 3.17E-06 | 1.56E-03  | 4.820015713 | Mus musculus RAS guanyl releasing protein 1 (Rasgrp1), mRNA.                                                                | 19419              | 2qE5     |
| TFRC          | 1.0937                   | 2.1342                     | 0.8016  | 1.3859  | 8.6606  | 8.0259  | 1.28E-06 | 8.58E-04  | 5.651793337 | Mus musculus transferrin receptor (Tfrc), mRNA.                                                                             | 22042              | 16qB3    |
| KLF9          | 1.0841                   | 2.1201                     | 0.6482  | 1.5200  | 7.7912  | 5.3319  | 1.04E-04 | 1.77E-02  | 1.532828503 | Mus musculus Kruppel-like factor 9 (Klf9), mRNA.                                                                            | 16601              | 19qB     |
| CHST7         | 1.0789                   | 2.1125                     | 0.6975  | 1.4604  | 6.6128  | 6.0636  | 2.86E-05 | 8.94E-03  | 2.762955183 | Mus musculus carbohydrate (N-acetylglucosamino) sulfotransferase 7 (Chst7), mRNA.                                           | 60322              | XqA1.3   |
| FAM115C       | 1.0539                   | 2.0761                     | 0.8459  | 1.2619  | 6.5474  | 10.8624 | 3.17E-08 | 5.13E-05  | 8.880943894 | Mus musculus family with sequence similarity 115, member C (Fam115c), mRNA.                                                 | 232748             | 6qB2.1   |
| PROK2         | 1.0262                   | 2.0367                     | 0.5782  | 1.4743  | 6.4670  | 4.9106  | 2.27E-04 | 2.66E-02  | 0.788794386 | Mus musculus prokineticin 2 (Prok2), transcript variant 1, mRNA.                                                            | 50501              | 6qD3     |
| LOC100046232  | 1.0176                   | 2.0246                     | 0.5526  | 1.4826  | 8.2279  | 4.6919  | 3.42E-04 | 3.54E-02  | 0.393081147 | PREDICTED: Mus musculus similar to NFIL3/E4BP4 transcription factor (LOC100046232), mRNA (NB: Withdrawn by NCBI).           | 100046232          |          |
| LGALS3        | 1.0159                   | 2.0222                     | 0.6202  | 1.4117  | 9.0185  | 5.5037  | 7.64E-05 | 1.43E-02  | 1.828899616 | Mus musculus lectin, galactose binding, soluble 3 (Lgals3), mRNA.                                                           | 16854              | 14qC1    |
| C1QA          | 1.0058                   | 2.0081                     | 0.5344  | 1.4772  | 6.2390  | 4.5741  | 4.28E-04 | 4.24E-02  | 0.177780297 | Mus musculus complement component 1, q subcomponent, alpha polypeptide (C1qa), mRNA.                                        | 12259              | 4qD3     |
| 4921528I01RIK | -1.0844                  | -2.1206                    | -1.5498 | -0.6190 | 6.9205  | -4.9954 | 1.93E-04 | 2.54E-02  | 0.94048029  | Mus musculus RIKEN cDNA 4921528I01 gene (4921528I01Rik), mRNA.                                                              | 70950              | 18qA2    |
| DDX3Y         | -1.2524                  | -2.3824                    | -1.7751 | -0.7296 | 6.6299  | -5.1361 | 1.49E-04 | 2.16E-02  | 1.189985213 | Mus musculus DEAD (Asp-Glu-Ala-Asp) box polypeptide 3, Y-linked (Ddx3y), mRNA.                                              | 26900              | YqA1     |
| TREX1         | -1.3560                  | -2.5597                    | -1.7483 | -0.9637 | 9.0890  | -7.4105 | 3.21E-06 | 1.56E-03  | 4.809167734 | Mus musculus three prime repair exonuclease 1 (Trex1), transcript variant 2, mRNA.                                          | 22040              | 9qF2     |
| GJB6          | -1.3822                  | -2.6066                    | -1.7554 | -1.0090 | 5.8098  | -7.9407 | 1.45E-06 | 8.79E-04  | 5.538415841 | Mus musculus gap junction protein, beta 6 (Gjb6), transcript variant 2, mRNA.                                               | 14623              | 14qC3    |
| GADD45G       | -1.4770                  | -2.7836                    | -2.0285 | -0.9254 | 10.2744 | -5.7413 | 5.01E-05 | 1.20E-02  | 2.231276335 | Mus musculus growth arrest and DNA-damage-inducible 45 gamma (Gadd45g), mRNA.                                               | 23882              | 13qA5    |
| 1190002N15RIK | -1.8510                  | -3.6074                    | -2.3271 | -1.3748 | 8.3065  | -8.3332 | 8.21E-07 | 6.14E-04  | 6.05187757  | Mus musculus RIKEN cDNA 1190002N15 gene (1190002N15Rik), mRNA.                                                              | 68861              | 9qE3.3   |
| HMOX1         | -2.0259                  | -4.0726                    | -2.5957 | -1.4562 | 11.1805 | -7.6234 | 2.32E-06 | 1.33E-03  | 5.106994897 | Mus musculus heme oxygenase (decycling) 1 (Hmox1), mRNA.                                                                    | 15368              | 8qC1     |
| HSPB1         | -2.4508                  | -5.4672                    | -3.0059 | -1.8958 | 8.9774  | -9.4659 | 1.76E-07 | 2.14E-04  | 7.415916082 | Mus musculus heat shock protein 1 (Hspb1), mRNA.                                                                            | 15507              | 5qG2     |

Supplemental Table 5

| KEGG_ID                                               | greater.p.geo | greater.st | greater.p. | greater.q. | greater.se | greater.ex | less.p.geo | less.stat. |            |            | less.set.siz | stats.stat. |          |            |
|-------------------------------------------------------|---------------|------------|------------|------------|------------|------------|------------|------------|------------|------------|--------------|-------------|----------|------------|
|                                                       | mean          | at.mean    | val        | val        | t.size     | p1         | mean       | mean       | less.p.val | less.q.val | e            | less.exp1   | mean     | stats.exp1 |
| mmu04142 Lysosome                                     | 0.000265601   | 3.533608   | 0.000266   | 0.043293   | 84         | 0.000266   | 0.999734   | 3.533608   | 0.999734   | 0.999734   | 84           | 0.999734    | 3.533608 | 3.533608   |
| mmu04610 Complement and coagulation cascades          | 0.006199425   | 2.626298   | 0.006199   | 0.368759   | 24         | 0.006199   | 0.993801   | 2.626298   | 0.993801   | 0.999734   | 24           | 0.993801    | 2.626298 | 2.626298   |
| mmu00010 Glycolysis / Gluconeogenesis                 | 0.007428368   | 2.518847   | 0.007428   | 0.368759   | 29         | 0.007428   | 0.992572   | 2.518847   | 0.992572   | 0.999734   | 29           | 0.992572    | 2.518847 | 2.518847   |
| mmu04380 Osteoclast differentiation                   | 0.009556264   | 2.382646   | 0.009556   | 0.368759   | 62         | 0.009556   | 0.990444   | 2.382646   | 0.990444   | 0.999734   | 62           | 0.990444    | 2.382646 | 2.382646   |
| mmu04060 Cytokine-cytokine receptor interaction       | 0.011311612   | 2.314864   | 0.011312   | 0.368759   | 76         | 0.011312   | 0.988688   | 2.314864   | 0.988688   | 0.999734   | 76           | 0.988688    | 2.314864 | 2.314864   |
| mmu00531 Glycosaminoglycan degradation                | 0.016749761   | 2.262588   | 0.01675    | 0.424087   | 14         | 0.01675    | 0.98325    | 2.262588   | 0.98325    | 0.999734   | 14           | 0.98325     | 2.262588 | 2.262588   |
| mmu01040 Biosynthesis of unsaturated fatty acids      | 0.018212333   | 2.199988   | 0.018212   | 0.424087   | 15         | 0.018212   | 0.981788   | 2.199988   | 0.981788   | 0.999734   | 15           | 0.981788    | 2.199988 | 2.199988   |
| mmu00600 Sphingolipid metabolism                      | 0.022085489   | 2.080135   | 0.022085   | 0.449992   | 21         | 0.022085   | 0.977915   | 2.080135   | 0.977915   | 0.999734   | 21           | 0.977915    | 2.080135 | 2.080135   |
| mmu00520 Amino sugar and nucleotide sugar metabolism  | 0.035672244   | 1.83917    | 0.035672   | 0.589158   | 29         | 0.035672   | 0.964328   | 1.83917    | 0.964328   | 0.999734   | 29           | 0.964328    | 1.83917  | 1.83917    |
| mmu04915 Estrogen signaling pathway                   | 0.036275485   | 1.820498   | 0.036275   | 0.589158   | 47         | 0.036275   | 0.963725   | 1.820498   | 0.963725   | 0.999734   | 47           | 0.963725    | 1.820498 | 1.820498   |
| mmu04721 Synaptic vesicle cycle                       | 0.04900835    | 1.67868    | 0.049008   | 0.589158   | 36         | 0.049008   | 0.950992   | 1.67868    | 0.950992   | 0.999734   | 36           | 0.950992    | 1.67868  | 1.67868    |
| mmu04062 Chemokine signaling pathway                  | 0.050116611   | 1.656004   | 0.050117   | 0.589158   | 71         | 0.050117   | 0.949883   | 1.656004   | 0.949883   | 0.999734   | 71           | 0.949883    | 1.656004 | 1.656004   |
| mmu04670 Leukocyte transendothelial migration         | 0.051970746   | 1.639374   | 0.051971   | 0.589158   | 57         | 0.051971   | 0.948029   | 1.639374   | 0.948029   | 0.999734   | 57           | 0.948029    | 1.639374 | 1.639374   |
| mmu00052 Galactose metabolism                         | 0.054737382   | 1.652539   | 0.054737   | 0.589158   | 16         | 0.054737   | 0.945263   | 1.652539   | 0.945263   | 0.999734   | 16           | 0.945263    | 1.652539 | 1.652539   |
| mmu04668 TNF signaling pathway                        | 0.058339408   | 1.586541   | 0.058339   | 0.589158   | 49         | 0.058339   | 0.941661   | 1.586541   | 0.941661   | 0.999734   | 49           | 0.941661    | 1.586541 | 1.586541   |
| mmu00511 Other glycan degradation                     | 0.060518646   | 1.644827   | 0.060519   | 0.589158   | 11         | 0.060519   | 0.939481   | 1.644827   | 0.939481   | 0.999734   | 11           | 0.939481    | 1.644827 | 1.644827   |
| mmu00330 Arginine and proline metabolism              | 0.061445942   | 1.592204   | 0.061446   | 0.589158   | 24         | 0.061446   | 0.938554   | 1.592204   | 0.938554   | 0.999734   | 24           | 0.938554    | 1.592204 | 1.592204   |
| mmu04660 T cell receptor signaling pathway            | 0.069319822   | 1.498065   | 0.06932    | 0.627729   | 53         | 0.06932    | 0.93068    | 1.498065   | 0.93068    | 0.999734   | 53           | 0.93068     | 1.498065 | 1.498065   |
| mmu00350 Tyrosine metabolism                          | 0.080747409   | 1.444036   | 0.080747   | 0.679239   | 14         | 0.080747   | 0.919253   | 1.444036   | 0.919253   | 0.999734   | 14           | 0.919253    | 1.444036 | 1.444036   |
| mmu04621 NOD-like receptor signaling pathway          | 0.089585159   | 1.370261   | 0.089585   | 0.679239   | 19         | 0.089585   | 0.910415   | 1.370261   | 0.910415   | 0.999734   | 19           | 0.910415    | 1.370261 | 1.370261   |
| mmu00062 Fatty acid elongation                        | 0.09257174    | 1.365124   | 0.092572   | 0.679239   | 13         | 0.092572   | 0.907428   | 1.365124   | 0.907428   | 0.999734   | 13           | 0.907428    | 1.365124 | 1.365124   |
| mmu04662 B cell receptor signaling pathway            | 0.100514244   | 1.294033   | 0.100514   | 0.679239   | 36         | 0.100514   | 0.899486   | 1.294033   | 0.899486   | 0.999734   | 36           | 0.899486    | 1.294033 | 1.294033   |
| mmu04141 Protein processing in endoplasmic reticulum  | 0.110718688   | 1.226947   | 0.110719   | 0.679239   | 95         | 0.110719   | 0.889281   | 1.226947   | 0.889281   | 0.999734   | 95           | 0.889281    | 1.226947 | 1.226947   |
| mmu04145 Phagosome                                    | 0.112375923   | 1.218407   | 0.112376   | 0.679239   | 87         | 0.112376   | 0.887624   | 1.218407   | 0.887624   | 0.999734   | 87           | 0.887624    | 1.218407 | 1.218407   |
| mmu02010 ABC transporters                             | 0.112708176   | 1.245661   | 0.112708   | 0.679239   | 16         | 0.112708   | 0.887292   | 1.245661   | 0.887292   | 0.999734   | 16           | 0.887292    | 1.245661 | 1.245661   |
| mmu03320 PPAR signaling pathway                       | 0.115671792   | 1.207403   | 0.115672   | 0.679239   | 36         | 0.115672   | 0.884328   | 1.207403   | 0.884328   | 0.999734   | 36           | 0.884328    | 1.207403 | 1.207403   |
| mmu04066 HIF-1 signaling pathway                      | 0.121211934   | 1.176896   | 0.121212   | 0.679239   | 59         | 0.121212   | 0.878788   | 1.176896   | 0.878788   | 0.999734   | 59           | 0.878788    | 1.176896 | 1.176896   |
| mmu04730 Long-term depression                         | 0.121352536   | 1.179695   | 0.121353   | 0.679239   | 33         | 0.121353   | 0.878647   | 1.179695   | 0.878647   | 0.999734   | 33           | 0.878647    | 1.179695 | 1.179695   |
| mmu00260 Glycine, serine and threonine metabolism     | 0.13255882    | 1.132212   | 0.132559   | 0.679239   | 19         | 0.132559   | 0.867441   | 1.132212   | 0.867441   | 0.999734   | 19           | 0.867441    | 1.132212 | 1.132212   |
| mmu00051 Fructose and mannose metabolism              | 0.145028981   | 1.074977   | 0.145029   | 0.679239   | 18         | 0.145029   | 0.854971   | 1.074977   | 0.854971   | 0.999734   | 18           | 0.854971    | 1.074977 | 1.074977   |
| mmu04666 Fc gamma R-mediated phagocytosis             | 0.151140975   | 1.037371   | 0.151141   | 0.679239   | 47         | 0.151141   | 0.848859   | 1.037371   | 0.848859   | 0.999734   | 47           | 0.848859    | 1.037371 | 1.037371   |
| mmu04130 SNARE interactions in vesicular transport    | 0.153139211   | 1.036544   | 0.153139   | 0.679239   | 25         | 0.153139   | 0.846861   | 1.036544   | 0.846861   | 0.999734   | 25           | 0.846861    | 1.036544 | 1.036544   |
| mmu03410 Base excision repair                         | 0.155064524   | 1.030461   | 0.155065   | 0.679239   | 20         | 0.155065   | 0.844935   | 1.030461   | 0.844935   | 0.999734   | 20           | 0.844935    | 1.030461 | 1.030461   |
| mmu04620 Toll-like receptor signaling pathway         | 0.155141491   | 1.021715   | 0.155141   | 0.679239   | 45         | 0.155141   | 0.844859   | 1.021715   | 0.844859   | 0.999734   | 45           | 0.844859    | 1.021715 | 1.021715   |
| mmu04270 Vascular smooth muscle contraction           | 0.158566232   | 1.005513   | 0.158566   | 0.679239   | 51         | 0.158566   | 0.841434   | 1.005513   | 0.841434   | 0.999734   | 51           | 0.841434    | 1.005513 | 1.005513   |
| mmu04964 Proximal tubule bicarbonate reclamation      | 0.17009559    | 0.981533   | 0.170096   | 0.679239   | 10         | 0.170096   | 0.829904   | 0.981533   | 0.829904   | 0.999734   | 10           | 0.829904    | 0.981533 | 0.981533   |
| mmu04664 Fc epsilon RI signaling pathway              | 0.170878821   | 0.961015   | 0.170879   | 0.679239   | 34         | 0.170879   | 0.829121   | 0.961015   | 0.829121   | 0.999734   | 34           | 0.829121    | 0.961015 | 0.961015   |
| mmu00500 Starch and sucrose metabolism                | 0.175267492   | 0.956398   | 0.175267   | 0.679239   | 11         | 0.175267   | 0.824733   | 0.956398   | 0.824733   | 0.999734   | 11           | 0.824733    | 0.956398 | 0.956398   |
| mmu00620 Pyruvate metabolism                          | 0.176252458   | 0.94148    | 0.176252   | 0.679239   | 20         | 0.176252   | 0.823748   | 0.94148    | 0.823748   | 0.999734   | 20           | 0.823748    | 0.94148  | 0.94148    |
| mmu04966 Collecting duct acid secretion               | 0.183450733   | 0.919164   | 0.183451   | 0.679239   | 15         | 0.183451   | 0.816549   | 0.919164   | 0.816549   | 0.999734   | 15           | 0.816549    | 0.919164 | 0.919164   |
| mmu03060 Protein export                               | 0.188788311   | 0.898639   | 0.188788   | 0.679239   | 16         | 0.188788   | 0.811212   | 0.898639   | 0.811212   | 0.999734   | 16           | 0.811212    | 0.898639 | 0.898639   |
| mmu04530 Tight junction                               | 0.192912558   | 0.870295   | 0.192913   | 0.679239   | 64         | 0.192913   | 0.807087   | 0.870295   | 0.807087   | 0.999734   | 64           | 0.807087    | 0.870295 | 0.870295   |
| mmu04260 Cardiac muscle contraction                   | 0.207197555   | 0.822167   | 0.207198   | 0.679239   | 36         | 0.207198   | 0.792802   | 0.822167   | 0.792802   | 0.999734   | 36           | 0.792802    | 0.822167 | 0.822167   |
| mmu00565 Ether lipid metabolism                       | 0.20842096    | 0.824509   | 0.208421   | 0.679239   | 15         | 0.208421   | 0.791579   | 0.824509   | 0.791579   | 0.999734   | 15           | 0.791579    | 0.824509 | 0.824509   |
| mmu04917 Prolactin signaling pathway                  | 0.213039574   | 0.801986   | 0.21304    | 0.679239   | 35         | 0.21304    | 0.78696    | 0.801986   | 0.78696    | 0.999734   | 35           | 0.78696     | 0.801986 | 0.801986   |
| mmu00640 Propanoate metabolism                        | 0.21482957    | 0.803062   | 0.21483    | 0.679239   | 14         | 0.21483    | 0.78517    | 0.803062   | 0.78517    | 0.999734   | 14           | 0.78517     | 0.803062 | 0.803062   |
| mmu04920 Adipocytokine signaling pathway              | 0.215075603   | 0.793331   | 0.215076   | 0.679239   | 43         | 0.215076   | 0.784924   | 0.793331   | 0.784924   | 0.999734   | 43           | 0.784924    | 0.793331 | 0.793331   |
| mmu04672 Intestinal immune network for IgA production | 0.218324491   | 0.79748    | 0.218324   | 0.679239   | 15         | 0.218324   | 0.781676   | 0.79748    | 0.781676   | 0.999734   | 15           | 0.781676    | 0.79748  | 0.79748    |

Supplemental Table 5

|                                                                    |             |          |          |          |     |          |          |          |          |          |     |          |          |          |
|--------------------------------------------------------------------|-------------|----------|----------|----------|-----|----------|----------|----------|----------|----------|-----|----------|----------|----------|
| mmu04640 Hematopoietic cell lineage                                | 0.226369768 | 0.758957 | 0.22637  | 0.679239 | 30  | 0.22637  | 0.77363  | 0.758957 | 0.77363  | 0.999734 | 30  | 0.77363  | 0.758957 | 0.758957 |
| mmu03030 DNA replication                                           | 0.231621102 | 0.739661 | 0.231621 | 0.679239 | 25  | 0.231621 | 0.768379 | 0.739661 | 0.768379 | 0.999734 | 25  | 0.768379 | 0.739661 | 0.739661 |
| mmu00900 Terpenoid backbone biosynthesis                           | 0.236230431 | 0.732876 | 0.23623  | 0.679239 | 14  | 0.23623  | 0.76377  | 0.732876 | 0.76377  | 0.999734 | 14  | 0.76377  | 0.732876 | 0.732876 |
| mmu04010 MAPK signaling pathway                                    | 0.239104967 | 0.710595 | 0.239105 | 0.679239 | 121 | 0.239105 | 0.760895 | 0.710595 | 0.760895 | 0.999734 | 121 | 0.760895 | 0.710595 | 0.710595 |
| mmu00040 Pentose and glucuronate interconversions                  | 0.245142908 | 0.707921 | 0.245143 | 0.679239 | 10  | 0.245143 | 0.754857 | 0.707921 | 0.754857 | 0.999734 | 10  | 0.754857 | 0.707921 | 0.707921 |
| mmu04713 Circadian entrainment                                     | 0.254407499 | 0.664407 | 0.254407 | 0.679239 | 41  | 0.254407 | 0.745593 | 0.664407 | 0.745593 | 0.999734 | 41  | 0.745593 | 0.664407 | 0.664407 |
| mmu04970 Salivary secretion                                        | 0.255201669 | 0.661256 | 0.255202 | 0.679239 | 40  | 0.255202 | 0.744798 | 0.661256 | 0.744798 | 0.999734 | 40  | 0.744798 | 0.661256 | 0.661256 |
| mmu04150 mTOR signaling pathway                                    | 0.257596157 | 0.654393 | 0.257596 | 0.679239 | 34  | 0.257596 | 0.742404 | 0.654393 | 0.742404 | 0.999734 | 34  | 0.742404 | 0.654393 | 0.654393 |
| mmu04623 Cytosolic DNA-sensing pathway                             | 0.259791366 | 0.648536 | 0.259791 | 0.679239 | 27  | 0.259791 | 0.740209 | 0.648536 | 0.740209 | 0.999734 | 27  | 0.740209 | 0.648536 | 0.648536 |
| mmu04650 Natural killer cell mediated cytotoxicity                 | 0.261830009 | 0.640343 | 0.26183  | 0.679239 | 44  | 0.26183  | 0.73817  | 0.640343 | 0.73817  | 0.999734 | 44  | 0.73817  | 0.640343 | 0.640343 |
| mmu04390 Hippo signaling pathway                                   | 0.265645717 | 0.627602 | 0.265646 | 0.679239 | 72  | 0.265646 | 0.734354 | 0.627602 | 0.734354 | 0.999734 | 72  | 0.734354 | 0.627602 | 0.627602 |
| mmu04144 Endocytosis                                               | 0.273667988 | 0.602666 | 0.273668 | 0.679239 | 114 | 0.273668 | 0.726332 | 0.602666 | 0.726332 | 0.999734 | 114 | 0.726332 | 0.602666 | 0.602666 |
| mmu03050 Proteasome                                                | 0.276137128 | 0.598351 | 0.276137 | 0.679239 | 34  | 0.276137 | 0.723863 | 0.598351 | 0.723863 | 0.999734 | 34  | 0.723863 | 0.598351 | 0.598351 |
| mmu00250 Alanine, aspartate and glutamate metabolism               | 0.27655165  | 0.600198 | 0.276552 | 0.679239 | 16  | 0.276552 | 0.723448 | 0.600198 | 0.723448 | 0.999734 | 16  | 0.723448 | 0.600198 | 0.600198 |
| mmu04630 Jak-STAT signaling pathway                                | 0.282899094 | 0.57645  | 0.282899 | 0.679239 | 58  | 0.282899 | 0.717101 | 0.57645  | 0.717101 | 0.999734 | 58  | 0.717101 | 0.57645  | 0.57645  |
| mmu04146 Peroxisome                                                | 0.301301769 | 0.522705 | 0.301302 | 0.679239 | 49  | 0.301302 | 0.698698 | 0.522705 | 0.698698 | 0.999734 | 49  | 0.698698 | 0.522705 | 0.522705 |
| mmu04973 Carbohydrate digestion and absorption                     | 0.304510944 | 0.519498 | 0.304511 | 0.679239 | 13  | 0.304511 | 0.695489 | 0.519498 | 0.695489 | 0.999734 | 13  | 0.695489 | 0.519498 | 0.519498 |
| mmu04916 Melanogenesis                                             | 0.307341251 | 0.505392 | 0.307341 | 0.679239 | 42  | 0.307341 | 0.692659 | 0.505392 | 0.692659 | 0.999734 | 42  | 0.692659 | 0.505392 | 0.505392 |
| mmu00270 Cysteine and methionine metabolism                        | 0.310173357 | 0.502229 | 0.310173 | 0.679239 | 14  | 0.310173 | 0.689827 | 0.502229 | 0.689827 | 0.999734 | 14  | 0.689827 | 0.502229 | 0.502229 |
| mmu04726 Serotonergic synapse                                      | 0.313521713 | 0.48789  | 0.313522 | 0.679239 | 41  | 0.313522 | 0.686478 | 0.48789  | 0.686478 | 0.999734 | 41  | 0.686478 | 0.48789  | 0.48789  |
| mmu04725 Cholinergic synapse                                       | 0.315897214 | 0.481025 | 0.315897 | 0.679239 | 49  | 0.315897 | 0.684103 | 0.481025 | 0.684103 | 0.999734 | 49  | 0.684103 | 0.481025 | 0.481025 |
| mmu00590 Arachidonic acid metabolism                               | 0.324857522 | 0.458245 | 0.324858 | 0.679239 | 18  | 0.324858 | 0.675142 | 0.458245 | 0.675142 | 0.999734 | 18  | 0.675142 | 0.458245 | 0.458245 |
| mmu04975 Fat digestion and absorption                              | 0.325889383 | 0.45656  | 0.325889 | 0.679239 | 14  | 0.325889 | 0.674111 | 0.45656  | 0.674111 | 0.999734 | 14  | 0.674111 | 0.45656  | 0.45656  |
| mmu00020 Citrate cycle (TCA cycle)                                 | 0.336354886 | 0.427099 | 0.336355 | 0.679239 | 18  | 0.336355 | 0.663645 | 0.427099 | 0.663645 | 0.999734 | 18  | 0.663645 | 0.427099 | 0.427099 |
| mmu00562 Inositol phosphate metabolism                             | 0.336865197 | 0.423107 | 0.336865 | 0.679239 | 31  | 0.336865 | 0.663135 | 0.423107 | 0.663135 | 0.999734 | 31  | 0.663135 | 0.423107 | 0.423107 |
| mmu04612 Antigen processing and presentation                       | 0.338538076 | 0.418472 | 0.338538 | 0.679239 | 32  | 0.338538 | 0.661462 | 0.418472 | 0.661462 | 0.999734 | 32  | 0.661462 | 0.418472 | 0.418472 |
| mmu04080 Neuroactive ligand-receptor interaction                   | 0.338810562 | 0.416556 | 0.338811 | 0.679239 | 74  | 0.338811 | 0.661189 | 0.416556 | 0.661189 | 0.999734 | 74  | 0.661189 | 0.416556 | 0.416556 |
| mmu00510 N-Glycan biosynthesis                                     | 0.339434733 | 0.416607 | 0.339435 | 0.679239 | 28  | 0.339435 | 0.660565 | 0.416607 | 0.660565 | 0.999734 | 28  | 0.660565 | 0.416607 | 0.416607 |
| mmu04912 GnRH signaling pathway                                    | 0.342260472 | 0.407573 | 0.34226  | 0.679239 | 49  | 0.34226  | 0.65774  | 0.407573 | 0.65774  | 0.999734 | 49  | 0.65774  | 0.407573 | 0.407573 |
| mmu04744 Phototransduction                                         | 0.34470346  | 0.410336 | 0.344703 | 0.679239 | 10  | 0.344703 | 0.655297 | 0.410336 | 0.655297 | 0.999734 | 10  | 0.655297 | 0.410336 | 0.410336 |
| mmu00630 Glyoxylate and dicarboxylate metabolism                   | 0.346476973 | 0.399411 | 0.346477 | 0.679239 | 15  | 0.346477 | 0.653523 | 0.399411 | 0.653523 | 0.999734 | 15  | 0.653523 | 0.399411 | 0.399411 |
| mmu00380 Tryptophan metabolism                                     | 0.349349391 | 0.393931 | 0.349349 | 0.679239 | 10  | 0.349349 | 0.650651 | 0.393931 | 0.650651 | 0.999734 | 10  | 0.650651 | 0.393931 | 0.393931 |
| mmu04350 TGF-beta signaling pathway                                | 0.352055627 | 0.381186 | 0.352056 | 0.679239 | 40  | 0.352056 | 0.647944 | 0.381186 | 0.647944 | 0.999734 | 40  | 0.647944 | 0.381186 | 0.381186 |
| mmu04320 Dorsal-ventral axis formation                             | 0.355694497 | 0.374125 | 0.355694 | 0.679239 | 16  | 0.355694 | 0.644306 | 0.374125 | 0.644306 | 0.999734 | 16  | 0.644306 | 0.374125 | 0.374125 |
| mmu00561 Glycerolipid metabolism                                   | 0.357388564 | 0.367245 | 0.357389 | 0.679239 | 30  | 0.357389 | 0.642611 | 0.367245 | 0.642611 | 0.999734 | 30  | 0.642611 | 0.367245 | 0.367245 |
| mmu00980 Metabolism of xenobiotics by cytochrome P450              | 0.35814719  | 0.366008 | 0.358147 | 0.679239 | 21  | 0.358147 | 0.641853 | 0.366008 | 0.641853 | 0.999734 | 21  | 0.641853 | 0.366008 | 0.366008 |
| mmu00071 Fatty acid degradation                                    | 0.358261856 | 0.365776 | 0.358262 | 0.679239 | 22  | 0.358262 | 0.641738 | 0.365776 | 0.641738 | 0.999734 | 22  | 0.641738 | 0.365776 | 0.365776 |
| mmu04976 Bile secretion                                            | 0.361174429 | 0.357135 | 0.361174 | 0.679239 | 30  | 0.361174 | 0.638826 | 0.357135 | 0.638826 | 0.999734 | 30  | 0.638826 | 0.357135 | 0.357135 |
| mmu00480 Glutathione metabolism                                    | 0.364868295 | 0.347094 | 0.364868 | 0.679239 | 31  | 0.364868 | 0.635132 | 0.347094 | 0.635132 | 0.999734 | 31  | 0.635132 | 0.347094 | 0.347094 |
| mmu04723 Retrograde endocannabinoid signaling                      | 0.366932546 | 0.341305 | 0.366933 | 0.679239 | 42  | 0.366933 | 0.633067 | 0.341305 | 0.633067 | 0.999734 | 42  | 0.633067 | 0.341305 | 0.341305 |
| mmu00532 Glycosaminoglycan biosynthesis - chondroitin sulfate      | 0.38131003  | 0.308116 | 0.38131  | 0.679239 | 10  | 0.38131  | 0.61869  | 0.308116 | 0.61869  | 0.999734 | 10  | 0.61869  | 0.308116 | 0.308116 |
| mmu04918 Thyroid hormone synthesis                                 | 0.381777939 | 0.30211  | 0.381778 | 0.679239 | 33  | 0.381778 | 0.618222 | 0.30211  | 0.618222 | 0.999734 | 33  | 0.618222 | 0.30211  | 0.30211  |
| mmu04961 Endocrine and other factor-regulated calcium reabsorption | 0.382933075 | 0.299374 | 0.382933 | 0.679239 | 28  | 0.382933 | 0.617067 | 0.299374 | 0.617067 | 0.999734 | 28  | 0.617067 | 0.299374 | 0.299374 |
| mmu00830 Retinol metabolism                                        | 0.383374257 | 0.300331 | 0.383374 | 0.679239 | 13  | 0.383374 | 0.616626 | 0.300331 | 0.616626 | 0.999734 | 13  | 0.616626 | 0.300331 | 0.300331 |
| mmu04514 Cell adhesion molecules (CAMs)                            | 0.39842447  | 0.258001 | 0.398424 | 0.690147 | 65  | 0.398424 | 0.601576 | 0.258001 | 0.601576 | 0.999734 | 65  | 0.601576 | 0.258001 | 0.258001 |
| mmu00280 Valine, leucine and isoleucine degradation                | 0.401277929 | 0.251419 | 0.401278 | 0.690147 | 29  | 0.401278 | 0.598722 | 0.251419 | 0.598722 | 0.999734 | 29  | 0.598722 | 0.251419 | 0.251419 |
| mmu04728 Dopaminergic synapse                                      | 0.40537309  | 0.24004  | 0.405373 | 0.690147 | 63  | 0.405373 | 0.594627 | 0.24004  | 0.594627 | 0.999734 | 63  | 0.594627 | 0.24004  | 0.24004  |
| mmu00564 Glycerophospholipid metabolism                            | 0.406466948 | 0.237382 | 0.406467 | 0.690147 | 44  | 0.406467 | 0.593533 | 0.237382 | 0.593533 | 0.999734 | 44  | 0.593533 | 0.237382 | 0.237382 |
| mmu00650 Butanoate metabolism                                      | 0.422262111 | 0.198945 | 0.422262 | 0.707087 | 11  | 0.422262 | 0.577738 | 0.198945 | 0.577738 | 0.999734 | 11  | 0.577738 | 0.198945 | 0.198945 |
| mmu04070 Phosphatidylinositol signaling system                     | 0.4279736   | 0.182142 | 0.427974 | 0.707087 | 40  | 0.427974 | 0.572026 | 0.182142 | 0.572026 | 0.999734 | 40  | 0.572026 | 0.182142 | 0.182142 |

Supplemental Table 5

|                                                                |             |          |          |          |     |          |          |          |          |          |     |          |          |          |
|----------------------------------------------------------------|-------------|----------|----------|----------|-----|----------|----------|----------|----------|----------|-----|----------|----------|----------|
| mmu04722 Neurotrophin signaling pathway                        | 0.432867111 | 0.169428 | 0.432867 | 0.707087 | 66  | 0.432867 | 0.567133 | 0.169428 | 0.567133 | 0.999734 | 66  | 0.567133 | 0.169428 | 0.169428 |
| mmu00030 Pentose phosphate pathway                             | 0.438324531 | 0.156555 | 0.438325 | 0.707087 | 16  | 0.438325 | 0.561675 | 0.156555 | 0.561675 | 0.999734 | 16  | 0.561675 | 0.156555 | 0.156555 |
| mmu00970 Aminoacyl-tRNA biosynthesis                           | 0.442663512 | 0.145003 | 0.442664 | 0.707087 | 29  | 0.442664 | 0.557336 | 0.145003 | 0.557336 | 0.999734 | 29  | 0.557336 | 0.145003 | 0.145003 |
| mmu04151 PI3K-Akt signaling pathway                            | 0.447698154 | 0.1316   | 0.447698 | 0.707087 | 152 | 0.447698 | 0.552302 | 0.1316   | 0.552302 | 0.999734 | 152 | 0.552302 | 0.1316   | 0.1316   |
| mmu00140 Steroid hormone biosynthesis                          | 0.450165255 | 0.126677 | 0.450165 | 0.707087 | 13  | 0.450165 | 0.549835 | 0.126677 | 0.549835 | 0.999734 | 13  | 0.549835 | 0.126677 | 0.126677 |
| mmu00190 Oxidative phosphorylation                             | 0.451982783 | 0.120858 | 0.451983 | 0.707087 | 79  | 0.451983 | 0.548017 | 0.120858 | 0.548017 | 0.999734 | 79  | 0.548017 | 0.120858 | 0.120858 |
| mmu00230 Purine metabolism                                     | 0.455773191 | 0.111285 | 0.455773 | 0.707087 | 75  | 0.455773 | 0.544227 | 0.111285 | 0.544227 | 0.999734 | 75  | 0.544227 | 0.111285 | 0.111285 |
| mmu04622 RIG-I-like receptor signaling pathway                 | 0.463346669 | 0.092414 | 0.463347 | 0.707087 | 32  | 0.463347 | 0.536653 | 0.092414 | 0.536653 | 0.999734 | 32  | 0.536653 | 0.092414 | 0.092414 |
| mmu04974 Protein digestion and absorption                      | 0.469983969 | 0.075586 | 0.469984 | 0.707087 | 38  | 0.469984 | 0.530016 | 0.075586 | 0.530016 | 0.999734 | 38  | 0.530016 | 0.075586 | 0.075586 |
| mmu04064 NF-kappa B signaling pathway                          | 0.471202137 | 0.072472 | 0.471202 | 0.707087 | 42  | 0.471202 | 0.528798 | 0.072472 | 0.528798 | 0.999734 | 42  | 0.528798 | 0.072472 | 0.072472 |
| mmu04972 Pancreatic secretion                                  | 0.474518189 | 0.064144 | 0.474518 | 0.707087 | 37  | 0.474518 | 0.525482 | 0.064144 | 0.525482 | 0.999734 | 37  | 0.525482 | 0.064144 | 0.064144 |
| mmu04978 Mineral absorption                                    | 0.482591937 | 0.043941 | 0.482592 | 0.707087 | 28  | 0.482592 | 0.517408 | 0.043941 | 0.517408 | 0.999734 | 28  | 0.517408 | 0.043941 | 0.043941 |
| mmu00982 Drug metabolism - cytochrome P450                     | 0.488099539 | 0.030032 | 0.4881   | 0.707087 | 20  | 0.4881   | 0.5119   | 0.030032 | 0.5119   | 0.999734 | 20  | 0.5119   | 0.030032 | 0.030032 |
| mmu00100 Steroid biosynthesis                                  | 0.490324553 | 0.024541 | 0.490325 | 0.707087 | 12  | 0.490325 | 0.509675 | 0.024541 | 0.509675 | 0.999734 | 12  | 0.509675 | 0.024541 | 0.024541 |
| mmu04540 Gap junction                                          | 0.497952958 | 0.005147 | 0.497953 | 0.707087 | 45  | 0.497953 | 0.502047 | 0.005147 | 0.502047 | 0.999734 | 45  | 0.502047 | 0.005147 | 0.005147 |
| mmu04913 Ovarian steroidogenesis                               | 0.499587216 | 0.001042 | 0.499587 | 0.707087 | 18  | 0.499587 | 0.500413 | 0.001042 | 0.500413 | 0.999734 | 18  | 0.500413 | 0.001042 | 0.001042 |
| mmu00410 beta-Alanine metabolism                               | 0.502352303 | -0.00597 | 0.502352 | 0.707087 | 13  | 0.502352 | 0.497648 | -0.00597 | 0.497648 | 0.999734 | 13  | 0.497648 | -0.00597 | -0.00597 |
| mmu00534 Glycosaminoglycan biosynthesis - heparan sulfate / he | 0.503202757 | -0.00812 | 0.503203 | 0.707087 | 15  | 0.503203 | 0.496797 | -0.00812 | 0.496797 | 0.999734 | 15  | 0.496797 | -0.00812 | -0.00812 |
| mmu04914 Progesterone-mediated oocyte maturation               | 0.510992526 | -0.02765 | 0.510993 | 0.711896 | 41  | 0.510993 | 0.489007 | -0.02765 | 0.489007 | 0.999734 | 41  | 0.489007 | -0.02765 | -0.02765 |
| mmu00670 One carbon pool by folate                             | 0.537665035 | -0.0957  | 0.537665 | 0.742707 | 12  | 0.537665 | 0.462335 | -0.0957  | 0.462335 | 0.999734 | 12  | 0.462335 | -0.0957  | -0.0957  |
| mmu04727 GABAergic synapse                                     | 0.553900101 | -0.13614 | 0.5539   | 0.758284 | 33  | 0.5539   | 0.4461   | -0.13614 | 0.4461   | 0.999734 | 33  | 0.4461   | -0.13614 | -0.13614 |
| mmu04971 Gastric acid secretion                                | 0.558245599 | -0.14708 | 0.558246 | 0.758284 | 35  | 0.558246 | 0.441754 | -0.14708 | 0.441754 | 0.999734 | 35  | 0.441754 | -0.14708 | -0.14708 |
| mmu04962 Vasopressin-regulated water reabsorption              | 0.576491341 | -0.19378 | 0.576491 | 0.775394 | 31  | 0.576491 | 0.423509 | -0.19378 | 0.423509 | 0.999734 | 31  | 0.423509 | -0.19378 | -0.19378 |
| mmu04724 Glutamatergic synapse                                 | 0.580356526 | -0.20346 | 0.580357 | 0.775394 | 45  | 0.580357 | 0.419643 | -0.20346 | 0.419643 | 0.999734 | 45  | 0.419643 | -0.20346 | -0.20346 |
| mmu04720 Long-term potentiation                                | 0.586947393 | -0.22054 | 0.586947 | 0.777825 | 37  | 0.586947 | 0.413053 | -0.22054 | 0.413053 | 0.999734 | 37  | 0.413053 | -0.22054 | -0.22054 |
| mmu00240 Pyrimidine metabolism                                 | 0.597906518 | -0.2486  | 0.597907 | 0.778604 | 54  | 0.597907 | 0.402093 | -0.2486  | 0.402093 | 0.999734 | 54  | 0.402093 | -0.2486  | -0.2486  |
| mmu04114 Oocyte meiosis                                        | 0.598416239 | -0.24982 | 0.598416 | 0.778604 | 62  | 0.598416 | 0.401584 | -0.24982 | 0.401584 | 0.999734 | 62  | 0.401584 | -0.24982 | -0.24982 |
| mmu00514 Other types of O-glycan biosynthesis                  | 0.601865671 | -0.26169 | 0.601866 | 0.778604 | 14  | 0.601866 | 0.398134 | -0.26169 | 0.398134 | 0.999734 | 14  | 0.398134 | -0.26169 | -0.26169 |
| mmu04210 Apoptosis                                             | 0.613908578 | -0.29052 | 0.613909 | 0.782187 | 42  | 0.613909 | 0.386091 | -0.29052 | 0.386091 | 0.999734 | 42  | 0.386091 | -0.29052 | -0.29052 |
| mmu04340 Hedgehog signaling pathway                            | 0.614232472 | -0.29269 | 0.614232 | 0.782187 | 19  | 0.614232 | 0.385768 | -0.29269 | 0.385768 | 0.999734 | 19  | 0.385768 | -0.29269 | -0.29269 |
| mmu04911 Insulin secretion                                     | 0.638267167 | -0.355   | 0.638267 | 0.805095 | 45  | 0.638267 | 0.361733 | -0.355   | 0.361733 | 0.999734 | 45  | 0.361733 | -0.355   | -0.355   |
| mmu00310 Lysine degradation                                    | 0.642100246 | -0.36672 | 0.6421   | 0.805095 | 23  | 0.6421   | 0.3579   | -0.36672 | 0.3579   | 0.999734 | 23  | 0.3579   | -0.36672 | -0.36672 |
| mmu04960 Aldosterone-regulated sodium reabsorption             | 0.652878896 | -0.39582 | 0.652879 | 0.812361 | 22  | 0.652879 | 0.347121 | -0.39582 | 0.347121 | 0.999734 | 22  | 0.347121 | -0.39582 | -0.39582 |
| mmu04012 ErbB signaling pathway                                | 0.666294448 | -0.43162 | 0.666294 | 0.822773 | 37  | 0.666294 | 0.333706 | -0.43162 | 0.333706 | 0.999734 | 37  | 0.333706 | -0.43162 | -0.43162 |
| mmu04370 VEGF signaling pathway                                | 0.697087279 | -0.51971 | 0.697087 | 0.854325 | 33  | 0.697087 | 0.302913 | -0.51971 | 0.302913 | 0.999734 | 33  | 0.302913 | -0.51971 | -0.51971 |
| mmu04310 Wnt signaling pathway                                 | 0.72920444  | -0.61198 | 0.729204 | 0.873959 | 68  | 0.729204 | 0.270796 | -0.61198 | 0.270796 | 0.999734 | 68  | 0.270796 | -0.61198 | -0.61198 |
| mmu00563 Glycosylphosphatidylinositol(GPI)-anchor biosynthesis | 0.735450838 | -0.64018 | 0.735451 | 0.873959 | 13  | 0.735451 | 0.264549 | -0.64018 | 0.264549 | 0.999734 | 13  | 0.264549 | -0.64018 | -0.64018 |
| mmu04140 Regulation of autophagy                               | 0.740502215 | -0.65278 | 0.740502 | 0.873959 | 18  | 0.740502 | 0.259498 | -0.65278 | 0.259498 | 0.999734 | 18  | 0.259498 | -0.65278 | -0.65278 |
| mmu04742 Taste transduction                                    | 0.747400963 | -0.67896 | 0.747401 | 0.873959 | 11  | 0.747401 | 0.252599 | -0.67896 | 0.252599 | 0.999734 | 11  | 0.252599 | -0.67896 | -0.67896 |
| mmu03430 Mismatch repair                                       | 0.753084919 | -0.69463 | 0.753085 | 0.873959 | 15  | 0.753085 | 0.246915 | -0.69463 | 0.246915 | 0.999734 | 15  | 0.246915 | -0.69463 | -0.69463 |
| mmu04520 Adherens junction                                     | 0.75667361  | -0.69877 | 0.756674 | 0.873959 | 43  | 0.756674 | 0.243326 | -0.69877 | 0.243326 | 0.999734 | 43  | 0.243326 | -0.69877 | -0.69877 |
| mmu04020 Calcium signaling pathway                             | 0.760475014 | -0.70956 | 0.760475 | 0.873959 | 78  | 0.760475 | 0.239525 | -0.70956 | 0.239525 | 0.999734 | 78  | 0.239525 | -0.70956 | -0.70956 |
| mmu04910 Insulin signaling pathway                             | 0.762927212 | -0.71755 | 0.762927 | 0.873959 | 78  | 0.762927 | 0.237073 | -0.71755 | 0.237073 | 0.999734 | 78  | 0.237073 | -0.71755 | -0.71755 |
| mmu04115 p53 signaling pathway                                 | 0.763432921 | -0.72221 | 0.763433 | 0.873959 | 34  | 0.763433 | 0.236567 | -0.72221 | 0.236567 | 0.999734 | 34  | 0.236567 | -0.72221 | -0.72221 |
| mmu04810 Regulation of actin cytoskeleton                      | 0.773139912 | -0.75059 | 0.77314  | 0.873959 | 110 | 0.77314  | 0.22686  | -0.75059 | 0.22686  | 0.999734 | 110 | 0.22686  | -0.75059 | -0.75059 |
| mmu03040 Spliceosome                                           | 0.779687831 | -0.77401 | 0.779688 | 0.873959 | 65  | 0.779688 | 0.220312 | -0.77401 | 0.220312 | 0.999734 | 65  | 0.220312 | -0.77401 | -0.77401 |
| mmu04512 ECM-receptor interaction                              | 0.788555614 | -0.80599 | 0.788556 | 0.873959 | 41  | 0.788556 | 0.211444 | -0.80599 | 0.211444 | 0.999734 | 41  | 0.211444 | -0.80599 | -0.80599 |
| mmu04330 Notch signaling pathway                               | 0.789325323 | -0.81127 | 0.789325 | 0.873959 | 26  | 0.789325 | 0.210675 | -0.81127 | 0.210675 | 0.999734 | 26  | 0.210675 | -0.81127 | -0.81127 |
| mmu03420 Nucleotide excision repair                            | 0.790157031 | -0.81369 | 0.790157 | 0.873959 | 30  | 0.790157 | 0.209843 | -0.81369 | 0.209843 | 0.999734 | 30  | 0.209843 | -0.81369 | -0.81369 |
| mmu04510 Focal adhesion                                        | 0.793533163 | -0.82063 | 0.793533 | 0.873959 | 98  | 0.793533 | 0.206467 | -0.82063 | 0.206467 | 0.999734 | 98  | 0.206467 | -0.82063 | -0.82063 |



Supplemental Table 5

|                                               |             |          |          |          |     |          |          |          |          |          |     |          |          |          |
|-----------------------------------------------|-------------|----------|----------|----------|-----|----------|----------|----------|----------|----------|-----|----------|----------|----------|
| mmu00860 Porphyrin and chlorophyll metabolism | 0.800781652 | -0.86313 | 0.800782 | 0.876023 | 16  | 0.800782 | 0.199218 | -0.86313 | 0.199218 | 0.999734 | 16  | 0.199218 | -0.86313 | -0.86313 |
| mmu03018 RNA degradation                      | 0.808399162 | -0.8765  | 0.808399 | 0.87846  | 44  | 0.808399 | 0.191601 | -0.8765  | 0.191601 | 0.999734 | 44  | 0.191601 | -0.8765  | -0.8765  |
| mmu04110 Cell cycle                           | 0.822038647 | -0.92663 | 0.822039 | 0.887366 | 64  | 0.822039 | 0.177961 | -0.92663 | 0.177961 | 0.999734 | 64  | 0.177961 | -0.92663 | -0.92663 |
| mmu03010 Ribosome                             | 0.828048026 | -0.95015 | 0.828048 | 0.887973 | 78  | 0.828048 | 0.171952 | -0.95015 | 0.171952 | 0.999734 | 78  | 0.171952 | -0.95015 | -0.95015 |
| mmu03020 RNA polymerase                       | 0.866774829 | -1.1345  | 0.866775 | 0.912406 | 16  | 0.866775 | 0.133225 | -1.1345  | 0.133225 | 0.999734 | 16  | 0.133225 | -1.1345  | -1.1345  |
| mmu04710 Circadian rhythm                     | 0.867504159 | -1.13648 | 0.867504 | 0.912406 | 17  | 0.867504 | 0.132496 | -1.13648 | 0.132496 | 0.999734 | 17  | 0.132496 | -1.13648 | -1.13648 |
| mmu03440 Homologous recombination             | 0.867625146 | -1.1357  | 0.867625 | 0.912406 | 18  | 0.867625 | 0.132375 | -1.1357  | 0.132375 | 0.999734 | 18  | 0.132375 | -1.1357  | -1.1357  |
| mmu04740 Olfactory transduction               | 0.884065967 | -1.19827 | 0.884066 | 0.923736 | 161 | 0.884066 | 0.115934 | -1.19827 | 0.115934 | 0.999734 | 161 | 0.115934 | -1.19827 | -1.19827 |
| mmu03008 Ribosome biogenesis in eukaryotes    | 0.914551454 | -1.38598 | 0.914551 | 0.945848 | 39  | 0.914551 | 0.085449 | -1.38598 | 0.085449 | 0.999734 | 39  | 0.085449 | -1.38598 | -1.38598 |
| mmu04360 Axon guidance                        | 0.916833898 | -1.39347 | 0.916834 | 0.945848 | 61  | 0.916834 | 0.083166 | -1.39347 | 0.083166 | 0.999734 | 61  | 0.083166 | -1.39347 | -1.39347 |
| mmu03460 Fanconi anemia pathway               | 0.926567177 | -1.48347 | 0.926567 | 0.949877 | 23  | 0.926567 | 0.073433 | -1.48347 | 0.073433 | 0.999734 | 23  | 0.073433 | -1.48347 | -1.48347 |
| mmu03022 Basal transcription factors          | 0.964471225 | -1.86462 | 0.964471 | 0.977515 | 18  | 0.964471 | 0.035529 | -1.86462 | 0.035529 | 0.999734 | 18  | 0.035529 | -1.86462 | -1.86462 |
| mmu03015 mRNA surveillance pathway            | 0.965520615 | -1.8382  | 0.965521 | 0.977515 | 52  | 0.965521 | 0.034479 | -1.8382  | 0.034479 | 0.999734 | 52  | 0.034479 | -1.8382  | -1.8382  |
| mmu04120 Ubiquitin mediated proteolysis       | 0.976242804 | -1.99902 | 0.976243 | 0.982269 | 78  | 0.976243 | 0.023757 | -1.99902 | 0.023757 | 0.999734 | 78  | 0.023757 | -1.99902 | -1.99902 |
| mmu03013 RNA transport                        | 0.992794018 | -2.47271 | 0.992794 | 0.992794 | 93  | 0.992794 | 0.007206 | -2.47271 | 0.007206 | 0.999734 | 93  | 0.007206 | -2.47271 | -2.47271 |

Supplemental Table 6

| KEGG_ID                                               | greater.p.geo | greater.st | greater.p. | greater.q. | greater.se | greater.ex | less.p.geo | less.stat. |            | less.set.siz |   | stats.stat. |          |            |          |
|-------------------------------------------------------|---------------|------------|------------|------------|------------|------------|------------|------------|------------|--------------|---|-------------|----------|------------|----------|
|                                                       | mean          | at.mean    | val        | val        | t.size     | p1         | mean       | mean       | less.p.val | less.q.val   | e | less.exp1   | mean     | stats.exp1 |          |
| mmu04141 Protein processing in endoplasmic reticulum  | 0.000410681   | 3.40784    | 0.000411   | 0.064477   | 95         | 0.000411   | 0.999589   | 3.40784    | 0.999589   | 0.999589     |   | 95          | 0.999589 | 3.40784    | 3.40784  |
| mmu04142 Lysosome                                     | 0.00256712    | 2.837921   | 0.002567   | 0.201519   | 82         | 0.002567   | 0.997433   | 2.837921   | 0.997433   | 0.999589     |   | 82          | 0.997433 | 2.837921   | 2.837921 |
| mmu04145 Phagosome                                    | 0.005421831   | 2.578284   | 0.005422   | 0.283742   | 81         | 0.005422   | 0.994578   | 2.578284   | 0.994578   | 0.999589     |   | 81          | 0.994578 | 2.578284   | 2.578284 |
| mmu03060 Protein export                               | 0.0072676     | 2.585855   | 0.007268   | 0.285253   | 17         | 0.007268   | 0.992732   | 2.585855   | 0.992732   | 0.999589     |   | 17          | 0.992732 | 2.585855   | 2.585855 |
| mmu04130 SNARE interactions in vesicular transport    | 0.012816358   | 2.311015   | 0.012816   | 0.399603   | 24         | 0.012816   | 0.987184   | 2.311015   | 0.987184   | 0.999589     |   | 24          | 0.987184 | 2.311015   | 2.311015 |
| mmu00330 Arginine and proline metabolism              | 0.016290906   | 2.226078   | 0.016291   | 0.399603   | 22         | 0.016291   | 0.983709   | 2.226078   | 0.983709   | 0.999589     |   | 22          | 0.983709 | 2.226078   | 2.226078 |
| mmu04380 Osteoclast differentiation                   | 0.021882925   | 2.043864   | 0.021883   | 0.399603   | 59         | 0.021883   | 0.978117   | 2.043864   | 0.978117   | 0.999589     |   | 59          | 0.978117 | 2.043864   | 2.043864 |
| mmu04610 Complement and coagulation cascades          | 0.02262682    | 2.086324   | 0.022627   | 0.399603   | 20         | 0.022627   | 0.977373   | 2.086324   | 0.977373   | 0.999589     |   | 20          | 0.977373 | 2.086324   | 2.086324 |
| mmu04066 HIF-1 signaling pathway                      | 0.022907167   | 2.021484   | 0.022907   | 0.399603   | 60         | 0.022907   | 0.977093   | 2.021484   | 0.977093   | 0.999589     |   | 60          | 0.977093 | 2.021484   | 2.021484 |
| mmu04151 PI3K-Akt signaling pathway                   | 0.028479655   | 1.910993   | 0.02848    | 0.447131   | 152        | 0.02848    | 0.97152    | 1.910993   | 0.97152    | 0.999589     |   | 152         | 0.97152  | 1.910993   | 1.910993 |
| mmu00531 Glycosaminoglycan degradation                | 0.047773239   | 1.76589    | 0.047773   | 0.601667   | 13         | 0.047773   | 0.952227   | 1.76589    | 0.952227   | 0.999589     |   | 13          | 0.952227 | 1.76589    | 1.76589  |
| mmu04660 T cell receptor signaling pathway            | 0.049580282   | 1.671445   | 0.04958    | 0.601667   | 46         | 0.04958    | 0.95042    | 1.671445   | 0.95042    | 0.999589     |   | 46          | 0.95042  | 1.671445   | 1.671445 |
| mmu04721 Synaptic vesicle cycle                       | 0.056532934   | 1.606178   | 0.056533   | 0.601667   | 36         | 0.056533   | 0.943467   | 1.606178   | 0.943467   | 0.999589     |   | 36          | 0.943467 | 1.606178   | 1.606178 |
| mmu04668 TNF signaling pathway                        | 0.063580618   | 1.539694   | 0.063581   | 0.601667   | 55         | 0.063581   | 0.936419   | 1.539694   | 0.936419   | 0.999589     |   | 55          | 0.936419 | 1.539694   | 1.539694 |
| mmu04144 Endocytosis                                  | 0.068911549   | 1.489342   | 0.068912   | 0.601667   | 112        | 0.068912   | 0.931088   | 1.489342   | 0.931088   | 0.999589     |   | 112         | 0.931088 | 1.489342   | 1.489342 |
| mmu00520 Amino sugar and nucleotide sugar metabolism  | 0.07018986    | 1.496376   | 0.07019    | 0.601667   | 28         | 0.07019    | 0.92981    | 1.496376   | 0.92981    | 0.999589     |   | 28          | 0.92981  | 1.496376   | 1.496376 |
| mmu00010 Glycolysis / Gluconeogenesis                 | 0.070506721   | 1.497907   | 0.070507   | 0.601667   | 26         | 0.070507   | 0.929493   | 1.497907   | 0.929493   | 0.999589     |   | 26          | 0.929493 | 1.497907   | 1.497907 |
| mmu04060 Cytokine-cytokine receptor interaction       | 0.072753691   | 1.464812   | 0.072754   | 0.601667   | 77         | 0.072754   | 0.927246   | 1.464812   | 0.927246   | 0.999589     |   | 77          | 0.927246 | 1.464812   | 1.464812 |
| mmu04670 Leukocyte transendothelial migration         | 0.072813171   | 1.46715    | 0.072813   | 0.601667   | 52         | 0.072813   | 0.927187   | 1.46715    | 0.927187   | 0.999589     |   | 52          | 0.927187 | 1.46715    | 1.46715  |
| mmu00510 N-Glycan biosynthesis                        | 0.08869987    | 1.373637   | 0.0887     | 0.687069   | 25         | 0.0887     | 0.9113     | 1.373637   | 0.9113     | 0.999589     |   | 25          | 0.9113   | 1.373637   | 1.373637 |
| mmu04662 B cell receptor signaling pathway            | 0.097223618   | 1.314282   | 0.097224   | 0.687069   | 33         | 0.097224   | 0.902776   | 1.314282   | 0.902776   | 0.999589     |   | 33          | 0.902776 | 1.314282   | 1.314282 |
| mmu04620 Toll-like receptor signaling pathway         | 0.101907706   | 1.281579   | 0.101908   | 0.687069   | 45         | 0.101908   | 0.898092   | 1.281579   | 0.898092   | 0.999589     |   | 45          | 0.898092 | 1.281579   | 1.281579 |
| mmu00600 Sphingolipid metabolism                      | 0.103341056   | 1.28633    | 0.103341   | 0.687069   | 20         | 0.103341   | 0.896659   | 1.28633    | 0.896659   | 0.999589     |   | 20          | 0.896659 | 1.28633    | 1.28633  |
| mmu04530 Tight junction                               | 0.105029704   | 1.261249   | 0.10503    | 0.687069   | 59         | 0.10503    | 0.89497    | 1.261249   | 0.89497    | 0.999589     |   | 59          | 0.89497  | 1.261249   | 1.261249 |
| mmu04970 Salivary secretion                           | 0.137949921   | 1.098335   | 0.13795    | 0.726789   | 38         | 0.13795    | 0.86205    | 1.098335   | 0.86205    | 0.999589     |   | 38          | 0.86205  | 1.098335   | 1.098335 |
| mmu04150 mTOR signaling pathway                       | 0.147180746   | 1.056527   | 0.147181   | 0.726789   | 36         | 0.147181   | 0.852819   | 1.056527   | 0.852819   | 0.999589     |   | 36          | 0.852819 | 1.056527   | 1.056527 |
| mmu04728 Dopaminergic synapse                         | 0.148175845   | 1.049083   | 0.148176   | 0.726789   | 64         | 0.148176   | 0.851824   | 1.049083   | 0.851824   | 0.999589     |   | 64          | 0.851824 | 1.049083   | 1.049083 |
| mmu04062 Chemokine signaling pathway                  | 0.149672508   | 1.042138   | 0.149673   | 0.726789   | 64         | 0.149673   | 0.850327   | 1.042138   | 0.850327   | 0.999589     |   | 64          | 0.850327 | 1.042138   | 1.042138 |
| mmu04810 Regulation of actin cytoskeleton             | 0.150480739   | 1.037346   | 0.150481   | 0.726789   | 102        | 0.150481   | 0.849519   | 1.037346   | 0.849519   | 0.999589     |   | 102         | 0.849519 | 1.037346   | 1.037346 |
| mmu00511 Other glycan degradation                     | 0.155592363   | 1.041598   | 0.155592   | 0.726789   | 11         | 0.155592   | 0.844408   | 1.041598   | 0.844408   | 0.999589     |   | 11          | 0.844408 | 1.041598   | 1.041598 |
| mmu04915 Estrogen signaling pathway                   | 0.166969638   | 0.972487   | 0.16697    | 0.726789   | 46         | 0.16697    | 0.83303    | 0.972487   | 0.83303    | 0.999589     |   | 46          | 0.83303  | 0.972487   | 0.972487 |
| mmu04725 Cholinergic synapse                          | 0.167010813   | 0.971296   | 0.167011   | 0.726789   | 51         | 0.167011   | 0.832989   | 0.971296   | 0.832989   | 0.999589     |   | 51          | 0.832989 | 0.971296   | 0.971296 |
| mmu04640 Hematopoietic cell lineage                   | 0.171095573   | 0.960995   | 0.171096   | 0.726789   | 29         | 0.171096   | 0.828904   | 0.960995   | 0.828904   | 0.999589     |   | 29          | 0.828904 | 0.960995   | 0.960995 |
| mmu04672 Intestinal immune network for IgA production | 0.17254049    | 0.967597   | 0.17254    | 0.726789   | 16         | 0.17254    | 0.82746    | 0.967597   | 0.82746    | 0.999589     |   | 16          | 0.82746  | 0.967597   | 0.967597 |
| mmu04510 Focal adhesion                               | 0.173330634   | 0.943532   | 0.173331   | 0.726789   | 99         | 0.173331   | 0.826669   | 0.943532   | 0.826669   | 0.999589     |   | 99          | 0.826669 | 0.943532   | 0.943532 |
| mmu04270 Vascular smooth muscle contraction           | 0.179922089   | 0.920005   | 0.179922   | 0.726789   | 52         | 0.179922   | 0.820078   | 0.920005   | 0.820078   | 0.999589     |   | 52          | 0.820078 | 0.920005   | 0.920005 |
| mmu04920 Adipocytokine signaling pathway              | 0.184887989   | 0.902699   | 0.184888   | 0.726789   | 41         | 0.184888   | 0.815112   | 0.902699   | 0.815112   | 0.999589     |   | 41          | 0.815112 | 0.902699   | 0.902699 |
| mmu00051 Fructose and mannose metabolism              | 0.186068469   | 0.904496   | 0.186068   | 0.726789   | 18         | 0.186068   | 0.813932   | 0.904496   | 0.813932   | 0.999589     |   | 18          | 0.813932 | 0.904496   | 0.904496 |
| mmu04612 Antigen processing and presentation          | 0.191192234   | 0.881331   | 0.191192   | 0.726789   | 31         | 0.191192   | 0.808808   | 0.881331   | 0.808808   | 0.999589     |   | 31          | 0.808808 | 0.881331   | 0.881331 |
| mmu04320 Dorso-ventral axis formation                 | 0.194565221   | 0.876124   | 0.194565   | 0.726789   | 14         | 0.194565   | 0.805435   | 0.876124   | 0.805435   | 0.999589     |   | 14          | 0.805435 | 0.876124   | 0.876124 |
| mmu00562 Inositol phosphate metabolism                | 0.196100906   | 0.861786   | 0.196101   | 0.726789   | 33         | 0.196101   | 0.803899   | 0.861786   | 0.803899   | 0.999589     |   | 33          | 0.803899 | 0.861786   | 0.861786 |
| mmu04664 Fc epsilon RI signaling pathway              | 0.196574212   | 0.861079   | 0.196574   | 0.726789   | 32         | 0.196574   | 0.803426   | 0.861079   | 0.803426   | 0.999589     |   | 32          | 0.803426 | 0.861079   | 0.861079 |
| mmu04722 Neurotrophin signaling pathway               | 0.208669508   | 0.814275   | 0.20867    | 0.726789   | 63         | 0.20867    | 0.79133    | 0.814275   | 0.79133    | 0.999589     |   | 63          | 0.79133  | 0.814275   | 0.814275 |
| mmu04976 Bile secretion                               | 0.214490861   | 0.798052   | 0.214491   | 0.726789   | 25         | 0.214491   | 0.785509   | 0.798052   | 0.785509   | 0.999589     |   | 25          | 0.785509 | 0.798052   | 0.798052 |
| mmu04070 Phosphatidylinositol signaling system        | 0.215208537   | 0.79247    | 0.215209   | 0.726789   | 42         | 0.215209   | 0.784791   | 0.79247    | 0.784791   | 0.999589     |   | 42          | 0.784791 | 0.79247    | 0.79247  |
| mmu04621 NOD-like receptor signaling pathway          | 0.218522603   | 0.786649   | 0.218523   | 0.726789   | 19         | 0.218523   | 0.781477   | 0.786649   | 0.781477   | 0.999589     |   | 19          | 0.781477 | 0.786649   | 0.786649 |
| mmu00260 Glycine, serine and threonine metabolism     | 0.220532982   | 0.780779   | 0.220533   | 0.726789   | 16         | 0.220533   | 0.779467   | 0.780779   | 0.779467   | 0.999589     |   | 16          | 0.779467 | 0.780779   | 0.780779 |
| mmu04622 RIG-I-like receptor signaling pathway        | 0.229145122   | 0.747621   | 0.229145   | 0.726789   | 32         | 0.229145   | 0.770855   | 0.747621   | 0.770855   | 0.999589     |   | 32          | 0.770855 | 0.747621   | 0.747621 |

Supplemental Table 6

|                                                             |             |          |          |          |     |          |          |          |          |          |     |          |          |          |
|-------------------------------------------------------------|-------------|----------|----------|----------|-----|----------|----------|----------|----------|----------|-----|----------|----------|----------|
| mmu00564 Glycerophospholipid metabolism                     | 0.233098535 | 0.732025 | 0.233099 | 0.726789 | 44  | 0.233099 | 0.766901 | 0.732025 | 0.766901 | 0.999589 | 44  | 0.766901 | 0.732025 | 0.732025 |
| mmu04020 Calcium signaling pathway                          | 0.234958518 | 0.724495 | 0.234959 | 0.726789 | 75  | 0.234959 | 0.765041 | 0.724495 | 0.765041 | 0.999589 | 75  | 0.765041 | 0.724495 | 0.724495 |
| mmu03050 Proteasome                                         | 0.236865942 | 0.722566 | 0.236866 | 0.726789 | 33  | 0.236866 | 0.763134 | 0.722566 | 0.763134 | 0.999589 | 33  | 0.763134 | 0.722566 | 0.722566 |
| mmu03018 RNA degradation                                    | 0.240720025 | 0.707148 | 0.24072  | 0.726789 | 43  | 0.24072  | 0.75928  | 0.707148 | 0.75928  | 0.999589 | 43  | 0.75928  | 0.707148 | 0.707148 |
| mmu04966 Collecting duct acid secretion                     | 0.260230849 | 0.65042  | 0.260231 | 0.770873 | 16  | 0.260231 | 0.739769 | 0.65042  | 0.739769 | 0.999589 | 16  | 0.739769 | 0.65042  | 0.65042  |
| mmu00970 Aminoacyl-tRNA biosynthesis                        | 0.269913417 | 0.617824 | 0.269913 | 0.776718 | 26  | 0.269913 | 0.730087 | 0.617824 | 0.730087 | 0.999589 | 26  | 0.730087 | 0.617824 | 0.617824 |
| mmu00052 Galactose metabolism                               | 0.272098632 | 0.615357 | 0.272099 | 0.776718 | 14  | 0.272099 | 0.727901 | 0.615357 | 0.727901 | 0.999589 | 14  | 0.727901 | 0.615357 | 0.615357 |
| mmu04514 Cell adhesion molecules (CAMs)                     | 0.278665    | 0.588644 | 0.278665 | 0.778254 | 55  | 0.278665 | 0.721335 | 0.588644 | 0.721335 | 0.999589 | 55  | 0.721335 | 0.588644 | 0.588644 |
| mmu04010 MAPK signaling pathway                             | 0.283407398 | 0.573783 | 0.283407 | 0.778254 | 120 | 0.283407 | 0.716593 | 0.573783 | 0.716593 | 0.999589 | 120 | 0.716593 | 0.573783 | 0.573783 |
| mmu00563 Glycosylphosphatidylinositol(GPI)-anchor biosynthe | 0.291086339 | 0.559921 | 0.291086 | 0.778254 | 13  | 0.291086 | 0.708914 | 0.559921 | 0.708914 | 0.999589 | 13  | 0.708914 | 0.559921 | 0.559921 |
| mmu01040 Biosynthesis of unsaturated fatty acids            | 0.29277543  | 0.55393  | 0.292775 | 0.778254 | 12  | 0.292775 | 0.707225 | 0.55393  | 0.707225 | 0.999589 | 12  | 0.707225 | 0.55393  | 0.55393  |
| mmu04914 Progesterone-mediated oocyte maturation            | 0.297421842 | 0.53432  | 0.297422 | 0.778254 | 39  | 0.297422 | 0.702578 | 0.53432  | 0.702578 | 0.999589 | 39  | 0.702578 | 0.53432  | 0.53432  |
| mmu00620 Pyruvate metabolism                                | 0.315040684 | 0.486325 | 0.315041 | 0.780942 | 17  | 0.315041 | 0.684959 | 0.486325 | 0.684959 | 0.999589 | 17  | 0.684959 | 0.486325 | 0.486325 |
| mmu04912 GnRH signaling pathway                             | 0.319408718 | 0.471096 | 0.319409 | 0.780942 | 48  | 0.319409 | 0.680591 | 0.471096 | 0.680591 | 0.999589 | 48  | 0.680591 | 0.471096 | 0.471096 |
| mmu00270 Cysteine and methionine metabolism                 | 0.320476872 | 0.471943 | 0.320477 | 0.780942 | 14  | 0.320477 | 0.679523 | 0.471943 | 0.679523 | 0.999589 | 14  | 0.679523 | 0.471943 | 0.471943 |
| mmu04260 Cardiac muscle contraction                         | 0.32929606  | 0.444547 | 0.329296 | 0.780942 | 37  | 0.329296 | 0.670704 | 0.444547 | 0.670704 | 0.999589 | 37  | 0.670704 | 0.444547 | 0.444547 |
| mmu00514 Other types of O-glycan biosynthesis               | 0.331392716 | 0.444333 | 0.331393 | 0.780942 | 12  | 0.331393 | 0.668607 | 0.444333 | 0.668607 | 0.999589 | 12  | 0.668607 | 0.444333 | 0.444333 |
| mmu04911 Insulin secretion                                  | 0.335792962 | 0.425557 | 0.335793 | 0.780942 | 42  | 0.335793 | 0.664207 | 0.425557 | 0.664207 | 0.999589 | 42  | 0.664207 | 0.425557 | 0.425557 |
| mmu04512 ECM-receptor interaction                           | 0.337865866 | 0.419898 | 0.337866 | 0.780942 | 41  | 0.337866 | 0.662134 | 0.419898 | 0.662134 | 0.999589 | 41  | 0.662134 | 0.419898 | 0.419898 |
| mmu00350 Tyrosine metabolism                                | 0.338242267 | 0.422415 | 0.338242 | 0.780942 | 13  | 0.338242 | 0.661758 | 0.422415 | 0.661758 | 0.999589 | 13  | 0.661758 | 0.422415 | 0.422415 |
| mmu04917 Prolactin signaling pathway                        | 0.345075897 | 0.400737 | 0.345076 | 0.781475 | 36  | 0.345076 | 0.654924 | 0.400737 | 0.654924 | 0.999589 | 36  | 0.654924 | 0.400737 | 0.400737 |
| mmu00410 beta-Alanine metabolism                            | 0.365436902 | 0.349175 | 0.365437 | 0.781475 | 11  | 0.365437 | 0.634563 | 0.349175 | 0.634563 | 0.999589 | 11  | 0.634563 | 0.349175 | 0.349175 |
| mmu04080 Neuroactive ligand-receptor interaction            | 0.366892041 | 0.340761 | 0.366892 | 0.781475 | 74  | 0.366892 | 0.633108 | 0.340761 | 0.633108 | 0.999589 | 74  | 0.633108 | 0.340761 | 0.340761 |
| mmu00670 One carbon pool by folate                          | 0.368238395 | 0.341382 | 0.368238 | 0.781475 | 11  | 0.368238 | 0.631762 | 0.341382 | 0.631762 | 0.999589 | 11  | 0.631762 | 0.341382 | 0.341382 |
| mmu04666 Fc gamma R-mediated phagocytosis                   | 0.376125296 | 0.316884 | 0.376125 | 0.781475 | 42  | 0.376125 | 0.623875 | 0.316884 | 0.623875 | 0.999589 | 42  | 0.623875 | 0.316884 | 0.316884 |
| mmu04730 Long-term depression                               | 0.379922246 | 0.307398 | 0.379922 | 0.781475 | 31  | 0.379922 | 0.620078 | 0.307398 | 0.620078 | 0.999589 | 31  | 0.620078 | 0.307398 | 0.307398 |
| mmu04720 Long-term potentiation                             | 0.391215532 | 0.277465 | 0.391216 | 0.781475 | 35  | 0.391216 | 0.608784 | 0.277465 | 0.608784 | 0.999589 | 35  | 0.608784 | 0.277465 | 0.277465 |
| mmu04520 Adherens junction                                  | 0.391218294 | 0.277177 | 0.391218 | 0.781475 | 38  | 0.391218 | 0.608782 | 0.277177 | 0.608782 | 0.999589 | 38  | 0.608782 | 0.277177 | 0.277177 |
| mmu04623 Cytosolic DNA-sensing pathway                      | 0.394934757 | 0.268268 | 0.394935 | 0.781475 | 28  | 0.394935 | 0.605065 | 0.268268 | 0.605065 | 0.999589 | 28  | 0.605065 | 0.268268 | 0.268268 |
| mmu04713 Circadian entrainment                              | 0.395951298 | 0.265042 | 0.395951 | 0.781475 | 37  | 0.395951 | 0.604049 | 0.265042 | 0.604049 | 0.999589 | 37  | 0.604049 | 0.265042 | 0.265042 |
| mmu00980 Metabolism of xenobiotics by cytochrome P450       | 0.401314826 | 0.251612 | 0.401315 | 0.781475 | 21  | 0.401315 | 0.598685 | 0.251612 | 0.598685 | 0.999589 | 21  | 0.598685 | 0.251612 | 0.251612 |
| mmu03320 PPAR signaling pathway                             | 0.403936897 | 0.244311 | 0.403937 | 0.781475 | 30  | 0.403937 | 0.596063 | 0.244311 | 0.596063 | 0.999589 | 30  | 0.596063 | 0.244311 | 0.244311 |
| mmu00250 Alanine, aspartate and glutamate metabolism        | 0.407632705 | 0.235851 | 0.407633 | 0.781475 | 15  | 0.407633 | 0.592367 | 0.235851 | 0.592367 | 0.999589 | 15  | 0.592367 | 0.235851 | 0.235851 |
| mmu04972 Pancreatic secretion                               | 0.408669735 | 0.232036 | 0.40867  | 0.781475 | 36  | 0.40867  | 0.59133  | 0.232036 | 0.59133  | 0.999589 | 36  | 0.59133  | 0.232036 | 0.232036 |
| mmu04630 Jak-STAT signaling pathway                         | 0.413136467 | 0.220003 | 0.413136 | 0.781475 | 59  | 0.413136 | 0.586864 | 0.220003 | 0.586864 | 0.999589 | 59  | 0.586864 | 0.220003 | 0.220003 |
| mmu04918 Thyroid hormone synthesis                          | 0.428766682 | 0.180171 | 0.428767 | 0.801385 | 37  | 0.428767 | 0.571233 | 0.180171 | 0.571233 | 0.999589 | 37  | 0.571233 | 0.180171 | 0.180171 |
| mmu00500 Starch and sucrose metabolism                      | 0.435308546 | 0.165499 | 0.435309 | 0.80404  | 10  | 0.435309 | 0.564691 | 0.165499 | 0.564691 | 0.999589 | 10  | 0.564691 | 0.165499 | 0.165499 |
| mmu04390 Hippo signaling pathway                            | 0.444101163 | 0.140857 | 0.444101 | 0.809565 | 66  | 0.444101 | 0.555899 | 0.140857 | 0.555899 | 0.999589 | 66  | 0.555899 | 0.140857 | 0.140857 |
| mmu04114 Oocyte meiosis                                     | 0.448612501 | 0.129477 | 0.448613 | 0.809565 | 56  | 0.448613 | 0.551387 | 0.129477 | 0.551387 | 0.999589 | 56  | 0.551387 | 0.129477 | 0.129477 |
| mmu04012 ErbB signaling pathway                             | 0.460515295 | 0.099508 | 0.460515 | 0.809623 | 39  | 0.460515 | 0.539485 | 0.099508 | 0.539485 | 0.999589 | 39  | 0.539485 | 0.099508 | 0.099508 |
| mmu03040 Spliceosome                                        | 0.462807262 | 0.093557 | 0.462807 | 0.809623 | 67  | 0.462807 | 0.537193 | 0.093557 | 0.537193 | 0.999589 | 67  | 0.537193 | 0.093557 | 0.093557 |
| mmu00062 Fatty acid elongation                              | 0.472139127 | 0.070649 | 0.472139 | 0.809623 | 13  | 0.472139 | 0.527861 | 0.070649 | 0.527861 | 0.999589 | 13  | 0.527861 | 0.070649 | 0.070649 |
| mmu04962 Vasopressin-regulated water reabsorption           | 0.477402774 | 0.056939 | 0.477403 | 0.809623 | 28  | 0.477403 | 0.522597 | 0.056939 | 0.522597 | 0.999589 | 28  | 0.522597 | 0.056939 | 0.056939 |
| mmu04210 Apoptosis                                          | 0.484198769 | 0.039746 | 0.484199 | 0.809623 | 42  | 0.484199 | 0.515801 | 0.039746 | 0.515801 | 0.999589 | 42  | 0.515801 | 0.039746 | 0.039746 |
| mmu04916 Melanogenesis                                      | 0.485233151 | 0.037165 | 0.485233 | 0.809623 | 40  | 0.485233 | 0.514767 | 0.037165 | 0.514767 | 0.999589 | 40  | 0.514767 | 0.037165 | 0.037165 |
| mmu04978 Mineral absorption                                 | 0.485293498 | 0.037064 | 0.485293 | 0.809623 | 30  | 0.485293 | 0.514707 | 0.037064 | 0.514707 | 0.999589 | 30  | 0.514707 | 0.037064 | 0.037064 |
| mmu00630 Glyoxylate and dicarboxylate metabolism            | 0.492785904 | 0.018279 | 0.492786 | 0.809623 | 14  | 0.492786 | 0.507214 | 0.018279 | 0.507214 | 0.999589 | 14  | 0.507214 | 0.018279 | 0.018279 |
| mmu04330 Notch signaling pathway                            | 0.495100303 | 0.012359 | 0.4951   | 0.809623 | 28  | 0.4951   | 0.5049   | 0.012359 | 0.5049   | 0.999589 | 28  | 0.5049   | 0.012359 | 0.012359 |
| mmu04973 Carbohydrate digestion and absorption              | 0.50183242  | -0.00465 | 0.501832 | 0.809623 | 14  | 0.501832 | 0.498168 | -0.00465 | 0.498168 | 0.999589 | 14  | 0.498168 | -0.00465 | -0.00465 |
| mmu00900 Terpenoid backbone biosynthesis                    | 0.510708781 | -0.02717 | 0.510709 | 0.809623 | 14  | 0.510709 | 0.489291 | -0.02717 | 0.489291 | 0.999589 | 14  | 0.489291 | -0.02717 | -0.02717 |

Supplemental Table 6

|                                                             |             |          |          |          |    |          |          |          |          |          |    |          |          |          |
|-------------------------------------------------------------|-------------|----------|----------|----------|----|----------|----------|----------|----------|----------|----|----------|----------|----------|
| mmu00190 Oxidative phosphorylation                          | 0.515532382 | -0.03902 | 0.515532 | 0.809623 | 80 | 0.515532 | 0.484468 | -0.03902 | 0.484468 | 0.999589 | 80 | 0.484468 | -0.03902 | -0.03902 |
| mmu04650 Natural killer cell mediated cytotoxicity          | 0.518767368 | -0.04722 | 0.518767 | 0.809623 | 39 | 0.518767 | 0.481233 | -0.04722 | 0.481233 | 0.999589 | 39 | 0.481233 | -0.04722 | -0.04722 |
| mmu02010 ABC transporters                                   | 0.525796499 | -0.0653  | 0.525796 | 0.809623 | 16 | 0.525796 | 0.474204 | -0.0653  | 0.474204 | 0.999589 | 16 | 0.474204 | -0.0653  | -0.0653  |
| mmu00310 Lysine degradation                                 | 0.528066414 | -0.07108 | 0.528066 | 0.809623 | 21 | 0.528066 | 0.471934 | -0.07108 | 0.471934 | 0.999589 | 21 | 0.471934 | -0.07108 | -0.07108 |
| mmu00030 Pentose phosphate pathway                          | 0.541693735 | -0.10573 | 0.541694 | 0.809623 | 15 | 0.541694 | 0.458306 | -0.10573 | 0.458306 | 0.999589 | 15 | 0.458306 | -0.10573 | -0.10573 |
| mmu03008 Ribosome biogenesis in eukaryotes                  | 0.542520805 | -0.10733 | 0.542521 | 0.809623 | 34 | 0.542521 | 0.457479 | -0.10733 | 0.457479 | 0.999589 | 34 | 0.457479 | -0.10733 | -0.10733 |
| mmu04064 NF-kappa B signaling pathway                       | 0.544062455 | -0.11112 | 0.544062 | 0.809623 | 35 | 0.544062 | 0.455938 | -0.11112 | 0.455938 | 0.999589 | 35 | 0.455938 | -0.11112 | -0.11112 |
| mmu00565 Ether lipid metabolism                             | 0.546624297 | -0.11833 | 0.546624 | 0.809623 | 14 | 0.546624 | 0.453376 | -0.11833 | 0.453376 | 0.999589 | 14 | 0.453376 | -0.11833 | -0.11833 |
| mmu04140 Regulation of autophagy                            | 0.579597548 | -0.20382 | 0.579598 | 0.83459  | 16 | 0.579598 | 0.420402 | -0.20382 | 0.420402 | 0.999589 | 16 | 0.420402 | -0.20382 | -0.20382 |
| mmu04961 Endocrine and other factor-regulated calcium reabs | 0.585672504 | -0.21777 | 0.585673 | 0.83459  | 27 | 0.585673 | 0.414327 | -0.21777 | 0.414327 | 0.999589 | 27 | 0.414327 | -0.21777 | -0.21777 |
| mmu00480 Glutathione metabolism                             | 0.596915812 | -0.24651 | 0.596916 | 0.83459  | 30 | 0.596916 | 0.403084 | -0.24651 | 0.403084 | 0.999589 | 30 | 0.403084 | -0.24651 | -0.24651 |
| mmu00071 Fatty acid degradation                             | 0.609282186 | -0.27955 | 0.609282 | 0.83459  | 20 | 0.609282 | 0.390718 | -0.27955 | 0.390718 | 0.999589 | 20 | 0.390718 | -0.27955 | -0.27955 |
| mmu00982 Drug metabolism - cytochrome P450                  | 0.611146736 | -0.28462 | 0.611147 | 0.83459  | 18 | 0.611147 | 0.388853 | -0.28462 | 0.388853 | 0.999589 | 18 | 0.388853 | -0.28462 | -0.28462 |
| mmu04370 VEGF signaling pathway                             | 0.612927085 | -0.28858 | 0.612927 | 0.83459  | 33 | 0.612927 | 0.387073 | -0.28858 | 0.387073 | 0.999589 | 33 | 0.387073 | -0.28858 | -0.28858 |
| mmu00590 Arachidonic acid metabolism                        | 0.621323768 | -0.31153 | 0.621324 | 0.83459  | 18 | 0.621324 | 0.378676 | -0.31153 | 0.378676 | 0.999589 | 18 | 0.378676 | -0.31153 | -0.31153 |
| mmu03430 Mismatch repair                                    | 0.621690628 | -0.31372 | 0.621691 | 0.83459  | 14 | 0.621691 | 0.378309 | -0.31372 | 0.378309 | 0.999589 | 14 | 0.378309 | -0.31372 | -0.31372 |
| mmu03420 Nucleotide excision repair                         | 0.624396576 | -0.31905 | 0.624397 | 0.83459  | 30 | 0.624397 | 0.375603 | -0.31905 | 0.375603 | 0.999589 | 30 | 0.375603 | -0.31905 | -0.31905 |
| mmu03410 Base excision repair                               | 0.630547211 | -0.33643 | 0.630547 | 0.83459  | 18 | 0.630547 | 0.369453 | -0.33643 | 0.369453 | 0.999589 | 18 | 0.369453 | -0.33643 | -0.33643 |
| mmu04350 TGF-beta signaling pathway                         | 0.636829411 | -0.35126 | 0.636829 | 0.83459  | 41 | 0.636829 | 0.363171 | -0.35126 | 0.363171 | 0.999589 | 41 | 0.363171 | -0.35126 | -0.35126 |
| mmu04913 Ovarian steroidogenesis                            | 0.638255896 | -0.35721 | 0.638256 | 0.83459  | 17 | 0.638256 | 0.361744 | -0.35721 | 0.361744 | 0.999589 | 17 | 0.361744 | -0.35721 | -0.35721 |
| mmu04540 Gap junction                                       | 0.638902874 | -0.35709 | 0.638903 | 0.83459  | 41 | 0.638903 | 0.361097 | -0.35709 | 0.361097 | 0.999589 | 41 | 0.361097 | -0.35709 | -0.35709 |
| mmu00561 Glycerolipid metabolism                            | 0.639765076 | -0.35982 | 0.639765 | 0.83459  | 28 | 0.639765 | 0.360235 | -0.35982 | 0.360235 | 0.999589 | 28 | 0.360235 | -0.35982 | -0.35982 |
| mmu04710 Circadian rhythm                                   | 0.643218928 | -0.37079 | 0.643219 | 0.83459  | 17 | 0.643219 | 0.356781 | -0.37079 | 0.356781 | 0.999589 | 17 | 0.356781 | -0.37079 | -0.37079 |
| mmu04146 Peroxisome                                         | 0.65778372  | -0.40839 | 0.657784 | 0.841482 | 45 | 0.657784 | 0.342216 | -0.40839 | 0.342216 | 0.999589 | 45 | 0.342216 | -0.40839 | -0.40839 |
| mmu04310 Wnt signaling pathway                              | 0.659250468 | -0.41158 | 0.65925  | 0.841482 | 65 | 0.65925  | 0.34075  | -0.41158 | 0.34075  | 0.999589 | 65 | 0.34075  | -0.41158 | -0.41158 |
| mmu03440 Homologous recombination                           | 0.676016782 | -0.463   | 0.676017 | 0.844071 | 14 | 0.676017 | 0.323983 | -0.463   | 0.323983 | 0.999589 | 14 | 0.323983 | -0.463   | -0.463   |
| mmu00640 Propanoate metabolism                              | 0.679147499 | -0.47182 | 0.679147 | 0.844071 | 12 | 0.679147 | 0.320853 | -0.47182 | 0.320853 | 0.999589 | 12 | 0.320853 | -0.47182 | -0.47182 |
| mmu03013 RNA transport                                      | 0.682058828 | -0.47435 | 0.682059 | 0.844071 | 94 | 0.682059 | 0.317941 | -0.47435 | 0.317941 | 0.999589 | 94 | 0.317941 | -0.47435 | -0.47435 |
| mmu04726 Serotonergic synapse                               | 0.684640312 | -0.48297 | 0.68464  | 0.844071 | 38 | 0.68464  | 0.31536  | -0.48297 | 0.31536  | 0.999589 | 38 | 0.31536  | -0.48297 | -0.48297 |
| mmu00534 Glycosaminoglycan biosynthesis - heparan sulfate / | 0.688159729 | -0.49685 | 0.68816  | 0.844071 | 16 | 0.68816  | 0.31184  | -0.49685 | 0.31184  | 0.999589 | 16 | 0.31184  | -0.49685 | -0.49685 |
| mmu04971 Gastric acid secretion                             | 0.702384775 | -0.53405 | 0.702385 | 0.85083  | 33 | 0.702385 | 0.297615 | -0.53405 | 0.297615 | 0.999589 | 33 | 0.297615 | -0.53405 | -0.53405 |
| mmu00140 Steroid hormone biosynthesis                       | 0.707824013 | -0.55361 | 0.707824 | 0.85083  | 16 | 0.707824 | 0.292176 | -0.55361 | 0.292176 | 0.999589 | 16 | 0.292176 | -0.55361 | -0.55361 |
| mmu04960 Aldosterone-regulated sodium reabsorption          | 0.709928041 | -0.55754 | 0.709928 | 0.85083  | 22 | 0.709928 | 0.290072 | -0.55754 | 0.290072 | 0.999589 | 22 | 0.290072 | -0.55754 | -0.55754 |
| mmu04340 Hedgehog signaling pathway                         | 0.717712311 | -0.58176 | 0.717712 | 0.853643 | 19 | 0.717712 | 0.282288 | -0.58176 | 0.282288 | 0.999589 | 19 | 0.282288 | -0.58176 | -0.58176 |
| mmu03030 DNA replication                                    | 0.725652321 | -0.60583 | 0.725652 | 0.856597 | 22 | 0.725652 | 0.274348 | -0.60583 | 0.274348 | 0.999589 | 22 | 0.274348 | -0.60583 | -0.60583 |
| mmu04974 Protein digestion and absorption                   | 0.735217911 | -0.63206 | 0.735218 | 0.860348 | 36 | 0.735218 | 0.264782 | -0.63206 | 0.264782 | 0.999589 | 36 | 0.264782 | -0.63206 | -0.63206 |
| mmu03022 Basal transcription factors                        | 0.739789555 | -0.64927 | 0.73979  | 0.860348 | 20 | 0.73979  | 0.26021  | -0.64927 | 0.26021  | 0.999589 | 20 | 0.26021  | -0.64927 | -0.64927 |
| mmu04975 Fat digestion and absorption                       | 0.76095654  | -0.72256 | 0.760957 | 0.871003 | 13 | 0.760957 | 0.239043 | -0.72256 | 0.239043 | 0.999589 | 13 | 0.239043 | -0.72256 | -0.72256 |
| mmu00020 Citrate cycle (TCA cycle)                          | 0.764809063 | -0.73375 | 0.764809 | 0.871003 | 17 | 0.764809 | 0.235191 | -0.73375 | 0.235191 | 0.999589 | 17 | 0.235191 | -0.73375 | -0.73375 |
| mmu04723 Retrograde endocannabinoid signaling               | 0.775519088 | -0.76171 | 0.775519 | 0.871003 | 43 | 0.775519 | 0.224481 | -0.76171 | 0.224481 | 0.999589 | 43 | 0.224481 | -0.76171 | -0.76171 |
| mmu03015 mRNA surveillance pathway                          | 0.775842298 | -0.76128 | 0.775842 | 0.871003 | 51 | 0.775842 | 0.224158 | -0.76128 | 0.224158 | 0.999589 | 51 | 0.224158 | -0.76128 | -0.76128 |
| mmu04724 Glutamatergic synapse                              | 0.782053864 | -0.78422 | 0.782054 | 0.871003 | 42 | 0.782054 | 0.217946 | -0.78422 | 0.217946 | 0.999589 | 42 | 0.217946 | -0.78422 | -0.78422 |
| mmu04910 Insulin signaling pathway                          | 0.782237993 | -0.7821  | 0.782238 | 0.871003 | 70 | 0.782238 | 0.217762 | -0.7821  | 0.217762 | 0.999589 | 70 | 0.217762 | -0.7821  | -0.7821  |
| mmu04742 Taste transduction                                 | 0.807165855 | -0.88798 | 0.807166 | 0.891013 | 11 | 0.807166 | 0.192834 | -0.88798 | 0.192834 | 0.999589 | 11 | 0.192834 | -0.88798 | -0.88798 |
| mmu03460 Fanconi anemia pathway                             | 0.811560011 | -0.89652 | 0.81156  | 0.891013 | 19 | 0.81156  | 0.18844  | -0.89652 | 0.18844  | 0.999589 | 19 | 0.18844  | -0.89652 | -0.89652 |
| mmu00860 Porphyrin and chlorophyll metabolism               | 0.82817369  | -0.9678  | 0.828174 | 0.902939 | 15 | 0.828174 | 0.171826 | -0.9678  | 0.171826 | 0.999589 | 15 | 0.171826 | -0.9678  | -0.9678  |
| mmu04727 GABAergic synapse                                  | 0.843070935 | -1.01475 | 0.843071 | 0.912842 | 35 | 0.843071 | 0.156929 | -1.01475 | 0.156929 | 0.999589 | 35 | 0.156929 | -1.01475 | -1.01475 |
| mmu04120 Ubiquitin mediated proteolysis                     | 0.85048048  | -1.04229 | 0.85048  | 0.914558 | 79 | 0.85048  | 0.14952  | -1.04229 | 0.14952  | 0.999589 | 79 | 0.14952  | -1.04229 | -1.04229 |
| mmu00280 Valine, leucine and isoleucine degradation         | 0.86361229  | -1.1098  | 0.863612 | 0.918899 | 27 | 0.863612 | 0.136388 | -1.1098  | 0.136388 | 0.999589 | 27 | 0.136388 | -1.1098  | -1.1098  |
| mmu04360 Axon guidance                                      | 0.876469058 | -1.16414 | 0.876469 | 0.918899 | 59 | 0.876469 | 0.123531 | -1.16414 | 0.123531 | 0.999589 | 59 | 0.123531 | -1.16414 | -1.16414 |

Supplemental Table 6

|                                 |             |          |          |          |     |          |          |          |          |          |     |          |          |          |
|---------------------------------|-------------|----------|----------|----------|-----|----------|----------|----------|----------|----------|-----|----------|----------|----------|
| mmu00230 Purine metabolism      | 0.876985831 | -1.16619 | 0.876986 | 0.918899 | 76  | 0.876986 | 0.123014 | -1.16619 | 0.123014 | 0.999589 | 76  | 0.123014 | -1.16619 | -1.16619 |
| mmu00830 Retinol metabolism     | 0.877928683 | -1.19057 | 0.877929 | 0.918899 | 16  | 0.877929 | 0.122071 | -1.19057 | 0.122071 | 0.999589 | 16  | 0.122071 | -1.19057 | -1.19057 |
| mmu04110 Cell cycle             | 0.887882832 | -1.22215 | 0.887883 | 0.923163 | 57  | 0.887883 | 0.112117 | -1.22215 | 0.112117 | 0.999589 | 57  | 0.112117 | -1.22215 | -1.22215 |
| mmu00650 Butanoate metabolism   | 0.898174699 | -1.31658 | 0.898175 | 0.92772  | 11  | 0.898175 | 0.101825 | -1.31658 | 0.101825 | 0.999589 | 11  | 0.101825 | -1.31658 | -1.31658 |
| mmu03020 RNA polymerase         | 0.904974848 | -1.36101 | 0.904975 | 0.928634 | 17  | 0.904975 | 0.095025 | -1.36101 | 0.095025 | 0.999589 | 17  | 0.095025 | -1.36101 | -1.36101 |
| mmu04740 Olfactory transduction | 0.921252129 | -1.41841 | 0.921252 | 0.939199 | 160 | 0.921252 | 0.078748 | -1.41841 | 0.078748 | 0.999589 | 160 | 0.078748 | -1.41841 | -1.41841 |
| mmu04115 p53 signaling pathway  | 0.961173752 | -1.79258 | 0.961174 | 0.973576 | 37  | 0.961174 | 0.038826 | -1.79258 | 0.038826 | 0.999589 | 37  | 0.038826 | -1.79258 | -1.79258 |
| mmu00240 Pyrimidine metabolism  | 0.972283062 | -1.94476 | 0.972283 | 0.978516 | 55  | 0.972283 | 0.027717 | -1.94476 | 0.027717 | 0.999589 | 55  | 0.027717 | -1.94476 | -1.94476 |
| mmu03010 Ribosome               | 0.999293182 | -3.27075 | 0.999293 | 0.999293 | 77  | 0.999293 | 0.000707 | -3.27075 | 0.000707 | 0.11097  | 77  | 0.000707 | -3.27075 | -3.27075 |

Supplemental Table 7

| GO_Term                                                         | greater.p.g<br>eomean | greater.st<br>at.mean | greater.p.<br>val | greater.q.<br>val | greater.se<br>t.size | greater.ex<br>p1 | less.p.geo<br>mean | less.stat.<br>mean | less.p.val | less.q.val | less.set.siz<br>e | stats.stat.<br>mean | stats.exp1<br>stats.exp1 |
|-----------------------------------------------------------------|-----------------------|-----------------------|-------------------|-------------------|----------------------|------------------|--------------------|--------------------|------------|------------|-------------------|---------------------|--------------------------|
| GO:0034976 response to endoplasmic reticulum stress             | 0.0025237             | 2.890434              | 0.002524          | 0.777781          | 60                   | 0.002524         | 0.997476           | 2.890434           | 0.997476   | 0.997476   | 60                | 0.997476            | 2.890434                 |
| GO:0016064 immunoglobulin mediated immune response              | 0.003433              | 2.802173              | 0.003433          | 0.777781          | 40                   | 0.003433         | 0.996567           | 2.802173           | 0.996567   | 0.99688    | 40                | 0.996567            | 2.802173                 |
| GO:0006090 pyruvate metabolic process                           | 0.0040044             | 2.756646              | 0.004004          | 0.777781          | 31                   | 0.004004         | 0.995996           | 2.756646           | 0.995996   | 0.996621   | 31                | 0.995996            | 2.756646                 |
| GO:0006096 glycolytic process                                   | 0.004516              | 2.737182              | 0.004516          | 0.777781          | 25                   | 0.004516         | 0.995484           | 2.737182           | 0.995484   | 0.996423   | 25                | 0.995484            | 2.737182                 |
| GO:0006952 defense response                                     | 0.0056105             | 2.544525              | 0.00561           | 0.777781          | 326                  | 0.00561          | 0.99439            | 2.544525           | 0.99439    | 0.99564    | 326               | 0.99439             | 2.544525                 |
| GO:0072376 protein activation cascade                           | 0.0060184             | 2.6794                | 0.006018          | 0.777781          | 18                   | 0.006018         | 0.993982           | 2.6794             | 0.993982   | 0.995544   | 18                | 0.993982            | 2.6794                   |
| GO:0016192 vesicle-mediated transport                           | 0.0061804             | 2.506962              | 0.00618           | 0.777781          | 433                  | 0.00618          | 0.99382            | 2.506962           | 0.99382    | 0.995544   | 433               | 0.99382             | 2.506962                 |
| GO:0061025 membrane fusion                                      | 0.0091904             | 2.399508              | 0.00919           | 0.777781          | 49                   | 0.00919          | 0.99081            | 2.399508           | 0.99081    | 0.992992   | 49                | 0.99081             | 2.399508                 |
| GO:0071456 cellular response to hypoxia                         | 0.0092977             | 2.459059              | 0.009298          | 0.777781          | 28                   | 0.009298         | 0.990702           | 2.459059           | 0.990702   | 0.992992   | 28                | 0.990702            | 2.459059                 |
| GO:0006812 cation transport                                     | 0.0096838             | 2.344132              | 0.009684          | 0.777781          | 358                  | 0.009684         | 0.990316           | 2.344132           | 0.990316   | 0.992992   | 358               | 0.990316            | 2.344132                 |
| GO:0006984 ER-nucleus signaling pathway                         | 0.0097242             | 2.446881              | 0.009724          | 0.777781          | 27                   | 0.009724         | 0.990276           | 2.446881           | 0.990276   | 0.992992   | 27                | 0.990276            | 2.446881                 |
| GO:0044724 single-organism carbohydrate catabolic process       | 0.0098164             | 2.374422              | 0.009816          | 0.777781          | 49                   | 0.009816         | 0.990184           | 2.374422           | 0.990184   | 0.992992   | 49                | 0.990184            | 2.374422                 |
| GO:0006956 complement activation                                | 0.0099052             | 2.504577              | 0.009905          | 0.777781          | 15                   | 0.009905         | 0.990095           | 2.504577           | 0.990095   | 0.992992   | 15                | 0.990095            | 2.504577                 |
| GO:0019724 B cell mediated immunity                             | 0.0100083             | 2.391687              | 0.010008          | 0.777781          | 41                   | 0.010008         | 0.989992           | 2.391687           | 0.989992   | 0.992992   | 41                | 0.989992            | 2.391687                 |
| GO:0005975 carbohydrate metabolic process                       | 0.0100128             | 2.333647              | 0.010013          | 0.777781          | 249                  | 0.010013         | 0.989987           | 2.333647           | 0.989987   | 0.992992   | 249               | 0.989987            | 2.333647                 |
| GO:0010951 negative regulation of endopeptidase activity        | 0.0101495             | 2.350027              | 0.01015           | 0.777781          | 68                   | 0.01015          | 0.98985            | 2.350027           | 0.98985    | 0.992992   | 68                | 0.98985             | 2.350027                 |
| GO:0071310 cellular response to organic substance               | 0.0101576             | 2.324544              | 0.010158          | 0.777781          | 499                  | 0.010158         | 0.989842           | 2.324544           | 0.989842   | 0.992992   | 499               | 0.989842            | 2.324544                 |
| GO:0001666 response to hypoxia                                  | 0.0102401             | 2.345693              | 0.01024           | 0.777781          | 78                   | 0.01024          | 0.98976            | 2.345693           | 0.98976    | 0.992992   | 78                | 0.98976             | 2.345693                 |
| GO:0036294 cellular response to decreased oxygen levels         | 0.0104907             | 2.404125              | 0.010491          | 0.777781          | 29                   | 0.010491         | 0.989509           | 2.404125           | 0.989509   | 0.992992   | 29                | 0.989509            | 2.404125                 |
| GO:0036293 response to decreased oxygen levels                  | 0.0111113             | 2.313377              | 0.011111          | 0.777781          | 79                   | 0.011111         | 0.988889           | 2.313377           | 0.988889   | 0.992992   | 79                | 0.988889            | 2.313377                 |
| GO:0016052 carbohydrate catabolic process                       | 0.0124922             | 2.27623               | 0.012492          | 0.777781          | 52                   | 0.012492         | 0.987508           | 2.27623            | 0.987508   | 0.992992   | 52                | 0.987508            | 2.27623                  |
| GO:0051604 protein maturation                                   | 0.0126054             | 2.251962              | 0.012605          | 0.777781          | 163                  | 0.012605         | 0.987395           | 2.251962           | 0.987395   | 0.992992   | 163               | 0.987395            | 2.251962                 |
| GO:0046916 cellular transition metal ion homeostasis            | 0.0126799             | 2.287733              | 0.01268           | 0.777781          | 35                   | 0.01268          | 0.98732            | 2.287733           | 0.98732    | 0.992992   | 35                | 0.98732             | 2.287733                 |
| GO:0009607 response to biotic stimulus                          | 0.0127686             | 2.242955              | 0.012769          | 0.777781          | 199                  | 0.012769         | 0.987231           | 2.242955           | 0.987231   | 0.992992   | 199               | 0.987231            | 2.242955                 |
| GO:0031329 regulation of cellular catabolic process             | 0.0137214             | 2.211188              | 0.013721          | 0.777781          | 290                  | 0.013721         | 0.986279           | 2.211188           | 0.986279   | 0.992992   | 290               | 0.986279            | 2.211188                 |
| GO:0002526 acute inflammatory response                          | 0.0150597             | 2.231297              | 0.01506           | 0.777781          | 33                   | 0.01506          | 0.98494            | 2.231297           | 0.98494    | 0.992733   | 33                | 0.98494             | 2.231297                 |
| GO:0019216 regulation of lipid metabolic process                | 0.0155835             | 2.1693                | 0.015584          | 0.777781          | 109                  | 0.015584         | 0.984416           | 2.1693             | 0.984416   | 0.992519   | 109               | 0.984416            | 2.1693                   |
| GO:0006954 inflammatory response                                | 0.0165115             | 2.142797              | 0.016511          | 0.777781          | 164                  | 0.016511         | 0.983489           | 2.142797           | 0.983489   | 0.991897   | 164               | 0.983489            | 2.142797                 |
| GO:0071216 cellular response to biotic stimulus                 | 0.0167226             | 2.161325              | 0.016723          | 0.777781          | 51                   | 0.016723         | 0.983277           | 2.161325           | 0.983277   | 0.991897   | 51                | 0.983277            | 2.161325                 |
| GO:0071219 cellular response to molecule of bacterial origin    | 0.0168571             | 2.160561              | 0.016857          | 0.777781          | 42                   | 0.016857         | 0.983143           | 2.160561           | 0.983143   | 0.991897   | 42                | 0.983143            | 2.160561                 |
| GO:0016485 protein processing                                   | 0.0172863             | 2.125939              | 0.017286          | 0.777781          | 153                  | 0.017286         | 0.982714           | 2.125939           | 0.982714   | 0.991897   | 153               | 0.982714            | 2.125939                 |
| GO:0043436 oxoacid metabolic process                            | 0.0174438             | 2.113609              | 0.017444          | 0.777781          | 370                  | 0.017444         | 0.982556           | 2.113609           | 0.982556   | 0.991897   | 370               | 0.982556            | 2.113609                 |
| GO:0071222 cellular response to lipopolysaccharide              | 0.0175062             | 2.149496              | 0.017506          | 0.777781          | 37                   | 0.017506         | 0.982494           | 2.149496           | 0.982494   | 0.991897   | 37                | 0.982494            | 2.149496                 |
| GO:0002684 positive regulation of immune system process         | 0.0176167             | 2.113481              | 0.017617          | 0.777781          | 204                  | 0.017617         | 0.982383           | 2.113481           | 0.982383   | 0.991897   | 204               | 0.982383            | 2.113481                 |
| GO:0072511 divalent inorganic cation transport                  | 0.0183072             | 2.100903              | 0.018307          | 0.777781          | 143                  | 0.018307         | 0.981693           | 2.100903           | 0.981693   | 0.991897   | 143               | 0.981693            | 2.100903                 |
| GO:0006909 phagocytosis                                         | 0.0194822             | 2.094026              | 0.019482          | 0.777781          | 48                   | 0.019482         | 0.980518           | 2.094026           | 0.980518   | 0.991412   | 48                | 0.980518            | 2.094026                 |
| GO:0043207 response to external biotic stimulus                 | 0.0199354             | 2.063128              | 0.019935          | 0.777781          | 186                  | 0.019935         | 0.980065           | 2.063128           | 0.980065   | 0.991269   | 186               | 0.980065            | 2.063128                 |
| GO:0051707 response to other organism                           | 0.0199354             | 2.063128              | 0.019935          | 0.777781          | 186                  | 0.019935         | 0.980065           | 2.063128           | 0.980065   | 0.991269   | 186               | 0.980065            | 2.063128                 |
| GO:0019752 carboxylic acid metabolic process                    | 0.0202908             | 2.051662              | 0.020291          | 0.777781          | 350                  | 0.020291         | 0.979709           | 2.051662           | 0.979709   | 0.991269   | 350               | 0.979709            | 2.051662                 |
| GO:0009896 positive regulation of catabolic process             | 0.0203322             | 2.061774              | 0.020332          | 0.777781          | 104                  | 0.020332         | 0.979668           | 2.061774           | 0.979668   | 0.991269   | 104               | 0.979668            | 2.061774                 |
| GO:0050778 positive regulation of immune response               | 0.0203863             | 2.059642              | 0.020386          | 0.777781          | 111                  | 0.020386         | 0.979614           | 2.059642           | 0.979614   | 0.991269   | 111               | 0.979614            | 2.059642                 |
| GO:0030968 endoplasmic reticulum unfolded protein response      | 0.020463              | 2.181132              | 0.020463          | 0.777781          | 17                   | 0.020463         | 0.979537           | 2.181132           | 0.979537   | 0.991269   | 17                | 0.979537            | 2.181132                 |
| GO:0034620 cellular response to unfolded protein                | 0.020463              | 2.181132              | 0.020463          | 0.777781          | 17                   | 0.020463         | 0.979537           | 2.181132           | 0.979537   | 0.991269   | 17                | 0.979537            | 2.181132                 |
| GO:0035967 cellular response to topologically incorrect protein | 0.0205358             | 2.153315              | 0.020536          | 0.777781          | 20                   | 0.020536         | 0.979464           | 2.153315           | 0.979464   | 0.991269   | 20                | 0.979464            | 2.153315                 |
| GO:0044723 single-organism carbohydrate metabolic process       | 0.0207828             | 2.043909              | 0.020783          | 0.777781          | 221                  | 0.020783         | 0.979217           | 2.043909           | 0.979217   | 0.991269   | 221               | 0.979217            | 2.043909                 |
| GO:0031668 cellular response to extracellular stimulus          | 0.0208462             | 2.05718               | 0.020846          | 0.777781          | 73                   | 0.020846         | 0.979154           | 2.05718            | 0.979154   | 0.991269   | 73                | 0.979154            | 2.05718                  |
| GO:0009894 regulation of catabolic process                      | 0.0216345             | 2.025163              | 0.021634          | 0.777781          | 334                  | 0.021634         | 0.978366           | 2.025163           | 0.978366   | 0.991269   | 334               | 0.978366            | 2.025163                 |
| GO:0006888 ER to Golgi vesicle-mediated transport               | 0.0218374             | 2.055278              | 0.021837          | 0.777781          | 36                   | 0.021837         | 0.978163           | 2.055278           | 0.978163   | 0.991269   | 36                | 0.978163            | 2.055278                 |

Supplemental Table 7

|                                                                      |           |          |          |          |     |          |          |          |          |          |     |          |          |          |
|----------------------------------------------------------------------|-----------|----------|----------|----------|-----|----------|----------|----------|----------|----------|-----|----------|----------|----------|
| GO:0070838 divalent metal ion transport                              | 0.0221229 | 2.022185 | 0.022123 | 0.777781 | 136 | 0.022123 | 0.977877 | 2.022185 | 0.977877 | 0.991269 | 136 | 0.977877 | 2.022185 | 2.022185 |
| GO:0015909 long-chain fatty acid transport                           | 0.0222575 | 2.094948 | 0.022257 | 0.777781 | 17  | 0.022257 | 0.977743 | 2.094948 | 0.977743 | 0.991269 | 17  | 0.977743 | 2.094948 | 2.094948 |
| GO:0050900 leukocyte migration                                       | 0.0225852 | 2.01978  | 0.022585 | 0.777781 | 85  | 0.022585 | 0.977415 | 2.01978  | 0.977415 | 0.991269 | 85  | 0.977415 | 2.01978  | 2.01978  |
| GO:0070482 response to oxygen levels                                 | 0.0229675 | 2.014285 | 0.022968 | 0.777781 | 82  | 0.022968 | 0.977032 | 2.014285 | 0.977032 | 0.991269 | 82  | 0.977032 | 2.014285 | 2.014285 |
| GO:0006897 endocytosis                                               | 0.0230251 | 2.001708 | 0.023025 | 0.777781 | 187 | 0.023025 | 0.976975 | 2.001708 | 0.976975 | 0.991269 | 187 | 0.976975 | 2.001708 | 2.001708 |
| GO:0031331 positive regulation of cellular catabolic process         | 0.0233622 | 2.007945 | 0.023362 | 0.777781 | 77  | 0.023362 | 0.976638 | 2.007945 | 0.976638 | 0.991269 | 77  | 0.976638 | 2.007945 | 2.007945 |
| GO:0071496 cellular response to external stimulus                    | 0.0239199 | 1.995035 | 0.02392  | 0.777781 | 84  | 0.02392  | 0.97608  | 1.995035 | 0.97608  | 0.991269 | 84  | 0.97608  | 1.995035 | 1.995035 |
| GO:0006082 organic acid metabolic process                            | 0.0240038 | 1.980581 | 0.024004 | 0.777781 | 376 | 0.024004 | 0.975996 | 1.980581 | 0.975996 | 0.991269 | 376 | 0.975996 | 1.980581 | 1.980581 |
| GO:0043266 regulation of potassium ion transport                     | 0.024197  | 2.018775 | 0.024197 | 0.777781 | 34  | 0.024197 | 0.975803 | 2.018775 | 0.975803 | 0.991269 | 34  | 0.975803 | 2.018775 | 2.018775 |
| GO:0048002 antigen processing and presentation of peptide antigen    | 0.0247195 | 2.022233 | 0.024719 | 0.777781 | 27  | 0.024719 | 0.975281 | 2.022233 | 0.975281 | 0.991269 | 27  | 0.975281 | 2.022233 | 2.022233 |
| GO:0007517 muscle organ development                                  | 0.0247233 | 1.976351 | 0.024723 | 0.777781 | 132 | 0.024723 | 0.975277 | 1.976351 | 0.975277 | 0.991269 | 132 | 0.975277 | 1.976351 | 1.976351 |
| GO:0070972 protein localization to endoplasmic reticulum             | 0.0255664 | 2.029805 | 0.025566 | 0.777781 | 18  | 0.025566 | 0.974434 | 2.029805 | 0.974434 | 0.991269 | 18  | 0.974434 | 2.029805 | 2.029805 |
| GO:0009991 response to extracellular stimulus                        | 0.0263557 | 1.951177 | 0.026356 | 0.777781 | 106 | 0.026356 | 0.973644 | 1.951177 | 0.973644 | 0.991269 | 106 | 0.973644 | 1.951177 | 1.951177 |
| GO:0002455 humoral immune response mediated by circulating immu      | 0.027501  | 2.012282 | 0.027501 | 0.777781 | 17  | 0.027501 | 0.972499 | 2.012282 | 0.972499 | 0.991269 | 17  | 0.972499 | 2.012282 | 2.012282 |
| GO:0071453 cellular response to oxygen levels                        | 0.0276111 | 1.972735 | 0.027611 | 0.777781 | 31  | 0.027611 | 0.972389 | 1.972735 | 0.972389 | 0.991269 | 31  | 0.972389 | 1.972735 | 1.972735 |
| GO:0048146 positive regulation of fibroblast proliferation           | 0.0278097 | 1.978619 | 0.02781  | 0.777781 | 21  | 0.02781  | 0.97219  | 1.978619 | 0.97219  | 0.991269 | 21  | 0.97219  | 1.978619 | 1.978619 |
| GO:0044801 single-organism membrane fusion                           | 0.0281736 | 1.939768 | 0.028174 | 0.777781 | 37  | 0.028174 | 0.971826 | 1.939768 | 0.971826 | 0.991269 | 37  | 0.971826 | 1.939768 | 1.939768 |
| GO:0050766 positive regulation of phagocytosis                       | 0.0282496 | 1.96735  | 0.02825  | 0.777781 | 20  | 0.02825  | 0.97175  | 1.96735  | 0.97175  | 0.991269 | 20  | 0.97175  | 1.96735  | 1.96735  |
| GO:0070613 regulation of protein processing                          | 0.0283981 | 1.926593 | 0.028398 | 0.777781 | 78  | 0.028398 | 0.971602 | 1.926593 | 0.971602 | 0.991269 | 78  | 0.971602 | 1.926593 | 1.926593 |
| GO:1903317 regulation of protein maturation                          | 0.0283981 | 1.926593 | 0.028398 | 0.777781 | 78  | 0.028398 | 0.971602 | 1.926593 | 0.971602 | 0.991269 | 78  | 0.971602 | 1.926593 | 1.926593 |
| GO:0006886 intracellular protein transport                           | 0.028801  | 1.902045 | 0.028801 | 0.777781 | 330 | 0.028801 | 0.971199 | 1.902045 | 0.971199 | 0.991269 | 330 | 0.971199 | 1.902045 | 1.902045 |
| GO:0061061 muscle structure development                              | 0.0289234 | 1.902563 | 0.028923 | 0.777781 | 217 | 0.028923 | 0.971077 | 1.902563 | 0.971077 | 0.991269 | 217 | 0.971077 | 1.902563 | 1.902563 |
| GO:0060538 skeletal muscle organ development                         | 0.0289789 | 1.916802 | 0.028979 | 0.777781 | 75  | 0.028979 | 0.971021 | 1.916802 | 0.971021 | 0.991269 | 75  | 0.971021 | 1.916802 | 1.916802 |
| GO:0031589 cell-substrate adhesion                                   | 0.0290053 | 1.906296 | 0.029005 | 0.777781 | 106 | 0.029005 | 0.970995 | 1.906296 | 0.970995 | 0.991269 | 106 | 0.970995 | 1.906296 | 1.906296 |
| GO:0006826 iron ion transport                                        | 0.0290971 | 1.968659 | 0.029097 | 0.777781 | 17  | 0.029097 | 0.970903 | 1.968659 | 0.970903 | 0.991269 | 17  | 0.970903 | 1.968659 | 1.968659 |
| GO:0070661 leukocyte proliferation                                   | 0.029784  | 1.896745 | 0.029784 | 0.777781 | 97  | 0.029784 | 0.970216 | 1.896745 | 0.970216 | 0.991269 | 97  | 0.970216 | 1.896745 | 1.896745 |
| GO:0035914 skeletal muscle cell differentiation                      | 0.0298817 | 1.939662 | 0.029882 | 0.777781 | 29  | 0.029882 | 0.970118 | 1.939662 | 0.970118 | 0.991269 | 29  | 0.970118 | 1.939662 | 1.939662 |
| GO:0030162 regulation of proteolysis                                 | 0.0300868 | 1.884819 | 0.030087 | 0.777781 | 219 | 0.030087 | 0.969913 | 1.884819 | 0.969913 | 0.991269 | 219 | 0.969913 | 1.884819 | 1.884819 |
| GO:1901216 positive regulation of neuron death                       | 0.0305828 | 1.910632 | 0.030583 | 0.777781 | 39  | 0.030583 | 0.969417 | 1.910632 | 0.969417 | 0.991269 | 39  | 0.969417 | 1.910632 | 1.910632 |
| GO:0034105 positive regulation of tissue remodeling                  | 0.030658  | 1.962912 | 0.030658 | 0.777781 | 14  | 0.030658 | 0.969342 | 1.962912 | 0.969342 | 0.991269 | 14  | 0.969342 | 1.962912 | 1.962912 |
| GO:0007519 skeletal muscle tissue development                        | 0.0308965 | 1.888128 | 0.030896 | 0.777781 | 74  | 0.030896 | 0.969104 | 1.888128 | 0.969104 | 0.991269 | 74  | 0.969104 | 1.888128 | 1.888128 |
| GO:0010498 proteasomal protein catabolic process                     | 0.0311182 | 1.875014 | 0.031118 | 0.777781 | 119 | 0.031118 | 0.968882 | 1.875014 | 0.968882 | 0.991269 | 119 | 0.968882 | 1.875014 | 1.875014 |
| GO:0007030 Golgi organization                                        | 0.031181  | 1.903631 | 0.031181 | 0.777781 | 32  | 0.031181 | 0.968819 | 1.903631 | 0.968819 | 0.991269 | 32  | 0.968819 | 1.903631 | 1.903631 |
| GO:0002685 regulation of leukocyte migration                         | 0.0315523 | 1.885203 | 0.031552 | 0.777781 | 50  | 0.031552 | 0.968448 | 1.885203 | 0.968448 | 0.991269 | 50  | 0.968448 | 1.885203 | 1.885203 |
| GO:0006816 calcium ion transport                                     | 0.0317132 | 1.865209 | 0.031713 | 0.777781 | 129 | 0.031713 | 0.968287 | 1.865209 | 0.968287 | 0.991269 | 129 | 0.968287 | 1.865209 | 1.865209 |
| GO:0002687 positive regulation of leukocyte migration                | 0.0318002 | 1.887931 | 0.0318   | 0.777781 | 42  | 0.0318   | 0.9682   | 1.887931 | 0.9682   | 0.991269 | 42  | 0.9682   | 1.887931 | 1.887931 |
| GO:0006906 vesicle fusion                                            | 0.0322653 | 1.894294 | 0.032265 | 0.777781 | 24  | 0.032265 | 0.967735 | 1.894294 | 0.967735 | 0.991269 | 24  | 0.967735 | 1.894294 | 1.894294 |
| GO:0002573 myeloid leukocyte differentiation                         | 0.0324288 | 1.867488 | 0.032429 | 0.777781 | 65  | 0.032429 | 0.967571 | 1.867488 | 0.967571 | 0.991269 | 65  | 0.967571 | 1.867488 | 1.867488 |
| GO:0070059 intrinsic apoptotic signaling pathway in response to endo | 0.0326882 | 1.944523 | 0.032688 | 0.777781 | 20  | 0.032688 | 0.967312 | 1.944523 | 0.967312 | 0.991269 | 20  | 0.967312 | 1.944523 | 1.944523 |
| GO:0010942 positive regulation of cell death                         | 0.033103  | 1.842837 | 0.033103 | 0.777781 | 204 | 0.033103 | 0.966897 | 1.842837 | 0.966897 | 0.991269 | 204 | 0.966897 | 1.842837 | 1.842837 |
| GO:0045807 positive regulation of endocytosis                        | 0.0333531 | 1.858419 | 0.033353 | 0.777781 | 42  | 0.033353 | 0.966647 | 1.858419 | 0.966647 | 0.991269 | 42  | 0.966647 | 1.858419 | 1.858419 |
| GO:1903034 regulation of response to wounding                        | 0.0336818 | 1.838096 | 0.033682 | 0.777781 | 130 | 0.033682 | 0.966318 | 1.838096 | 0.966318 | 0.991269 | 130 | 0.966318 | 1.838096 | 1.838096 |
| GO:0043065 positive regulation of apoptotic process                  | 0.0339614 | 1.831725 | 0.033961 | 0.777781 | 189 | 0.033961 | 0.966039 | 1.831725 | 0.966039 | 0.991269 | 189 | 0.966039 | 1.831725 | 1.831725 |
| GO:0032943 mononuclear cell proliferation                            | 0.0339775 | 1.837395 | 0.033978 | 0.777781 | 95  | 0.033978 | 0.966022 | 1.837395 | 0.966022 | 0.991269 | 95  | 0.966022 | 1.837395 | 1.837395 |
| GO:0046651 lymphocyte proliferation                                  | 0.0339775 | 1.837395 | 0.033978 | 0.777781 | 95  | 0.033978 | 0.966022 | 1.837395 | 0.966022 | 0.991269 | 95  | 0.966022 | 1.837395 | 1.837395 |
| GO:1902107 positive regulation of leukocyte differentiation          | 0.0340523 | 1.855354 | 0.034052 | 0.777781 | 45  | 0.034052 | 0.965948 | 1.855354 | 0.965948 | 0.991269 | 45  | 0.965948 | 1.855354 | 1.855354 |
| GO:0048145 regulation of fibroblast proliferation                    | 0.034568  | 1.845113 | 0.034568 | 0.777781 | 38  | 0.034568 | 0.965432 | 1.845113 | 0.965432 | 0.991269 | 38  | 0.965432 | 1.845113 | 1.845113 |
| GO:0071621 granulocyte chemotaxis                                    | 0.0346846 | 1.864605 | 0.034685 | 0.777781 | 30  | 0.034685 | 0.965315 | 1.864605 | 0.965315 | 0.991269 | 30  | 0.965315 | 1.864605 | 1.864605 |
| GO:0006811 ion transport                                             | 0.034942  | 1.814786 | 0.034942 | 0.777781 | 485 | 0.034942 | 0.965058 | 1.814786 | 0.965058 | 0.991269 | 485 | 0.965058 | 1.814786 | 1.814786 |
| GO:0030001 metal ion transport                                       | 0.0352191 | 1.812837 | 0.035219 | 0.777781 | 272 | 0.035219 | 0.964781 | 1.812837 | 0.964781 | 0.991269 | 272 | 0.964781 | 1.812837 | 1.812837 |

Supplemental Table 7

|                                                                       |           |          |          |          |     |          |          |          |          |          |     |          |          |          |
|-----------------------------------------------------------------------|-----------|----------|----------|----------|-----|----------|----------|----------|----------|----------|-----|----------|----------|----------|
| GO:0097530 granulocyte migration                                      | 0.0356199 | 1.849726 | 0.03562  | 0.777781 | 31  | 0.03562  | 0.96438  | 1.849726 | 0.96438  | 0.991269 | 31  | 0.96438  | 1.849726 | 1.849726 |
| GO:0032642 regulation of chemokine production                         | 0.0358972 | 1.871404 | 0.035897 | 0.777781 | 21  | 0.035897 | 0.964103 | 1.871404 | 0.964103 | 0.991269 | 21  | 0.964103 | 1.871404 | 1.871404 |
| GO:0006613 cotranslational protein targeting to membrane              | 0.0362781 | 1.912404 | 0.036278 | 0.777781 | 10  | 0.036278 | 0.963722 | 1.912404 | 0.963722 | 0.991269 | 10  | 0.963722 | 1.912404 | 1.912404 |
| GO:0006110 regulation of glycolytic process                           | 0.036303  | 1.889721 | 0.036303 | 0.777781 | 13  | 0.036303 | 0.963697 | 1.889721 | 0.963697 | 0.991269 | 13  | 0.963697 | 1.889721 | 1.889721 |
| GO:0002449 lymphocyte mediated immunity                               | 0.0364211 | 1.812223 | 0.036421 | 0.777781 | 69  | 0.036421 | 0.963579 | 1.812223 | 0.963579 | 0.991269 | 69  | 0.963579 | 1.812223 | 1.812223 |
| GO:0052548 regulation of endopeptidase activity                       | 0.0366504 | 1.798441 | 0.03665  | 0.777781 | 133 | 0.03665  | 0.96335  | 1.798441 | 0.96335  | 0.991269 | 133 | 0.96335  | 1.798441 | 1.798441 |
| GO:0006958 complement activation, classical pathway                   | 0.0368044 | 1.921562 | 0.036804 | 0.777781 | 11  | 0.036804 | 0.963196 | 1.921562 | 0.963196 | 0.991269 | 11  | 0.963196 | 1.921562 | 1.921562 |
| GO:0030316 osteoclast differentiation                                 | 0.0376398 | 1.825222 | 0.03764  | 0.777781 | 32  | 0.03764  | 0.96236  | 1.825222 | 0.96236  | 0.991269 | 32  | 0.96236  | 1.825222 | 1.825222 |
| GO:0009617 response to bacterium                                      | 0.0377484 | 1.785693 | 0.037748 | 0.777781 | 115 | 0.037748 | 0.962252 | 1.785693 | 0.962252 | 0.991269 | 115 | 0.962252 | 1.785693 | 1.785693 |
| GO:1901018 positive regulation of potassium ion transmembrane tran    | 0.0380256 | 1.887312 | 0.038026 | 0.777781 | 10  | 0.038026 | 0.961974 | 1.887312 | 0.961974 | 0.991269 | 10  | 0.961974 | 1.887312 | 1.887312 |
| GO:0045047 protein targeting to ER                                    | 0.038214  | 1.884207 | 0.038214 | 0.777781 | 10  | 0.038214 | 0.961786 | 1.884207 | 0.961786 | 0.991269 | 10  | 0.961786 | 1.884207 | 1.884207 |
| GO:0072599 establishment of protein localization to endoplasmic retic | 0.038214  | 1.884207 | 0.038214 | 0.777781 | 10  | 0.038214 | 0.961786 | 1.884207 | 0.961786 | 0.991269 | 10  | 0.961786 | 1.884207 | 1.884207 |
| GO:0032602 chemokine production                                       | 0.0382894 | 1.834956 | 0.038289 | 0.777781 | 22  | 0.038289 | 0.961711 | 1.834956 | 0.961711 | 0.991269 | 22  | 0.961711 | 1.834956 | 1.834956 |
| GO:0040011 locomotion                                                 | 0.0386524 | 1.76857  | 0.038652 | 0.777781 | 484 | 0.038652 | 0.961348 | 1.76857  | 0.961348 | 0.991269 | 484 | 0.961348 | 1.76857  | 1.76857  |
| GO:0048144 fibroblast proliferation                                   | 0.0387606 | 1.789404 | 0.038761 | 0.777781 | 40  | 0.038761 | 0.961239 | 1.789404 | 0.961239 | 0.991269 | 40  | 0.961239 | 1.789404 | 1.789404 |
| GO:0016477 cell migration                                             | 0.0389856 | 1.7652   | 0.038986 | 0.777781 | 379 | 0.038986 | 0.961014 | 1.7652   | 0.961014 | 0.991269 | 379 | 0.961014 | 1.7652   | 1.7652   |
| GO:0000041 transition metal ion transport                             | 0.0391606 | 1.785234 | 0.039161 | 0.777781 | 38  | 0.039161 | 0.960839 | 1.785234 | 0.960839 | 0.991269 | 38  | 0.960839 | 1.785234 | 1.785234 |
| GO:0030433 ER-associated ubiquitin-dependent protein catabolic proc   | 0.0392261 | 1.807258 | 0.039226 | 0.777781 | 21  | 0.039226 | 0.960774 | 1.807258 | 0.960774 | 0.991269 | 21  | 0.960774 | 1.807258 | 1.807258 |
| GO:0043068 positive regulation of programmed cell death               | 0.0392348 | 1.765231 | 0.039235 | 0.777781 | 191 | 0.039235 | 0.960765 | 1.765231 | 0.960765 | 0.991269 | 191 | 0.960765 | 1.765231 | 1.765231 |
| GO:0043277 apoptotic cell clearance                                   | 0.0392418 | 1.828018 | 0.039242 | 0.777781 | 15  | 0.039242 | 0.960758 | 1.828018 | 0.960758 | 0.991269 | 15  | 0.960758 | 1.828018 | 1.828018 |
| GO:0050764 regulation of phagocytosis                                 | 0.0398188 | 1.789226 | 0.039819 | 0.777781 | 26  | 0.039819 | 0.960181 | 1.789226 | 0.960181 | 0.991269 | 26  | 0.960181 | 1.789226 | 1.789226 |
| GO:0070663 regulation of leukocyte proliferation                      | 0.0400007 | 1.76672  | 0.040001 | 0.777781 | 70  | 0.040001 | 0.959999 | 1.76672  | 0.959999 | 0.991269 | 70  | 0.959999 | 1.76672  | 1.76672  |
| GO:0002819 regulation of adaptive immune response                     | 0.0400177 | 1.774665 | 0.040018 | 0.777781 | 50  | 0.040018 | 0.959982 | 1.774665 | 0.959982 | 0.991269 | 50  | 0.959982 | 1.774665 | 1.774665 |
| GO:0002474 antigen processing and presentation of peptide antigen v   | 0.0401004 | 1.810784 | 0.0401   | 0.777781 | 16  | 0.0401   | 0.9599   | 1.810784 | 0.9599   | 0.991269 | 16  | 0.9599   | 1.810784 | 1.810784 |
| GO:0002237 response to molecule of bacterial origin                   | 0.0403795 | 1.758864 | 0.040379 | 0.777781 | 72  | 0.040379 | 0.959621 | 1.758864 | 0.959621 | 0.991269 | 72  | 0.959621 | 1.758864 | 1.758864 |
| GO:0043268 positive regulation of potassium ion transport             | 0.0405099 | 1.810317 | 0.04051  | 0.777781 | 19  | 0.04051  | 0.95949  | 1.810317 | 0.95949  | 0.991269 | 19  | 0.95949  | 1.810317 | 1.810317 |
| GO:0051130 positive regulation of cellular component organization     | 0.0405181 | 1.747643 | 0.040518 | 0.777781 | 312 | 0.040518 | 0.959482 | 1.747643 | 0.959482 | 0.991269 | 312 | 0.959482 | 1.747643 | 1.747643 |
| GO:1901016 regulation of potassium ion transmembrane transporter c    | 0.0409684 | 1.798256 | 0.040968 | 0.777781 | 17  | 0.040968 | 0.959032 | 1.798256 | 0.959032 | 0.991269 | 17  | 0.959032 | 1.798256 | 1.798256 |
| GO:0010256 endomembrane system organization                           | 0.0411241 | 1.743399 | 0.041124 | 0.777781 | 159 | 0.041124 | 0.958876 | 1.743399 | 0.958876 | 0.991269 | 159 | 0.958876 | 1.743399 | 1.743399 |
| GO:0097529 myeloid leukocyte migration                                | 0.0417222 | 1.759551 | 0.041722 | 0.777781 | 42  | 0.041722 | 0.958278 | 1.759551 | 0.958278 | 0.991269 | 42  | 0.958278 | 1.759551 | 1.759551 |
| GO:0006900 membrane budding                                           | 0.0425073 | 1.768658 | 0.042507 | 0.777781 | 20  | 0.042507 | 0.957493 | 1.768658 | 0.957493 | 0.991269 | 20  | 0.957493 | 1.768658 | 1.768658 |
| GO:0030198 extracellular matrix organization                          | 0.0428351 | 1.729585 | 0.042835 | 0.777781 | 81  | 0.042835 | 0.957165 | 1.729585 | 0.957165 | 0.991269 | 81  | 0.957165 | 1.729585 | 1.729585 |
| GO:0043062 extracellular structure organization                       | 0.0428351 | 1.729585 | 0.042835 | 0.777781 | 81  | 0.042835 | 0.957165 | 1.729585 | 0.957165 | 0.991269 | 81  | 0.957165 | 1.729585 | 1.729585 |
| GO:0002673 regulation of acute inflammatory response                  | 0.042927  | 1.781413 | 0.042927 | 0.777781 | 20  | 0.042927 | 0.957073 | 1.781413 | 0.957073 | 0.991269 | 20  | 0.957073 | 1.781413 | 1.781413 |
| GO:0008202 steroid metabolic process                                  | 0.0431686 | 1.723078 | 0.043169 | 0.777781 | 109 | 0.043169 | 0.956831 | 1.723078 | 0.956831 | 0.991269 | 109 | 0.956831 | 1.723078 | 1.723078 |
| GO:0046890 regulation of lipid biosynthetic process                   | 0.0431983 | 1.731289 | 0.043198 | 0.777781 | 54  | 0.043198 | 0.956802 | 1.731289 | 0.956802 | 0.991269 | 54  | 0.956802 | 1.731289 | 1.731289 |
| GO:0030595 leukocyte chemotaxis                                       | 0.0433799 | 1.735471 | 0.04338  | 0.777781 | 49  | 0.04338  | 0.95662  | 1.735471 | 0.95662  | 0.991269 | 49  | 0.95662  | 1.735471 | 1.735471 |
| GO:0048193 Golgi vesicle transport                                    | 0.0434183 | 1.721788 | 0.043418 | 0.777781 | 91  | 0.043418 | 0.956582 | 1.721788 | 0.956582 | 0.991269 | 91  | 0.956582 | 1.721788 | 1.721788 |
| GO:0006643 membrane lipid metabolic process                           | 0.0445033 | 1.718643 | 0.044503 | 0.777781 | 52  | 0.044503 | 0.955497 | 1.718643 | 0.955497 | 0.991269 | 52  | 0.955497 | 1.718643 | 1.718643 |
| GO:0045944 positive regulation of transcription from RNA polymerase   | 0.0449958 | 1.697722 | 0.044996 | 0.777781 | 387 | 0.044996 | 0.955004 | 1.697722 | 0.955004 | 0.991269 | 387 | 0.955004 | 1.697722 | 1.697722 |
| GO:0032944 regulation of mononuclear cell proliferation               | 0.0454334 | 1.705819 | 0.045433 | 0.777781 | 69  | 0.045433 | 0.954567 | 1.705819 | 0.954567 | 0.991269 | 69  | 0.954567 | 1.705819 | 1.705819 |
| GO:0050670 regulation of lymphocyte proliferation                     | 0.0454334 | 1.705819 | 0.045433 | 0.777781 | 69  | 0.045433 | 0.954567 | 1.705819 | 0.954567 | 0.991269 | 69  | 0.954567 | 1.705819 | 1.705819 |
| GO:0051055 negative regulation of lipid biosynthetic process          | 0.0460375 | 1.743639 | 0.046037 | 0.777781 | 17  | 0.046037 | 0.953963 | 1.743639 | 0.953963 | 0.991269 | 17  | 0.953963 | 1.743639 | 1.743639 |
| GO:0022408 negative regulation of cell-cell adhesion                  | 0.0462766 | 1.744781 | 0.046277 | 0.777781 | 18  | 0.046277 | 0.953723 | 1.744781 | 0.953723 | 0.991269 | 18  | 0.953723 | 1.744781 | 1.744781 |
| GO:0006629 lipid metabolic process                                    | 0.0469243 | 1.677297 | 0.046924 | 0.777781 | 432 | 0.046924 | 0.953076 | 1.677297 | 0.953076 | 0.991269 | 432 | 0.953076 | 1.677297 | 1.677297 |
| GO:0060759 regulation of response to cytokine stimulus                | 0.046956  | 1.70312  | 0.046956 | 0.777781 | 31  | 0.046956 | 0.953044 | 1.70312  | 0.953044 | 0.991269 | 31  | 0.953044 | 1.70312  | 1.70312  |
| GO:0002250 adaptive immune response                                   | 0.0469785 | 1.686256 | 0.046979 | 0.777781 | 90  | 0.046979 | 0.953021 | 1.686256 | 0.953021 | 0.991269 | 90  | 0.953021 | 1.686256 | 1.686256 |
| GO:0043470 regulation of carbohydrate catabolic process               | 0.0474601 | 1.735463 | 0.04746  | 0.777781 | 15  | 0.04746  | 0.95254  | 1.735463 | 0.95254  | 0.991269 | 15  | 0.95254  | 1.735463 | 1.735463 |
| GO:0043471 regulation of cellular carbohydrate catabolic process      | 0.0474601 | 1.735463 | 0.04746  | 0.777781 | 15  | 0.04746  | 0.95254  | 1.735463 | 0.95254  | 0.991269 | 15  | 0.95254  | 1.735463 | 1.735463 |
| GO:0006879 cellular iron ion homeostasis                              | 0.048328  | 1.715973 | 0.048328 | 0.777781 | 17  | 0.048328 | 0.951672 | 1.715973 | 0.951672 | 0.991269 | 17  | 0.951672 | 1.715973 | 1.715973 |



Supplemental Table 7

|                                                                  |           |          |          |          |     |          |          |          |          |          |     |          |          |          |
|------------------------------------------------------------------|-----------|----------|----------|----------|-----|----------|----------|----------|----------|----------|-----|----------|----------|----------|
| GO:0050868 negative regulation of T cell activation              | 0.0483411 | 1.69336  | 0.048341 | 0.777781 | 36  | 0.048341 | 0.951659 | 1.69336  | 0.951659 | 0.991269 | 36  | 0.951659 | 1.69336  | 1.69336  |
| GO:0048284 organelle fusion                                      | 0.0486815 | 1.680969 | 0.048681 | 0.777781 | 36  | 0.048681 | 0.951319 | 1.680969 | 0.951319 | 0.991269 | 36  | 0.951319 | 1.680969 | 1.680969 |
| GO:0043161 proteasome-mediated ubiquitin-dependent protein catak | 0.0503547 | 1.649707 | 0.050355 | 0.777781 | 108 | 0.050355 | 0.949645 | 1.649707 | 0.949645 | 0.991269 | 108 | 0.949645 | 1.649707 | 1.649707 |

Supplemental Table 8

| Gene symbol          | Fold-regulation | 2 <sup>Δ(-Avg.(Delta(Ct)))</sup> |               | Average Ct   |              | Quality control |
|----------------------|-----------------|----------------------------------|---------------|--------------|--------------|-----------------|
|                      |                 | Control P7                       | Lop/+ P7      | Control P7   | Lop/+ P7     |                 |
| <b><i>Ddit3</i></b>  | <b>12.25</b>    | <b>0.0331</b>                    | <b>0.4061</b> | <b>29.02</b> | <b>25.50</b> | <b>OKAY</b>     |
| <b><i>Dnajb9</i></b> | <b>5.83</b>     | <b>0.0575</b>                    | <b>0.3353</b> | <b>28.23</b> | <b>25.77</b> | <b>OKAY</b>     |
| <i>Cebpb</i>         | 5.14            | 0.0140                           | 0.0721        | 30.26        | 27.99        | A               |
| <b><i>Xbp1</i></b>   | <b>3.76</b>     | <b>0.1047</b>                    | <b>0.3941</b> | <b>27.36</b> | <b>25.54</b> | <b>OKAY</b>     |
| <b><i>Hspa5</i></b>  | <b>2.55</b>     | <b>0.6177</b>                    | <b>1.5728</b> | <b>24.80</b> | <b>23.54</b> | <b>OKAY</b>     |
| <b><i>Insig1</i></b> | <b>2.26</b>     | <b>0.1162</b>                    | <b>0.2624</b> | <b>27.21</b> | <b>26.13</b> | <b>OKAY</b>     |
| <i>Herpud1</i>       | 2.03            | 0.0055                           | 0.0112        | 31.62        | 30.68        | B               |
| <i>Edem1</i>         | 1.80            | 0.0057                           | 0.0103        | 31.56        | 30.80        | B               |
| <i>Eif2ak3</i>       | 1.71            | 0.0042                           | 0.0071        | 32.02        | 31.33        | B               |
| <i>Ero1l</i>         | 1.67            | 0.0385                           | 0.0644        | 28.81        | 28.15        | OKAY            |
| <i>Serp1</i>         | 1.66            | 0.0925                           | 0.1539        | 27.54        | 26.90        | OKAY            |
| <i>Armet</i>         | 1.64            | 0.0024                           | 0.0040        | 32.80        | 32.17        | B               |
| <i>Creb3</i>         | 1.62            | 0.0623                           | 0.1011        | 28.11        | 27.50        | OKAY            |
| <i>Sil1</i>          | 1.48            | 0.0226                           | 0.0334        | 29.58        | 29.10        | OKAY            |
| <i>Ern1</i>          | 1.46            | 0.0084                           | 0.0123        | 31.00        | 30.54        | B               |
| <i>Canx</i>          | 1.44            | 0.8265                           | 1.1865        | 24.38        | 23.95        | OKAY            |
| <i>Ubxn4</i>         | 1.42            | 0.1555                           | 0.2202        | 26.79        | 26.38        | OKAY            |
| <i>Dnajc3</i>        | 1.40            | 0.0890                           | 0.1244        | 27.60        | 27.20        | OKAY            |
| <i>Sec63</i>         | 1.27            | 0.0035                           | 0.0045        | 32.25        | 32.00        | B               |
| <i>Sreb2</i>         | 1.19            | 0.0518                           | 0.0618        | 28.38        | 28.21        | OKAY            |
| <i>Atf4</i>          | 1.17            | 0.1786                           | 0.2097        | 26.59        | 26.45        | OKAY            |
| <i>Rpn1</i>          | 1.17            | 0.1914                           | 0.2243        | 26.49        | 26.35        | OKAY            |
| <i>Ero1lb</i>        | 1.14            | 0.0063                           | 0.0072        | 31.42        | 31.32        | B               |
| <i>Prkcsh</i>        | 1.10            | 0.0822                           | 0.0905        | 27.71        | 27.66        | OKAY            |
| <i>Usp14</i>         | 1.10            | 0.0944                           | 0.1039        | 27.51        | 27.46        | OKAY            |
| <i>Hspa4l</i>        | 1.09            | 0.0546                           | 0.0595        | 28.30        | 28.27        | OKAY            |
| <i>Sel1l</i>         | 1.09            | 0.0418                           | 0.0454        | 28.69        | 28.66        | OKAY            |
| <i>Edem3</i>         | 1.07            | 0.0974                           | 0.1046        | 27.47        | 27.45        | OKAY            |
| <i>Atf6</i>          | 1.07            | 0.0557                           | 0.0598        | 28.27        | 28.26        | OKAY            |
| <i>Calr</i>          | 1.07            | 0.2491                           | 0.2661        | 26.11        | 26.11        | OKAY            |
| <i>Fbxo6</i>         | 1.07            | 0.0005                           | 0.0006        | 35.00        | 35.00        | C               |
| <i>Erp44</i>         | 1.06            | 0.0236                           | 0.0251        | 29.51        | 29.51        | OKAY            |
| <i>Syvn1</i>         | 1.03            | 0.0591                           | 0.0608        | 28.19        | 28.24        | OKAY            |
| <i>Mapk8</i>         | 1.02            | 0.0137                           | 0.0140        | 30.30        | 30.36        | B               |
| <i>Sreb1</i>         | 1.01            | 0.0813                           | 0.0823        | 27.73        | 27.80        | OKAY            |
| <i>Insig2</i>        | 1.01            | 0.1073                           | 0.1081        | 27.33        | 27.41        | OKAY            |
| <i>Ube2g2</i>        | -1.00           | 0.1696                           | 0.1692        | 26.67        | 26.76        | OKAY            |
| <i>Pdia3</i>         | -1.01           | 0.0069                           | 0.0068        | 31.28        | 31.39        | B               |
| <i>Bax</i>           | -1.02           | 0.1066                           | 0.1049        | 27.34        | 27.45        | OKAY            |
| <i>Ugcgl1</i>        | -1.02           | 0.0472                           | 0.0461        | 28.51        | 28.64        | OKAY            |
| <i>Ppp1r15b</i>      | -1.03           | 0.1096                           | 0.1068        | 27.30        | 27.42        | OKAY            |
| <i>Eif2a</i>         | -1.05           | 0.1047                           | 0.0994        | 27.36        | 27.53        | OKAY            |
| <i>Mbtps2</i>        | -1.06           | 0.0132                           | 0.0125        | 30.35        | 30.52        | B               |
| <i>Nucb1</i>         | -1.08           | 0.2615                           | 0.2432        | 26.04        | 26.24        | OKAY            |
| <i>Vcp</i>           | -1.08           | 0.5743                           | 0.5297        | 24.91        | 25.11        | OKAY            |
| <i>H47</i>           | -1.09           | 0.2517                           | 0.2316        | 26.10        | 26.31        | OKAY            |
| <i>Atf6b</i>         | -1.11           | 0.0264                           | 0.0238        | 29.35        | 29.59        | OKAY            |
| <i>Ganab</i>         | -1.11           | 0.2415                           | 0.2171        | 26.16        | 26.40        | OKAY            |

Supplemental Table 8

|                      |              |               |               |              |              |             |
|----------------------|--------------|---------------|---------------|--------------|--------------|-------------|
| <i>Ganc</i>          | -1.12        | 0.0028        | 0.0025        | 32.57        | 32.83        | B           |
| <i>Sec62</i>         | -1.15        | 0.2316        | 0.2012        | 26.22        | 26.51        | OKAY        |
| <i>Derl1</i>         | -1.16        | 0.0018        | 0.0015        | 33.25        | 33.56        | B           |
| <i>Mapk9</i>         | -1.17        | 0.0137        | 0.0117        | 30.30        | 30.62        | B           |
| <i>Scap</i>          | -1.19        | 0.0759        | 0.0638        | 27.83        | 28.17        | OKAY        |
| <i>Ugcgl2</i>        | -1.20        | 0.0138        | 0.0115        | 30.28        | 30.64        | B           |
| <i>Os9</i>           | -1.21        | 0.0306        | 0.0253        | 29.14        | 29.50        | OKAY        |
| <i>Rnf5</i>          | -1.23        | 0.2088        | 0.1692        | 26.37        | 26.76        | OKAY        |
| <i>Ufd1l</i>         | -1.27        | 0.0857        | 0.0676        | 27.65        | 28.08        | OKAY        |
| <i>Amfr</i>          | -1.27        | 0.5123        | 0.4033        | 25.07        | 25.51        | OKAY        |
| <i>Hsph1</i>         | -1.27        | 0.0288        | 0.0226        | 29.23        | 29.67        | OKAY        |
| <i>Cct4</i>          | -1.29        | 0.4897        | 0.3807        | 25.14        | 25.59        | OKAY        |
| <i>Derl2</i>         | -1.29        | 0.0333        | 0.0257        | 29.02        | 29.48        | OKAY        |
| <i>Hspa1l</i>        | -1.30        | 0.0052        | 0.0040        | 31.70        | 32.17        | B           |
| <i>Hspa2</i>         | -1.31        | 0.0250        | 0.0191        | 29.43        | 29.90        | OKAY        |
| <i>Atxn3</i>         | -1.31        | 0.0327        | 0.0249        | 29.04        | 29.52        | OKAY        |
| <i>Rnf139</i>        | -1.32        | 0.0440        | 0.0333        | 28.61        | 29.10        | OKAY        |
| <i>Mbtps1</i>        | -1.34        | 0.1539        | 0.1148        | 26.81        | 27.32        | OKAY        |
| <i>Dnajc4</i>        | -1.39        | 0.0347        | 0.0249        | 28.96        | 29.53        | OKAY        |
| <i>Ppia</i>          | -1.40        | 20.2521       | 14.4868       | 19.77        | 20.34        | OKAY        |
| <i>Nploc4</i>        | -1.41        | 0.0786        | 0.0558        | 27.78        | 28.36        | OKAY        |
| <i>Hspb9</i>         | -1.43        | 0.0011        | 0.0008        | 33.94        | 34.55        | B           |
| <i>Pfdn5</i>         | -1.46        | 0.9931        | 0.6814        | 24.12        | 24.75        | OKAY        |
| <i>Pfdn2</i>         | -1.48        | 0.2059        | 0.1387        | 26.39        | 27.05        | OKAY        |
| <i>Dnajc10</i>       | -1.53        | 0.0938        | 0.0612        | 27.52        | 28.23        | OKAY        |
| <i>Cct7</i>          | -1.54        | 1.9931        | 1.2983        | 23.11        | 23.82        | OKAY        |
| <i>Tor1a</i>         | -1.56        | 0.0178        | 0.0114        | 29.92        | 30.66        | A           |
| <i>Tcp1</i>          | -1.59        | 2.7321        | 1.7211        | 22.66        | 23.41        | OKAY        |
| <i>Htra2</i>         | -1.60        | 0.0720        | 0.0449        | 27.90        | 28.67        | OKAY        |
| <i>Ube2j2</i>        | -1.66        | 0.0024        | 0.0015        | 32.78        | 33.61        | B           |
| <i>Htra4</i>         | -1.70        | 0.0058        | 0.0034        | 31.54        | 32.40        | B           |
| <i>Hspa4</i>         | -1.88        | 0.0470        | 0.0250        | 28.52        | 29.52        | OKAY        |
| <i>Mapk10</i>        | -2.00        | 0.0018        | 0.0009        | 33.23        | 34.32        | B           |
| <i>Creb3l3</i>       | -2.08        | 0.0014        | 0.0007        | 33.62        | 34.77        | B           |
| <b><i>Dnajb2</i></b> | <b>-2.65</b> | <b>0.6307</b> | <b>0.2376</b> | <b>24.77</b> | <b>26.27</b> | <b>OKAY</b> |
| <i>Ern2</i>          | -5.59        | 0.0034        | 0.0006        | 32.33        | 34.90        | B           |
| <i>Gusb</i>          | 1.47         | 0.0355        | 0.0522        | 28.92        | 28.46        | OKAY        |
| <i>Hprt1</i>         | 1.09         | 0.1487        | 0.1627        | 26.86        | 26.82        | OKAY        |
| <i>Hsp90ab1</i>      | -1.82        | 8.0000        | 4.4076        | 21.11        | 22.06        | OKAY        |
| <i>Gapdh</i>         | 1.19         | 3.2830        | 3.9086        | 22.39        | 22.23        | OKAY        |
| <i>Actb</i>          | -1.05        | 7.2100        | 6.8369        | 21.26        | 21.42        | OKAY        |
| <i>MGDC</i>          | 1.07         | 0.0005        | 0.0006        | 35.00        | 35.00        | C           |
| <i>RTC</i>           | 2.71         | 0.0489        | 0.1324        | 28.46        | 27.11        | OKAY        |
| <i>RTC</i>           | -1.38        | 0.1713        | 0.1244        | 26.65        | 27.20        | OKAY        |
| <i>RTC</i>           | -1.37        | 0.2059        | 0.1500        | 26.39        | 26.93        | OKAY        |
| <i>PPC</i>           | -2.13        | 20.8938       | 9.8264        | 19.72        | 20.90        | OKAY        |
| <i>PPC</i>           | -1.89        | 19.0273       | 10.0561       | 19.86        | 20.87        | OKAY        |
| <i>PPC</i>           | -2.03        | 17.7531       | 8.7341        | 19.96        | 21.07        | OKAY        |

Supplemental Table 9

| Gene symbol   | Fold-regulation | 2 <sup>^</sup> (-Avg.(Delta(Ct))) |               | Average Ct   |              | Quality control |
|---------------|-----------------|-----------------------------------|---------------|--------------|--------------|-----------------|
|               |                 | Control P1                        | Lop/+ P1      | Control P1   | Lop/+ P1     |                 |
| <b>Dnajb9</b> | <b>2.03</b>     | <b>0.0829</b>                     | <b>0.1682</b> | <b>27.52</b> | <b>26.60</b> | <b>OKAY</b>     |
| <b>Ddit3</b>  | <b>1.66</b>     | <b>0.0361</b>                     | <b>0.0599</b> | <b>28.72</b> | <b>28.09</b> | <b>OKAY</b>     |
| <b>Cebpb</b>  | <b>1.44</b>     | <b>0.0180</b>                     | <b>0.0261</b> | <b>29.72</b> | <b>29.29</b> | <b>OKAY</b>     |
| Htra4         | 1.38            | 0.0016                            | 0.0022        | 33.20        | 32.84        | B               |
| Xbp1          | 1.37            | 0.0970                            | 0.1329        | 27.30        | 26.94        | OKAY            |
| Ppia          | 1.35            | 10.8128                           | 14.6010       | 20.50        | 20.16        | OKAY            |
| Tcp1          | 1.30            | 1.6298                            | 2.1184        | 23.23        | 22.95        | OKAY            |
| Herpud1       | 1.27            | 0.0048                            | 0.0061        | 31.65        | 31.40        | B               |
| Usp14         | 1.27            | 0.1019                            | 0.1297        | 27.23        | 26.98        | OKAY            |
| Insig2        | 1.24            | 0.0611                            | 0.0758        | 27.96        | 27.75        | OKAY            |
| Ero1lb        | 1.20            | 0.0088                            | 0.0106        | 30.75        | 30.59        | B               |
| Pfdn5         | 1.19            | 0.6233                            | 0.7438        | 24.61        | 24.46        | OKAY            |
| Serp1         | 1.17            | 0.1189                            | 0.1390        | 27.00        | 26.88        | OKAY            |
| Rnf5          | 1.16            | 0.1598                            | 0.1853        | 26.58        | 26.46        | OKAY            |
| Dnajc4        | 1.16            | 0.0172                            | 0.0200        | 29.79        | 29.68        | OKAY            |
| Dnajc10       | 1.15            | 0.1117                            | 0.1288        | 27.09        | 26.99        | OKAY            |
| Calr          | 1.14            | 0.2423                            | 0.2761        | 25.98        | 25.89        | OKAY            |
| Atf4          | 1.14            | 0.1133                            | 0.1288        | 27.07        | 26.99        | OKAY            |
| Ubxn4         | 1.13            | 0.1857                            | 0.2107        | 26.36        | 26.28        | OKAY            |
| Ube2g2        | 1.13            | 0.1322                            | 0.1495        | 26.85        | 26.77        | OKAY            |
| Hspa5         | 1.13            | 0.7656                            | 0.8633        | 24.32        | 24.24        | OKAY            |
| Sel1l         | 1.10            | 0.0557                            | 0.0616        | 28.10        | 28.05        | OKAY            |
| Edem3         | 1.09            | 0.0859                            | 0.0936        | 27.47        | 27.45        | OKAY            |
| Creb3         | 1.08            | 0.0720                            | 0.0776        | 27.73        | 27.72        | OKAY            |
| Syvn1         | 1.07            | 0.0569                            | 0.0611        | 28.07        | 28.06        | OKAY            |
| Ern2          | 1.07            | 0.0005                            | 0.0005        | 35.00        | 35.00        | C               |
| Fbxo6         | 1.07            | 0.0005                            | 0.0005        | 35.00        | 35.00        | C               |
| Erp44         | 1.05            | 0.0232                            | 0.0243        | 29.36        | 29.39        | OKAY            |
| Dnajc3        | 1.05            | 0.1197                            | 0.1253        | 26.99        | 27.03        | OKAY            |
| Cct4          | 1.04            | 0.5133                            | 0.5333        | 24.89        | 24.94        | OKAY            |
| Vcp           | 1.04            | 0.4563                            | 0.4740        | 25.06        | 25.11        | OKAY            |
| Hspa2         | 1.04            | 0.0209                            | 0.0217        | 29.51        | 29.56        | OKAY            |
| Srebfl        | 1.03            | 0.0827                            | 0.0850        | 27.53        | 27.59        | OKAY            |
| Amfr          | 1.03            | 0.4093                            | 0.4199        | 25.22        | 25.28        | OKAY            |
| Eif2a         | 1.02            | 0.1084                            | 0.1102        | 27.14        | 27.21        | OKAY            |
| Sec62         | 1.02            | 0.2319                            | 0.2354        | 26.04        | 26.12        | OKAY            |
| Atf6          | 1.01            | 0.0509                            | 0.0516        | 28.23        | 28.31        | OKAY            |
| Nploc4        | -1.00           | 0.0749                            | 0.0747        | 27.67        | 27.77        | OKAY            |
| Edem1         | -1.01           | 0.0070                            | 0.0069        | 31.10        | 31.21        | B               |
| Cct7          | -1.02           | 1.5383                            | 1.5084        | 23.31        | 23.44        | OKAY            |
| H47           | -1.02           | 0.1888                            | 0.1847        | 26.34        | 26.47        | OKAY            |
| Hspa4l        | -1.03           | 0.0597                            | 0.0580        | 28.00        | 28.14        | OKAY            |
| Ugcgl2        | -1.04           | 0.0189                            | 0.0182        | 29.65        | 29.81        | OKAY            |
| Nucb1         | -1.04           | 0.2701                            | 0.2585        | 25.82        | 25.98        | OKAY            |
| Ufd1l         | -1.06           | 0.0681                            | 0.0644        | 27.81        | 27.99        | OKAY            |
| Ugcgl1        | -1.06           | 0.0512                            | 0.0483        | 28.22        | 28.40        | OKAY            |
| Pfdn2         | -1.06           | 0.1257                            | 0.1181        | 26.92        | 27.11        | OKAY            |
| Sec63         | -1.09           | 0.0063                            | 0.0058        | 31.23        | 31.46        | B               |

Supplemental Table 9

|                 |       |        |        |       |       |      |
|-----------------|-------|--------|--------|-------|-------|------|
| <i>Hspb9</i>    | -1.10 | 0.0008 | 0.0007 | 34.22 | 34.45 | B    |
| <i>Canx</i>     | -1.13 | 0.8456 | 0.7516 | 24.17 | 24.44 | OKAY |
| <i>Scap</i>     | -1.13 | 0.0660 | 0.0586 | 27.85 | 28.12 | OKAY |
| <i>Bax</i>      | -1.14 | 0.1082 | 0.0949 | 27.14 | 27.43 | OKAY |
| <i>Creb3l3</i>  | -1.14 | 0.0006 | 0.0005 | 34.57 | 34.86 | B    |
| <i>Ganab</i>    | -1.14 | 0.2143 | 0.1879 | 26.15 | 26.44 | OKAY |
| <i>Sil1</i>     | -1.14 | 0.0295 | 0.0258 | 29.02 | 29.31 | OKAY |
| <i>Ero1l</i>    | -1.17 | 0.0439 | 0.0375 | 28.44 | 28.77 | OKAY |
| <i>Ganc</i>     | -1.18 | 0.0023 | 0.0020 | 32.69 | 33.03 | B    |
| <i>Mbtps1</i>   | -1.18 | 0.1573 | 0.1329 | 26.60 | 26.94 | OKAY |
| <i>Mapk10</i>   | -1.19 | 0.0011 | 0.0009 | 33.81 | 34.16 | B    |
| <i>Insig1</i>   | -1.19 | 0.1647 | 0.1385 | 26.53 | 26.88 | OKAY |
| <i>Derl2</i>    | -1.19 | 0.0322 | 0.0270 | 28.89 | 29.24 | OKAY |
| <i>Derl1</i>    | -1.20 | 0.0016 | 0.0013 | 33.25 | 33.62 | B    |
| <i>Tor1a</i>    | -1.22 | 0.0152 | 0.0125 | 29.97 | 30.36 | A    |
| <i>Mbtps2</i>   | -1.22 | 0.0168 | 0.0138 | 29.83 | 30.21 | A    |
| <i>Ube2j2</i>   | -1.23 | 0.0025 | 0.0020 | 32.56 | 32.96 | B    |
| <i>Eif2ak3</i>  | -1.24 | 0.0084 | 0.0068 | 30.83 | 31.23 | B    |
| <i>Htra2</i>    | -1.27 | 0.0589 | 0.0463 | 28.02 | 28.46 | OKAY |
| <i>Hspa4</i>    | -1.29 | 0.0349 | 0.0271 | 28.77 | 29.24 | OKAY |
| <i>Pdia3</i>    | -1.30 | 0.0078 | 0.0060 | 30.94 | 31.41 | B    |
| <i>Mapk8</i>    | -1.31 | 0.0180 | 0.0137 | 29.73 | 30.22 | A    |
| <i>Rnf139</i>   | -1.33 | 0.0524 | 0.0395 | 28.19 | 28.69 | OKAY |
| <i>Rpn1</i>     | -1.34 | 0.2158 | 0.1608 | 26.14 | 26.67 | OKAY |
| <i>Prkcsh</i>   | -1.35 | 0.1231 | 0.0911 | 26.95 | 27.49 | OKAY |
| <i>Dnajb2</i>   | -1.36 | 0.2809 | 0.2063 | 25.76 | 26.31 | OKAY |
| <i>Ern1</i>     | -1.36 | 0.0113 | 0.0083 | 30.39 | 30.94 | B    |
| <i>Ppp1r15b</i> | -1.40 | 0.1154 | 0.0826 | 27.05 | 27.63 | OKAY |
| <i>Os9</i>      | -1.40 | 0.0309 | 0.0221 | 28.95 | 29.53 | OKAY |
| <i>Atf6b</i>    | -1.42 | 0.0281 | 0.0198 | 29.09 | 29.69 | OKAY |
| <i>Atxn3</i>    | -1.42 | 0.0350 | 0.0247 | 28.77 | 29.37 | OKAY |
| <i>Srebf2</i>   | -1.44 | 0.0903 | 0.0626 | 27.40 | 28.03 | OKAY |
| <i>Hsph1</i>    | -1.45 | 0.0547 | 0.0378 | 28.12 | 28.76 | OKAY |
| <i>Mapk9</i>    | -1.75 | 0.0154 | 0.0088 | 29.95 | 30.86 | A    |
| <i>Armet</i>    | -2.04 | 0.0068 | 0.0033 | 31.14 | 32.27 | B    |
| <i>Hspa1l</i>   | -2.10 | 0.0051 | 0.0024 | 31.54 | 32.71 | B    |
| <i>Gusb</i>     | -1.16 | 0.0620 | 0.0532 | 27.94 | 28.26 | OKAY |
| <i>Hprt1</i>    | 1.00  | 0.1411 | 0.1414 | 26.76 | 26.85 | OKAY |
| <i>Hsp90ab1</i> | -1.03 | 6.2680 | 6.0966 | 21.28 | 21.42 | OKAY |
| <i>Gapdh</i>    | 1.31  | 3.4216 | 4.4785 | 22.16 | 21.87 | OKAY |
| <i>Actb</i>     | -1.10 | 5.3320 | 4.8669 | 21.52 | 21.75 | OKAY |
| <i>MGDC</i>     | 1.07  | 0.0005 | 0.0005 | 35.00 | 35.00 | C    |
| <i>RTC</i>      | -1.08 | 0.1181 | 0.1094 | 27.01 | 27.22 | OKAY |
| <i>RTC</i>      | -1.09 | 0.1125 | 0.1035 | 27.08 | 27.30 | OKAY |
| <i>RTC</i>      | -1.09 | 0.1254 | 0.1153 | 26.93 | 27.15 | OKAY |
| <i>PPC</i>      | 1.00  | 7.5930 | 7.6105 | 21.01 | 21.10 | OKAY |
| <i>PPC</i>      | 1.02  | 7.4712 | 7.6105 | 21.03 | 21.10 | OKAY |
| <i>PPC</i>      | -1.09 | 7.0682 | 6.4890 | 21.11 | 21.33 | OKAY |
